# Supplementary material for: New Anticancer Theobromine Derivative Targeting EGFRWT and EGFRT790M: Design, Semi-Synthesis, In Silico, and In Vitro Anticancer Studies
Source: MDPI journal article supplement (doi:10.3390/molecules27185859), 2022-09-09
Supplement: s1 [file s1]

## Supporting data

### **New anticancer theobromine derivative targeting EGFR<sup>WT</sup> and EGFR<sup>T790M</sup>: design, semi-synthesis, *in silico* and *in vitro* anticancer studies**

Eslam B. Elkaeed<sup>a</sup>, Reda G.Yousef <sup>b</sup>, Hazem Elkady<sup>b</sup>, Aisha A. Als fouk<sup>c</sup>, Dalal Z. Husein<sup>d</sup>, Ibrahim M. Ibrahim<sup>e</sup>, Ahmed M. Metwaly<sup>f,g\*</sup> Ibrahim H. Eissa<sup>b\*</sup>

<sup>a</sup> Department of Pharmaceutical Sciences, College of Pharmacy, AlMaarefa University, Riyadh 13713, Saudi Arabia.

<sup>b</sup> Pharmaceutical Medicinal Chemistry & Drug Design Department, Faculty of Pharmacy (Boys), Al-Azhar University, Cairo11884, Egypt.

<sup>c</sup> Department of Pharmaceutical Sciences, College of Pharmacy, Princess Nourah bint Abdulrahman University, P.O. Box 84428, Riyadh 11671, Saudi Arabia

<sup>d</sup> Chemistry Department, Faculty of Science, New Valley University, El-Kharja 72511, Egypt.

<sup>e</sup> Biophysics Department, Faculty of Science, Cairo University. Cairo 12613, Egypt.

<sup>f</sup> Pharmacognosy and Medicinal Plants Department, Faculty of Pharmacy (Boys), Al-Azhar University, Cairo 11884, Egypt.

<sup>g</sup> Biopharmaceutical Products Research Department, Genetic Engineering and Biotechnology Research Institute, City of Scientific Research and Technological Applications (SRTA-City), Alexandria, Egypt.

## Content

|                      |                                                           |
|----------------------|-----------------------------------------------------------|
| <b>Method</b>        | <b>Molecular Docking</b>                                  |
|                      | <b>MD Simulations</b>                                     |
|                      | <b>MM-GBSA</b>                                            |
|                      | <b>DFT</b>                                                |
|                      | <b>ADMET studies</b>                                      |
|                      | <b>Toxicity studies</b>                                   |
|                      | <b>Synthesis</b>                                          |
|                      | <b><i>In vitro</i> assays</b>                             |
|                      | <b>IR of compound 5</b>                                   |
| <b>Spectral Data</b> | <b><sup>1</sup>H and <sup>13</sup>C NMR of compound 5</b> |
|                      | <b>Toxicity report</b>                                    |

# Method

- **Molecular Docking studies**

Crystal structure of wild (EGFR<sup>WT</sup>; PDB: 4HJO) and mutant (EGFR<sup>T790M</sup>; PDB: 3W2O) types of EGFR-TK were obtained from Protein Data Bank. The docking investigation was accomplished using MOE2014 software. At first, the crystal structure of EGFR was prepared by removing water molecules. Only one chain was retained besides the co-crystallized ligand (erlotinib). Then, the selected chain was protonated and subjected to the minimization of the energy process. Next, the active site of the target protein was defined.

Structures of the synthesized compound and erlotinib were drawn using ChemBioDraw Ultra 14.0 and saved as MDL-SD format. Such a file was opened using MOE to display the 3D structures which were protonated and subjected to energy minimization. Formerly, validation of the docking process was performed by docking the co-crystallized ligand against the isolated pocket of the active site. The produced RMSD value indicated the validity of the process. Finally, docking of the tested compounds was done through the dock option inserted in compute window. For each docked molecule, 30 docked poses were produced using ASE for scoring function and force field for refinement. The results of the docking process were then visualized using Discovery Studio 4.0 software.

- **Molecular Dynamic Simulation**

Molecular Dynamic Simulation:

In this study, we performed a classical molecular dynamic (MD) simulation to study the stability and the binding affinity of the protein-COMPOUND 5 complex. To prepare the system, the solution builder module in the CHARMM-GUI web server was utilized to generate the necessary files (1–4). First, the complex was uploaded as a PDB file, solvated using the transferable intermolecular potential 3P (TIP3P) water model in a cubic box with a padding of 1 nm, and neutralized with Na<sup>+</sup> and Cl<sup>-</sup> ions to the physiological concentration of 0.154 M of salt concentration. The CHARMM36m force field was used to parameterize the amino acids of the protein, neutralizing ions, and water molecules while the CHARMM general force field (CGenFF) tool implemented in CHARMM-GUI was utilized to parameterize the compound

COMPOUND 5. GROMACS 2021 (5) was utilized as an MD engine to perform the simulation with periodic boundary conditions (PBC) applied to the system. Before the production run, the system must be minimized and equilibrated therefore, a minimization step using the steepest descent algorithm with a max force set to  $100 \text{ KJ.mol}^{-1}.\text{nm}^{-1}$  as a convergence criterion was initiated followed by two equilibration steps. The first equilibration step was in a constant number of atoms, constant volume, and constant temperature (NVT) ensemble while the second step was in a constant number of atoms, constant pressure, and constant temperature (NPT) ensemble. The temperature was set to 310 K and maintained using the V-rescale algorithm (6) during the equilibration. On the other hand, the pressure was set to 1 atmospheric pressure and maintained using the Berendsen barostat. Finally, the production run was in an NVT ensemble for 100 ns and the temperature was maintained using the Nose-Hoover thermostat (7). In each step, the bond lengths of hydrogen-bonded atoms were constrained using LINear Constraint Solver (LINCS) algorithm (8). The calculation of the electrostatics was performed using Particle Mesh Ewald (PME) (9) algorithm with a cutoff of 1.2 nm. To integrate the Newtonian equations of motion, the leap-frog algorithm was used with a time step of 1 femtosecond for the equilibration steps and 2 femtoseconds for the production step. The production run was saved for every 100 picoseconds with a total of 1000 frames. Before analyzing the trajectory, the PBC was removed using the trjconv tool in GROMACS. The analysis of the production trajectory was performed using VMD TK scripts (10). Root mean square deviation (RMSD) for the protein alone, the compound COMPOUND 5, and the complex were measured. In addition, the root mean square fluctuation (RMSF), the solvent accessible surface area (SASA), the radius of gyration (RoG), the number of hydrogen bonds, and the distance between the center of mass of the compound COMPOUND 5 and the center of mass of the protein were measured. Afterward,

the trajectory was clustered using TtClust (11) to get a representative frame for each cluster. First, backbone alignment was performed before determining the optimum number of clusters using the elbow method. For each representative frame, protein Ligand interaction profiler (PLIP) was used to detect the number and types of interactions (12).

### **Binding free energy calculation using MM-GBSA:**

To find the binding affinity, the gmx\_MMPBSA package was used with Molecular Mechanics Generalized Born Surface Area (MM-GBSA) algorithm. In addition, decomposition analysis was calculated to get the binding energies of amino acids within 1 nm around the compound COMPOUND 5 (13,14). The salt concentration and the method of solvation (igb) were set to 0.154 M and 5, respectively. The internal and external dielectric constants were set to 1.0 and 80.0, respectively, and other options were set as default. MM-GBSA approach is depicted in Equation 1.

$$\Delta G = \langle G_{\text{complex}} - G_{\text{receptor}} - G_{\text{compound}} \rangle \quad \text{Equation 1}$$

Where  $\langle \rangle$  represents the average of the enclosed free energies of the complex, the receptor, and compound over the frames used in calculation. In our approach, we used the whole trajectory (a total of 1000 frames). Different energy terms can be calculated according to Equations 2 to 6 as follows:

$$\Delta G_{\text{binding}} = \Delta H - T\Delta S \quad \text{Equation 2}$$

$$\Delta H = \Delta E_{\text{gas}} + \Delta E_{\text{sol}} \quad \text{Equation 3}$$

$$\Delta E_{\text{gas}} = \Delta E_{\text{ele}} + \Delta E_{\text{vdW}} \quad \text{Equation 4}$$

$$\Delta E_{\text{solv}} = E_{\text{GB}} + E_{\text{SA}} \quad \text{Equation 5}$$

$$E_{\text{SA}} = \gamma \cdot \text{SASA} \quad \text{Equation 6}$$

Where:

$\Delta H$  is the enthalpy which can be calculated from gas-phase energy ( $E_{\text{gas}}$ ) and solvation-free energy ( $E_{\text{sol}}$ ).  $T\Delta S$  is the entropy contribution to the free binding energy.  $E_{\text{gas}}$  is composed of electrostatic and van der Waals terms;  $E_{\text{ele}}$ ,  $E_{\text{vdW}}$ , respectively.  $E_{\text{sol}}$  can be calculated from the polar solvation energy ( $E_{\text{GB}}$ ) and nonpolar solvation energy ( $E_{\text{SA}}$ ) which is estimated from the solvent-accessible surface area (15,16).

- **Density Function Theory (DFT) calculations**

The Gaussian 09 program was used to perform the quantum chemistry calculations using the DFT method. GaussianView5 was used to display all of the data files. The density function theory (DFT) at 6-311G++(d,p) basis set/B3LYP approach was utilized to optimize organic chemical structure of the compound under investigation and Chem3D 15.0 software was used to create the original chemical structures. Both the Total Electron Density (TED) and the Electrostatic Surface (ESP) maps were examined at the same theoretical level. GaussSum3.0 software was used to compute and evaluate the total density of state (TDOS) for the optimized log file.

Equations of Koopmans' theory: The chemical potential ( $\mu$ ), maximal charge acceptance ( $\Delta N_{\text{max}}$ ), global hardness ( $\eta$ ), energy change ( $\Delta E$ ), electronegativity ( $\chi$ ), the global softness ( $\sigma$ ), electrophilicity index ( $\omega$ ), ionization potential (IP) and electron affinity (EA)

$$IP = -E_{\text{HOMO}}$$

$$EA = -E_{\text{LUMO}}$$

$$\mu =$$

$$(IP + EA)/2$$

$$\eta = (IP - EA)$$

$$\chi = -\eta$$

$$\omega = \mu^2/2$$

$$\eta) \sigma = 1/$$

$$\eta$$

$$\Delta N = -(\mu/\eta)$$

$$\Delta E = -\omega$$

$$E_{\text{gap}} = E_{\text{LUMO}} - E_{\text{HOMO}}$$

- ***In silico* ADMET studies**

ADMET descriptors (absorption, distribution, metabolism, excretion and toxicity) of the compounds were determined using Discovery studio 4.0. At first, the CHARMM force field was applied then the compounds were prepared and minimized according to the preparation of small molecule protocol. Then ADMET descriptors protocol was applied to carry out these studies

- ***In silico* toxicity studies**

The toxicity parameters of the synthesized compounds were calculated using Discovery studio 4.0. erlotinib was used as a reference drug. At first, the CHARMM force field was applied then the compounds were prepared and minimized according to the preparation of small molecule protocol. Then different parameters were calculated from the toxicity prediction (extensible) protocol.

- **Chemistry**

The melting point were carried out by open capillary method on a Gallen kamp Melting point apparatus. The infrared spectra were recorded on pye Unicam SP 1000 IR spectrophotometer using potassium bromide disc technique. Proton magnetic resonance  $^1\text{H}$ NMR spectra were recorded on a Bruker 400 Megahertz-nuclear magnetic resonance (400 MHZ-NMR) spectrophotometer. Carbon-13 ( $^{13}\text{C}$ ) nuclear magnetic resonance ( $^{13}\text{C}$ NMR) spectra were recorded on a Bruker 100 Megahertz-nuclear magnetic resonance (100 MHZ-NMR) spectrophotometer. Tetramethylsilane (TMS) was used as internal standard and chemical shifts were measured in  $\delta$  scale one part per million (ppm). The reactions were monitored by thin-layer chromatography (TLC) using TLC sheets precoated with UV fluorescent silica gel Merck 60 F254 plates and were visualized using ultraviolet (UV) lamp and different solvents as mobile phases.

### **General procedure for the synthesis of compound 5**

To a solution of the potassium salt of 3,7-dimethyl-3,7-dihydro-1*H*-purine-2,6-dione **2** (0.001 mol, 0.25g) in dry DMF (10 mL), *N*-benzyl-2-chloroacetamide **4** (0.001 mol, 0.21g) was added and the mixture was heated using water-bath for 5 h. The reaction mixture was then poured onto ice-water (200 mL) and stirred for 30 min. The formed precipitate was filtered, washed with water and crystallized from ethanol to get the final target compound **5**.

#### ***N*-Benzyl-2-(3,7-dimethyl-2,6-dioxo-2,3,6,7-tetrahydro-1*H*-purin-1-yl)acetamide (5)**

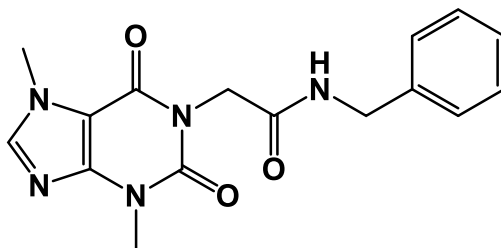

Off-white crystal (yield, 84 %); m. p. = 257-259 °C; IR (KBr)  $\nu$  cm<sup>-1</sup>: 3282, 3108 (NH), 2929 (CH aliphatic), 1711, 1656 (C=O); <sup>1</sup>H NMR (400 MHz, DMSO-*d*<sub>6</sub>)  $\delta$  8.61 (t, *J* = 5.9 Hz, 1H), 8.07 (s, 1H), 7.37 – 7.31 (m, 2H), 7.26 (d, *J* = 7.5 Hz, 3H), 4.52 (s, 2H), 4.30 (d, *J* = 5.9 Hz, 2H), 3.90 (s, 3H), 3.44 (s, 3H); <sup>13</sup>C NMR (101 MHz, DMSO-*d*<sub>6</sub>)  $\delta$  167.50, 154.73, 151.39, 148.97, 143.53, 139.72, 128.75 (2C), 127.57 (2C), 127.25, 107.18, 43.44, 42.52, 33.67, 29.91. For C<sub>16</sub>H<sub>17</sub>N<sub>5</sub>O<sub>3</sub> (327.34).

## **• Biological evaluations**

### **1- Mammalian cell lines culture**

A549 and HCT 116 cell lines were cultured on DMEM media. The cultured media were supplemented with 200 mM L-glutamine, 10.0% fetal bovine serum (Lonza), and 1.0% penicillin/streptomycin. Cells were seeded into 25.0 cm tissue culture flasks and incubated at 37°C in a 5.0% CO<sub>2</sub> incubator for 24 h or till confluency.

### **2- Safety assay**

The safety profiles of the tested compounds were checked on one non-cancerous cell line (W138) to determine the treatments concentrations that do not depict toxic effects against the



tested cells. A portion of 100.0  $\mu$ l of  $6 \times 10^4$  cell/ml cells was seeded into each well of a 96-well plate and then the plates were incubated at 37°C in a humidified 5.0% CO<sub>2</sub> incubator for 24 h. At the end of incubation period, the exhausted medium was replaced with 100.0  $\mu$ l of different concentrations of the designated treatment (prepared in RPMI medium starting from 1.0 mM). The inoculated plates were incubated at the same growth conditions for another 24 h. At the end of incubation, cellular viability was assessed using MTS assay kit (Promega) according to the manual instruction

### 3- *In-vitro* anticancer activity

Anticancer activities of the tested compounds against A549 and HCT 116 cell lines were quantified using MTS assay kit (Promega) as described by the Manufacturer.

### 4- Selectivity index (SI)

The selectivity index values of the tested compounds on cancer cells were calculated as described by Koch et al., with slight modifications;  $SI = IC_{50nc}/IC_{50cc}$ , where  $IC_{50nc}$ : the  $IC_{50}$  value of the tested compound on normal cells and  $IC_{50cc}$ :  $IC_{50}$  of the tested compound on cancer cell line.

### 5- *In vitro* EGFR kinase assay

The synthesized compound was estimated for their *in vitro* inhibition on human EGFR in MCF-7 cell line; using ELISA kit. Firstly, a plate was used for the assay had been coated by an antibody specific for human EGFR enzyme, Erlotinib was nominated as a standard EGFR inhibitor. Both standard and sample were added to the wells and incubated overnight at 4 °C, then washed. The biotinylated antibody was supplemented and further incubated for 1 h at room temperature. The unreacted, liberated antibody was then washed; followed by addition of HRP-conjugated streptavidin and incubated for 45 min at room temperature. Wells were washed and a TMB substrate solution was added and kept at room temperature for 30 min. Finally, the stop solution was added, and the intensity of the color produced was measured at 450 nm. Concentration-inhibition response curve was established by GraphPad Prism 5.0. The  $IC_{50}$  value was calculated as the concentration at which 50% of the cells could survive in comparison to erlotinib.

## **6- Flow cytometry analysis for cell cycle**

To determine the role of the synthesized compound in cell cycle distribution, cell cycle analysis was performed using propidium iodide (PI) staining and flow cytometry analysis for compound **XI**. Flow Cytometry Kit for Cell Cycle Analysis (ab139418\_Propidium Iodide Flow Cytometry Kit/BD) was used in this test. A549 cells were treated with compound **XI** (21.99  $\mu$ M) for 72 h. Then, the cells were fixed in 70% ethanol at 4 °C for 12 h. After that, the cells were washed with cold PBS, incubated with 100  $\mu$ l RNase A at 37 °C for 30 min, and stained with 400  $\mu$ l PI in the dark at room temperature for further 30 min. The stained cells were measured using Epics XL-MCL™ Flow Cytometer (Beckman Coulter), and the data were analyzed using Flowing software (version 2.5.1, Turku Centre for Biotechnology, Turku, Finland).

## **7- Flow cytometry analysis for apoptosis**

Flow cytometry cell apoptosis analysis was used to investigate the apoptotic effect of the synthesized compound. A549 cells were treated with compound **XI** (21.99  $\mu$ M) for 72h, collected by trypsin, centrifuged, washed two successive times with PBS, suspended in 500  $\mu$ l binding buffer, and double stained with 5  $\mu$ l Annexin V-FITC and 5  $\mu$ l PI in the dark at room temperature for 15 min. The stained cells were measured using Epics XL-MCL™ Flow Cytometer and analyzed using Flowing software.

# Spectral data

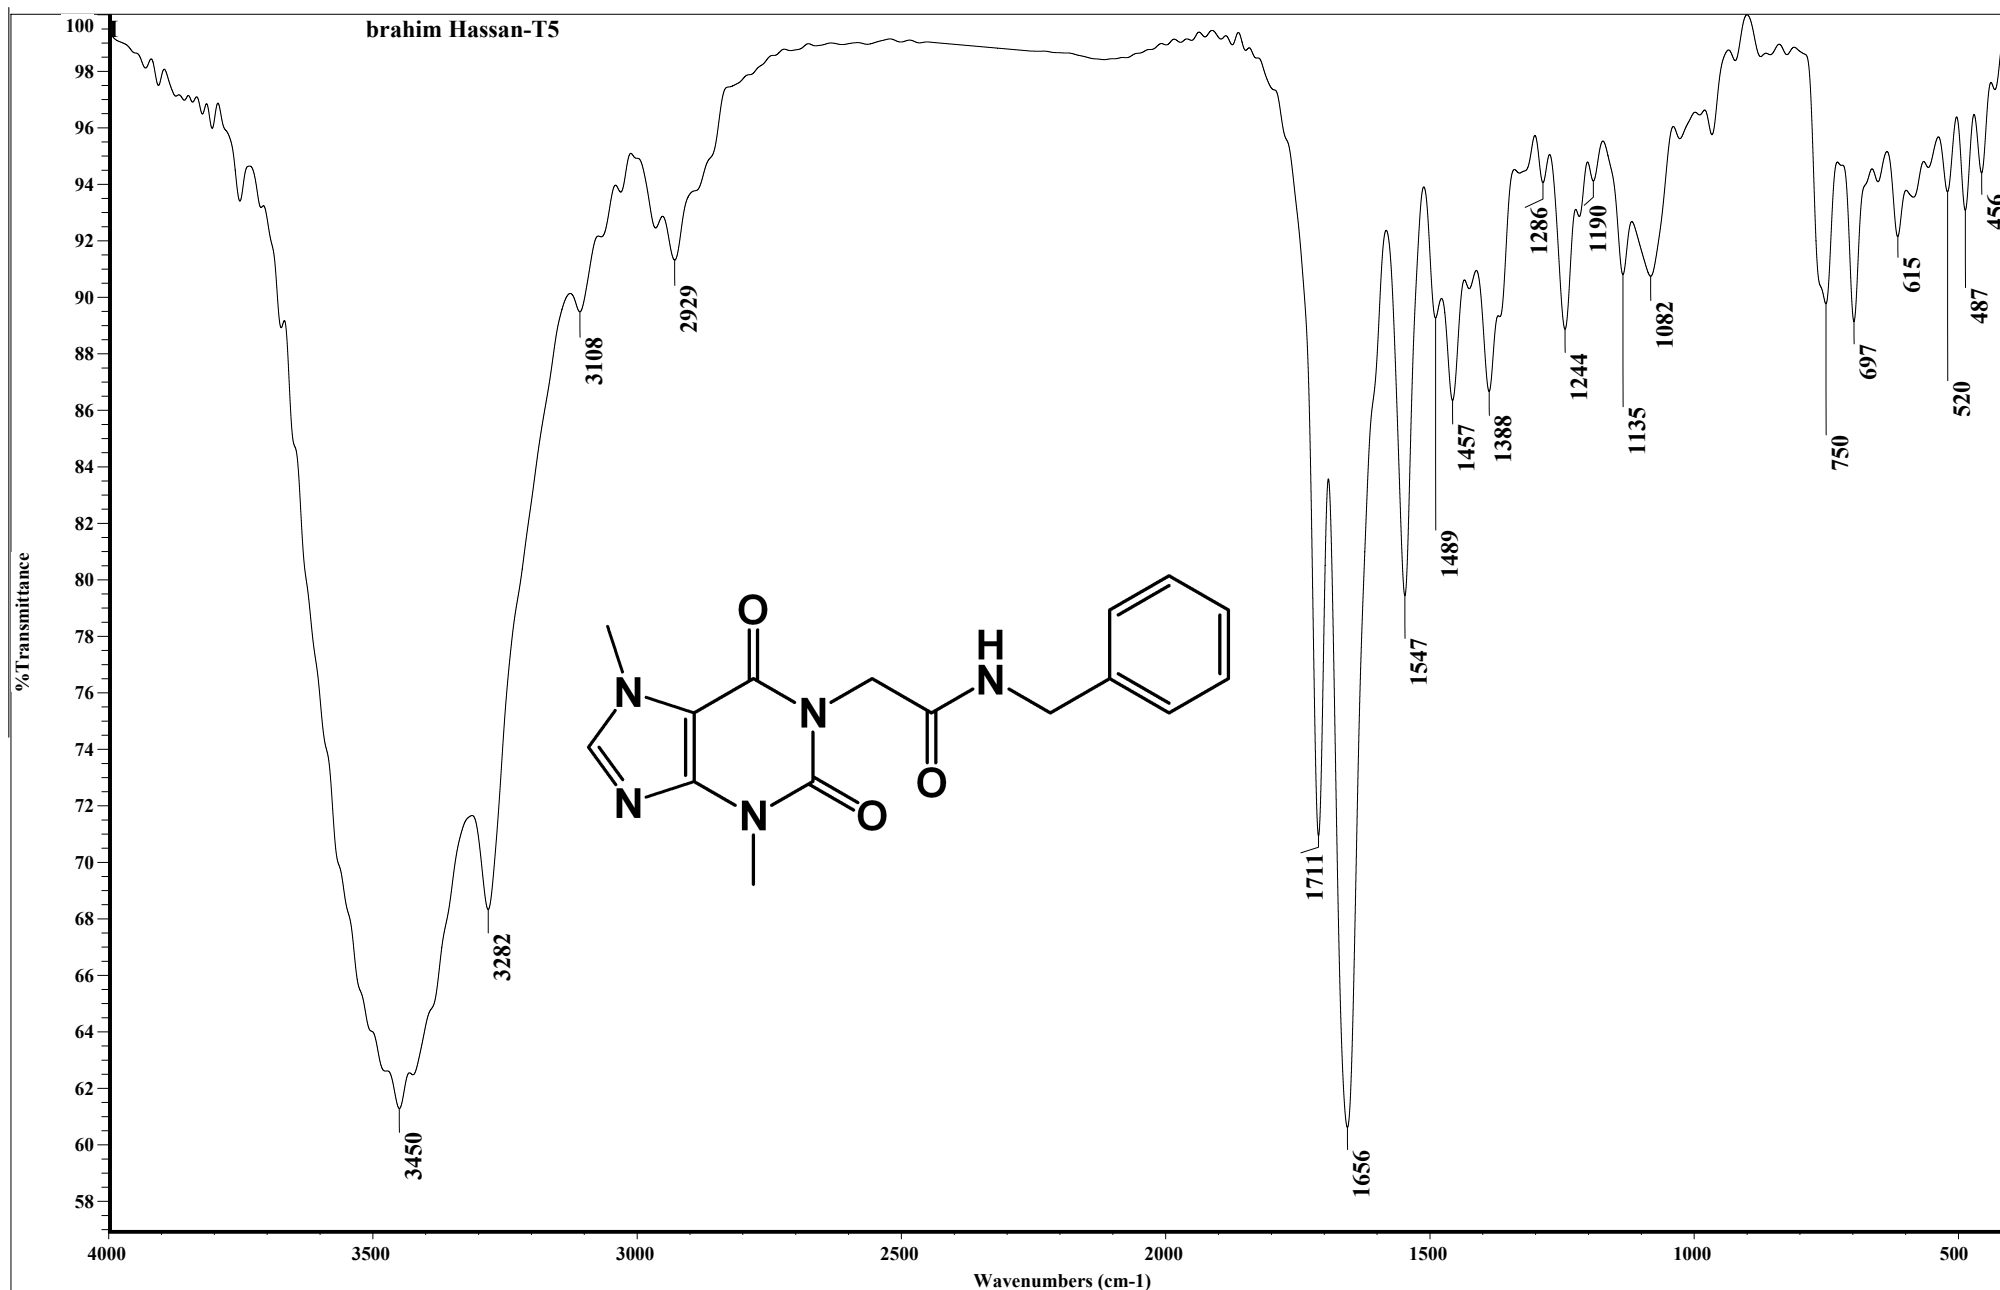

Number of sample scans: 32  
Number of background scans: 32  
Resolution: 8.000  
Sample gain: 1.0  
Optical velocity: 0.4747  
Aperture: 150.00

**ThermoFisher**  
SCIENTIFIC

Mon Jun 20 11:57:37 2022 (GMT+02:00)

*Mansoura University*  
*Faculty of Science*  
*Spectral Analysis Unit*  
*unitofspectra@gmail.com*

1H NMR of 5

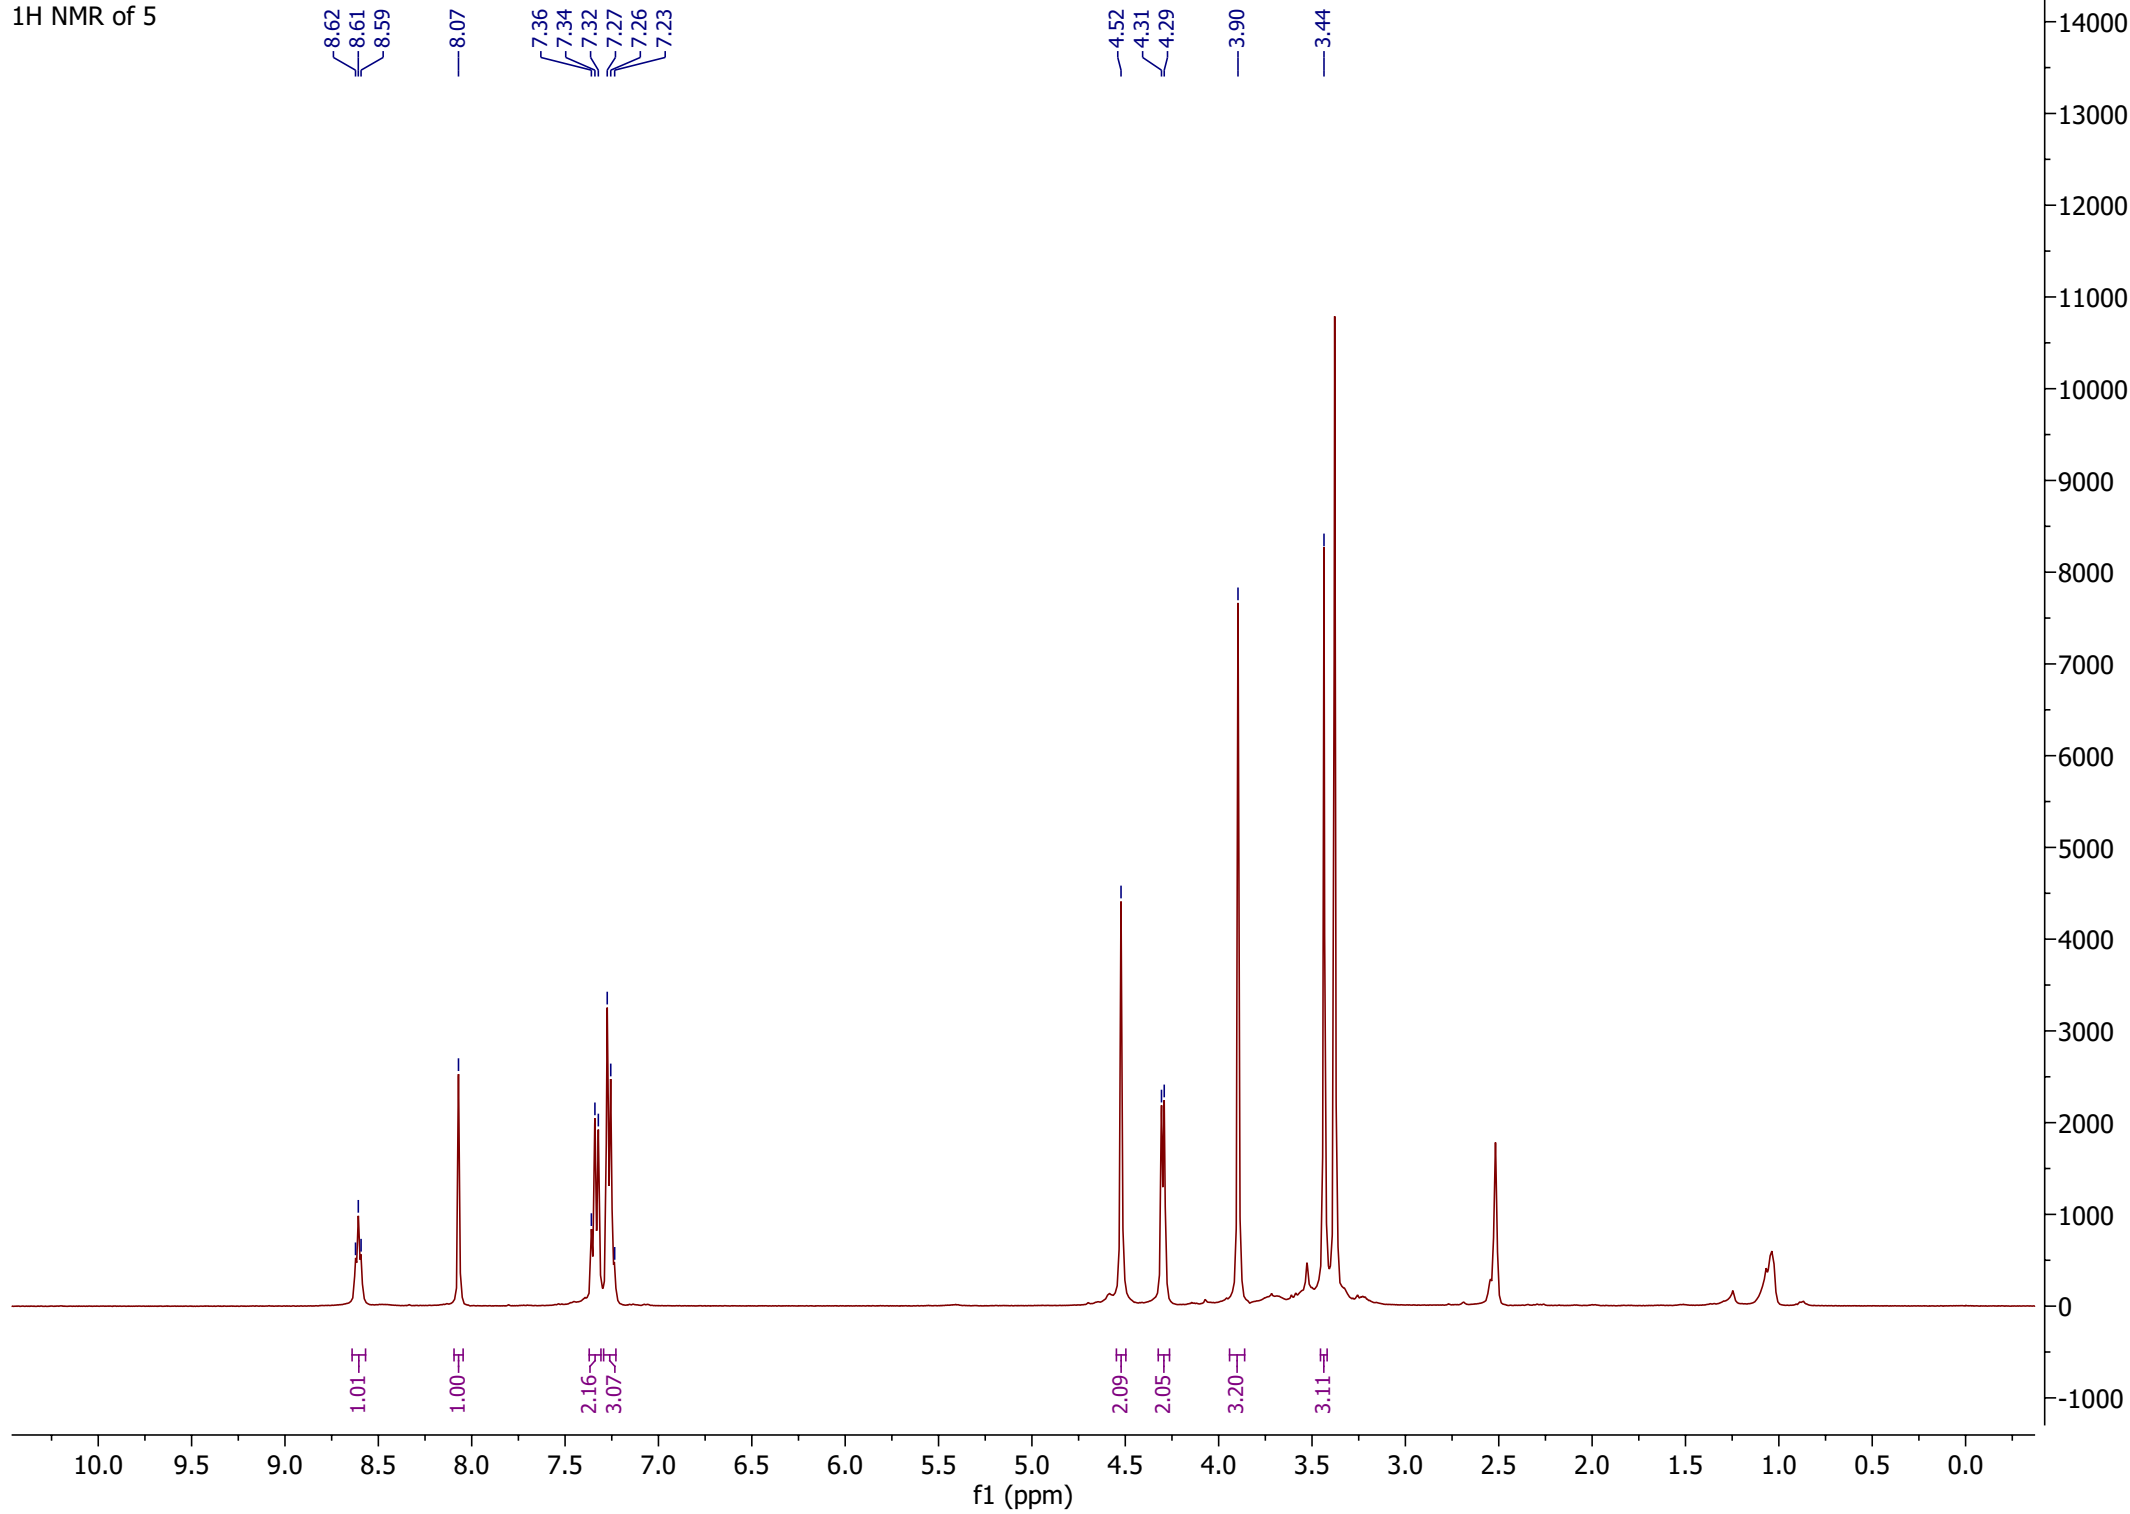

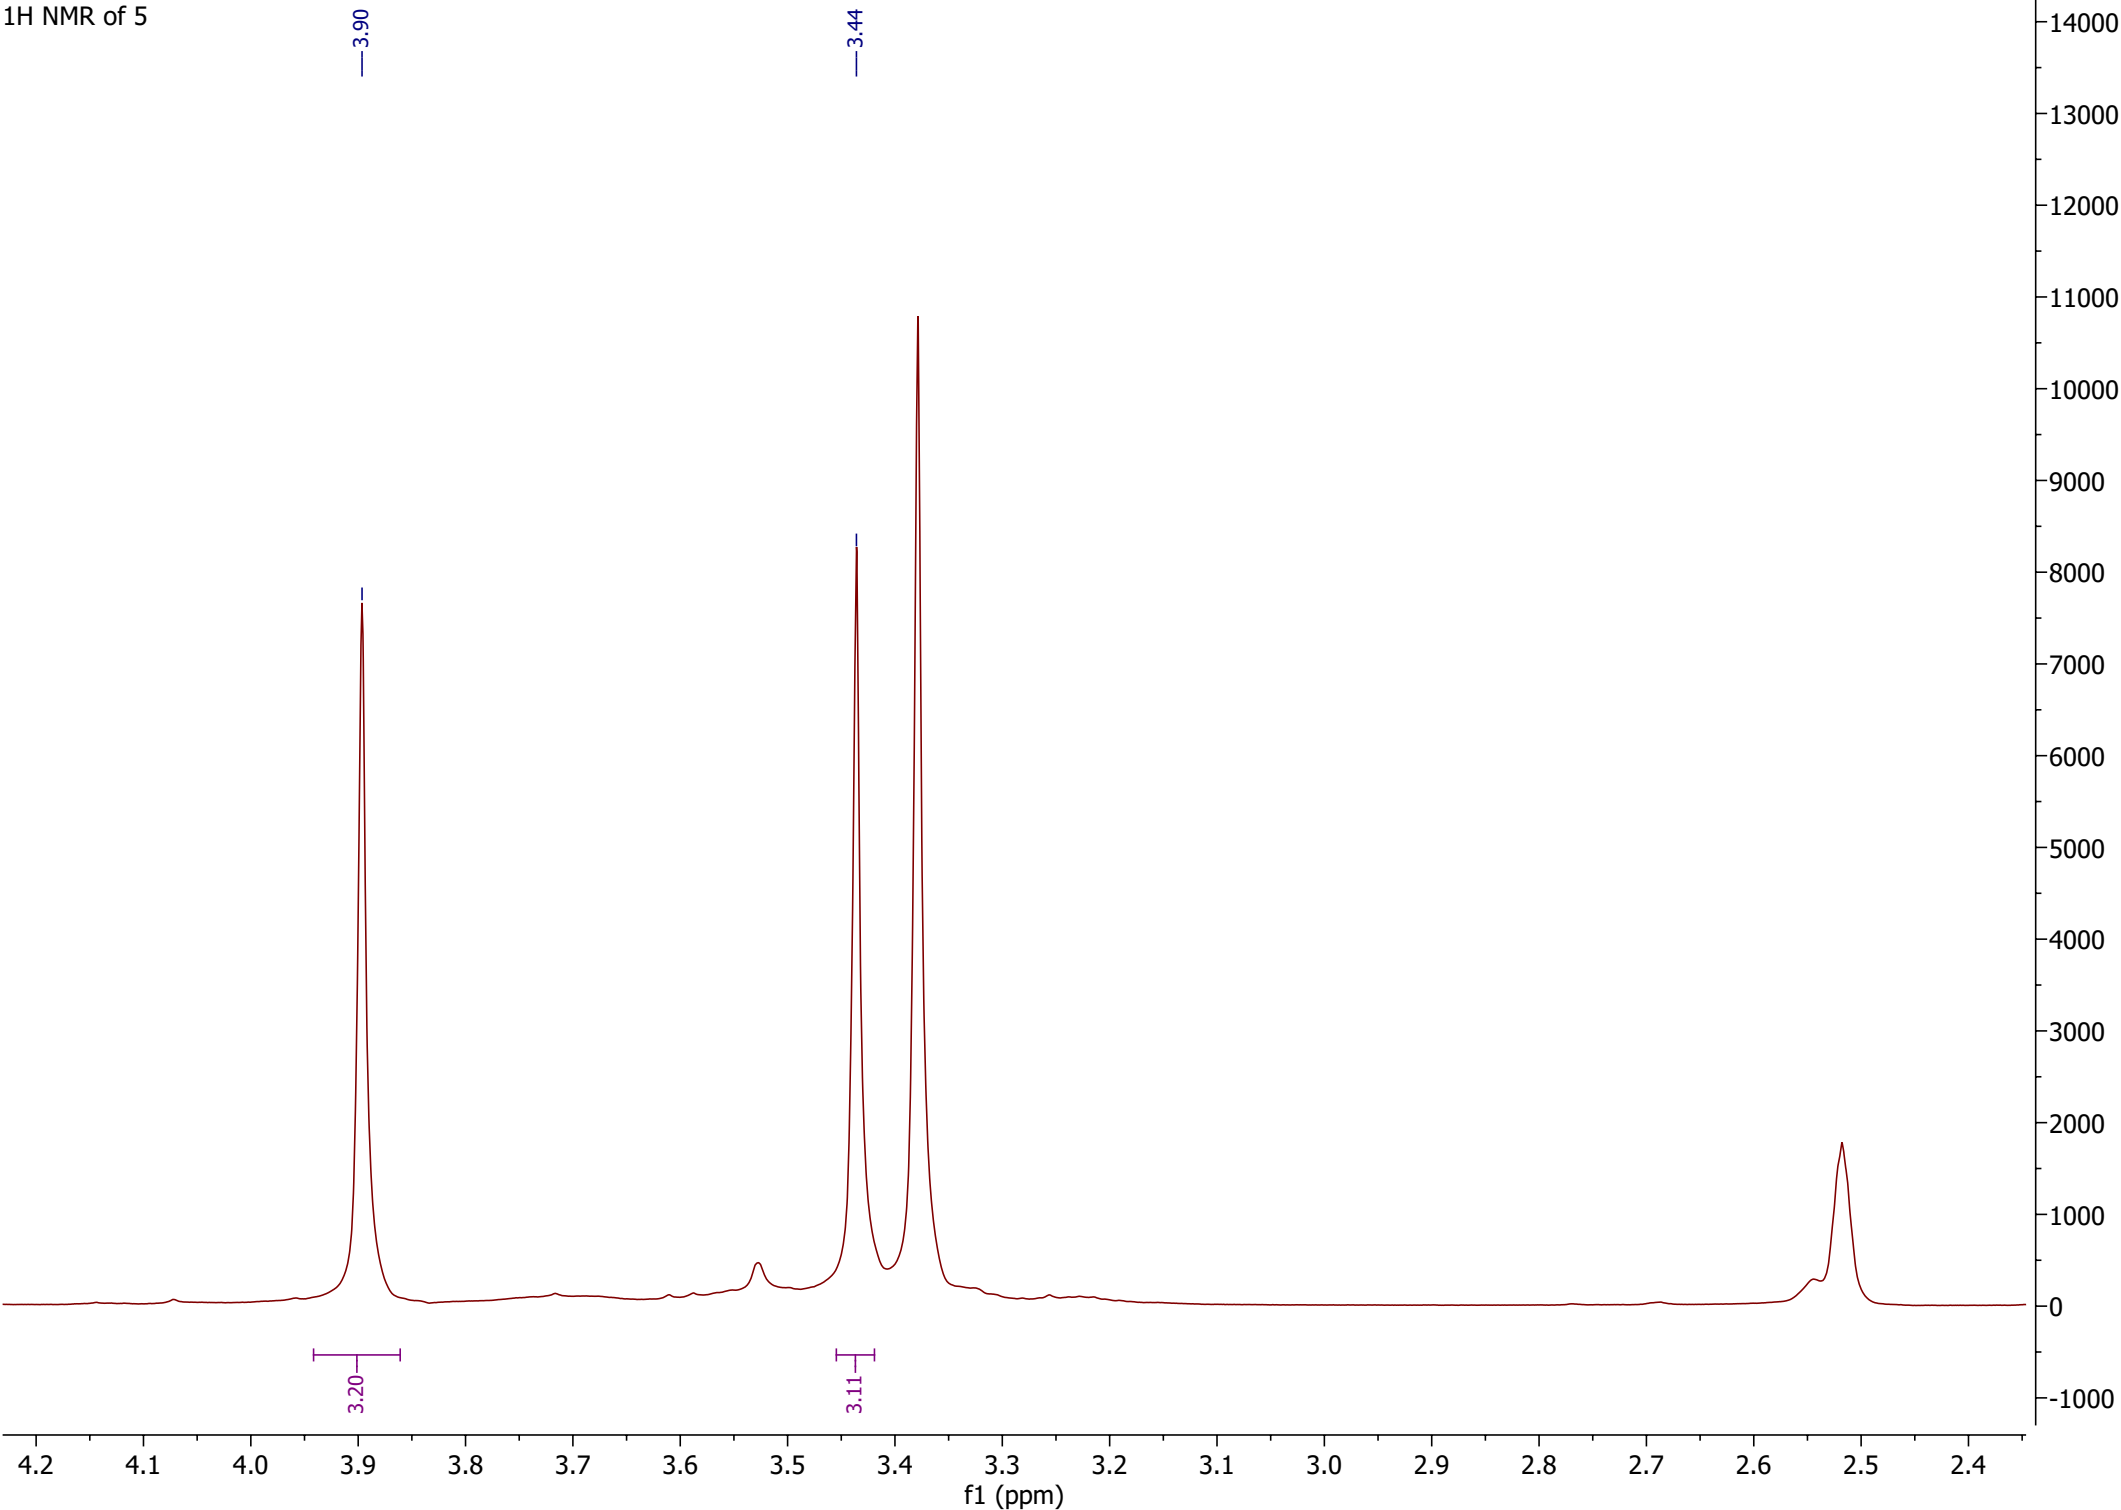

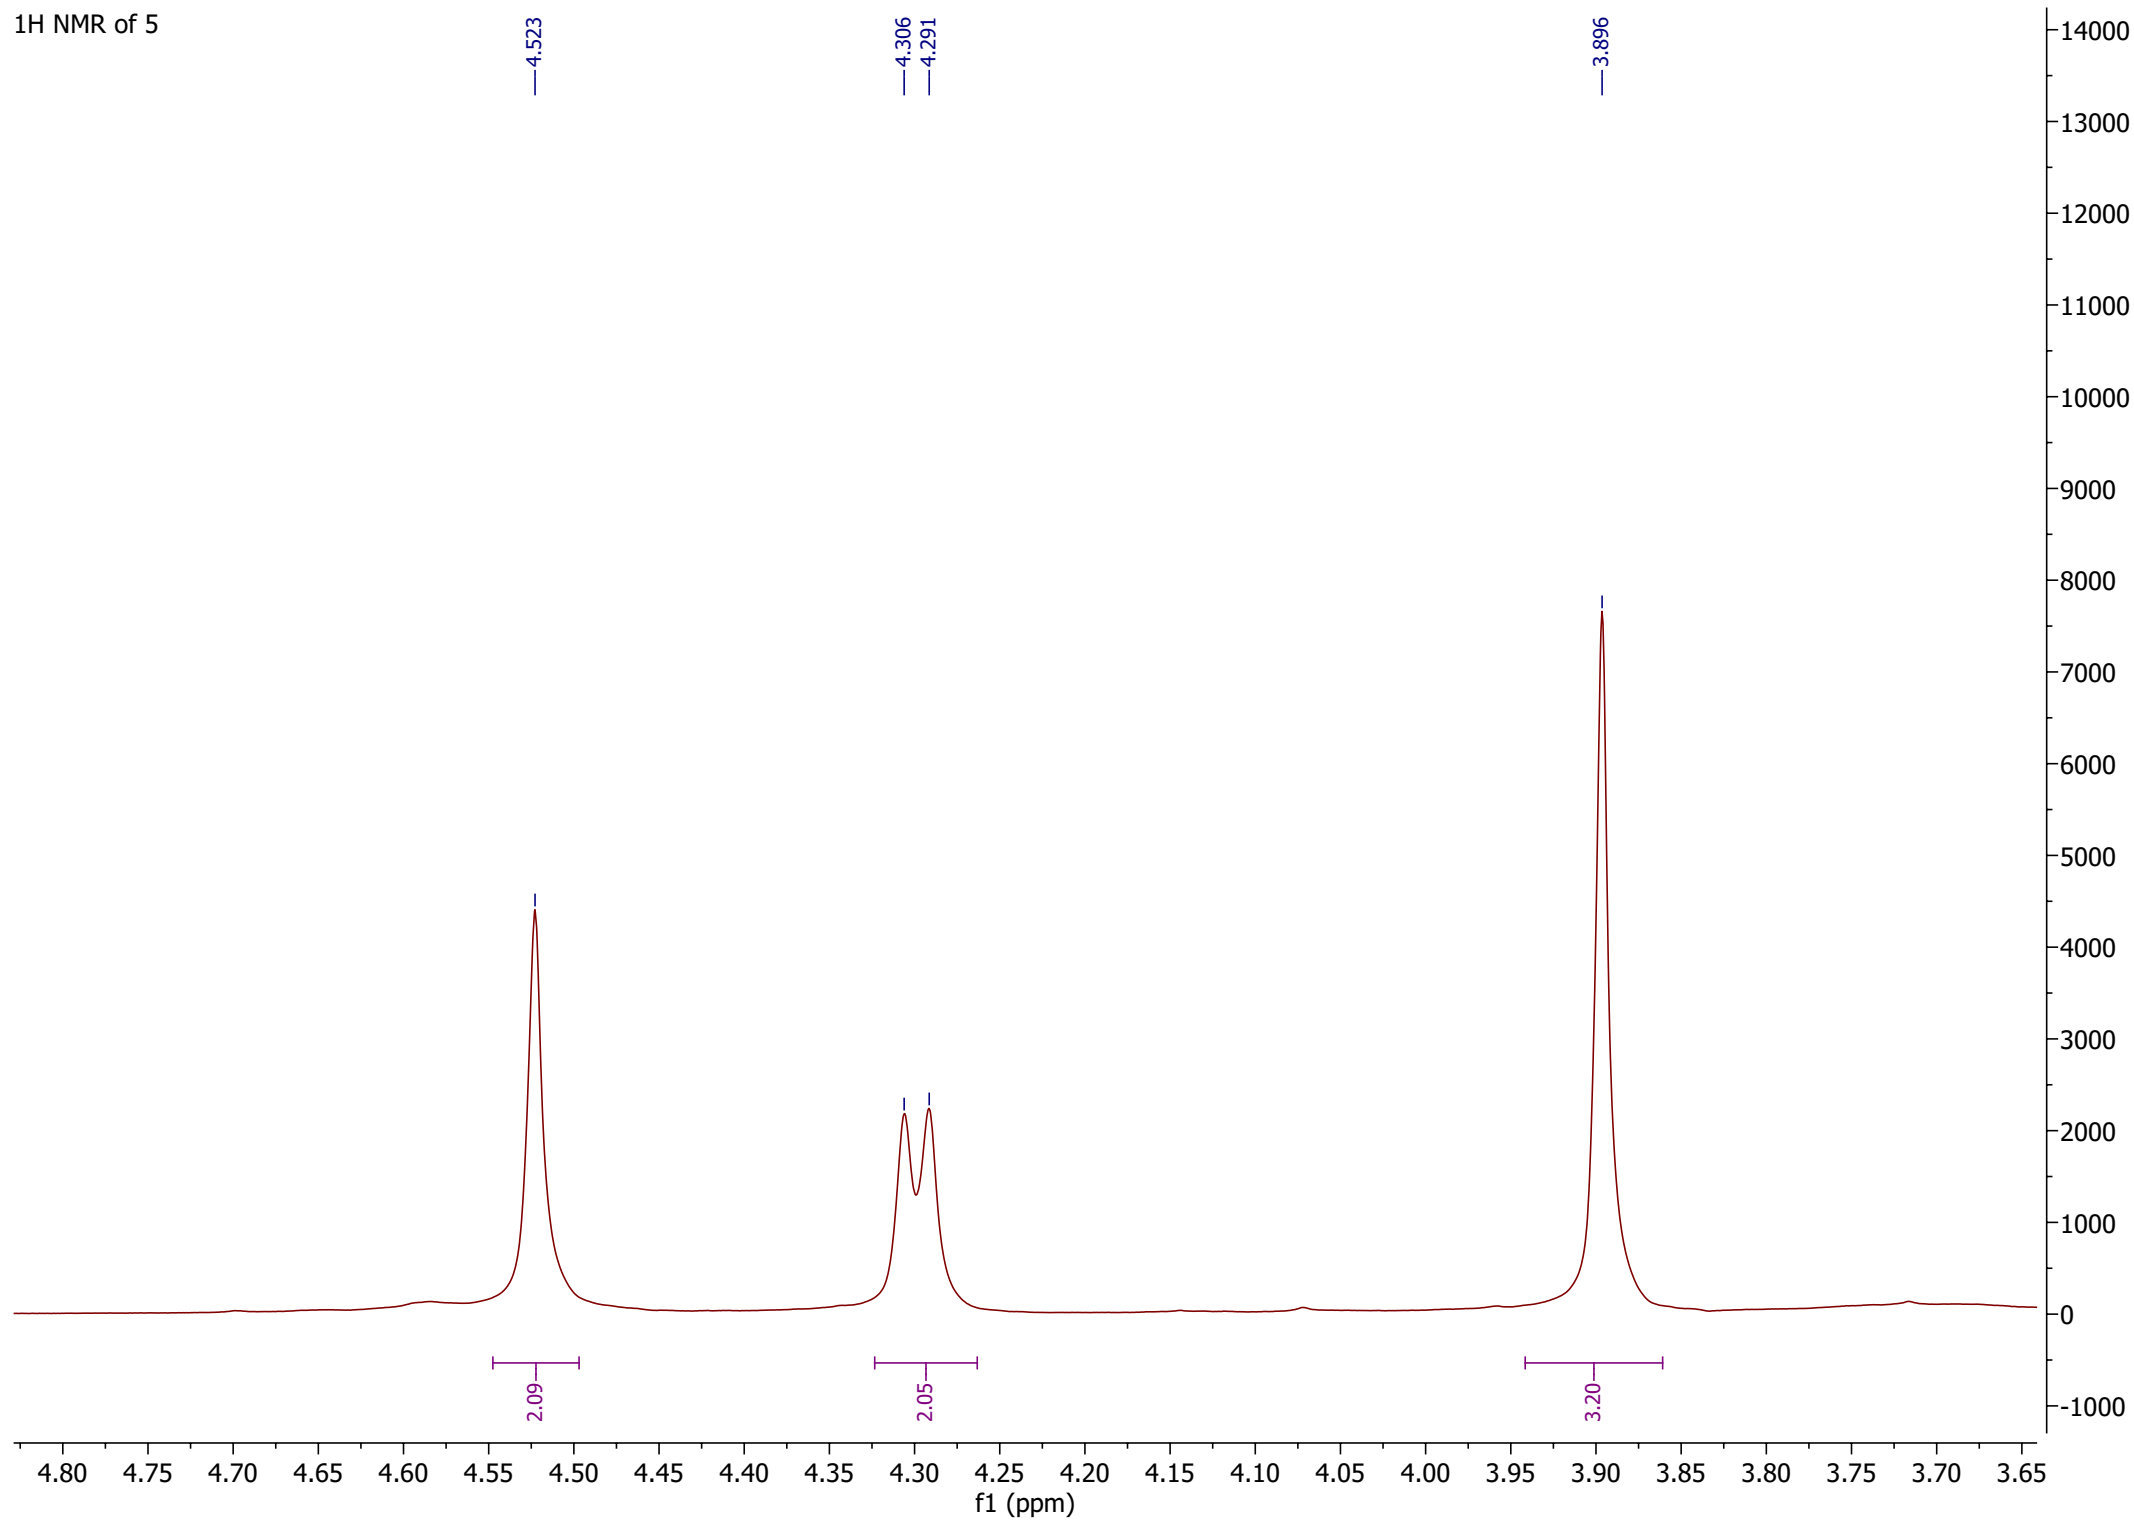

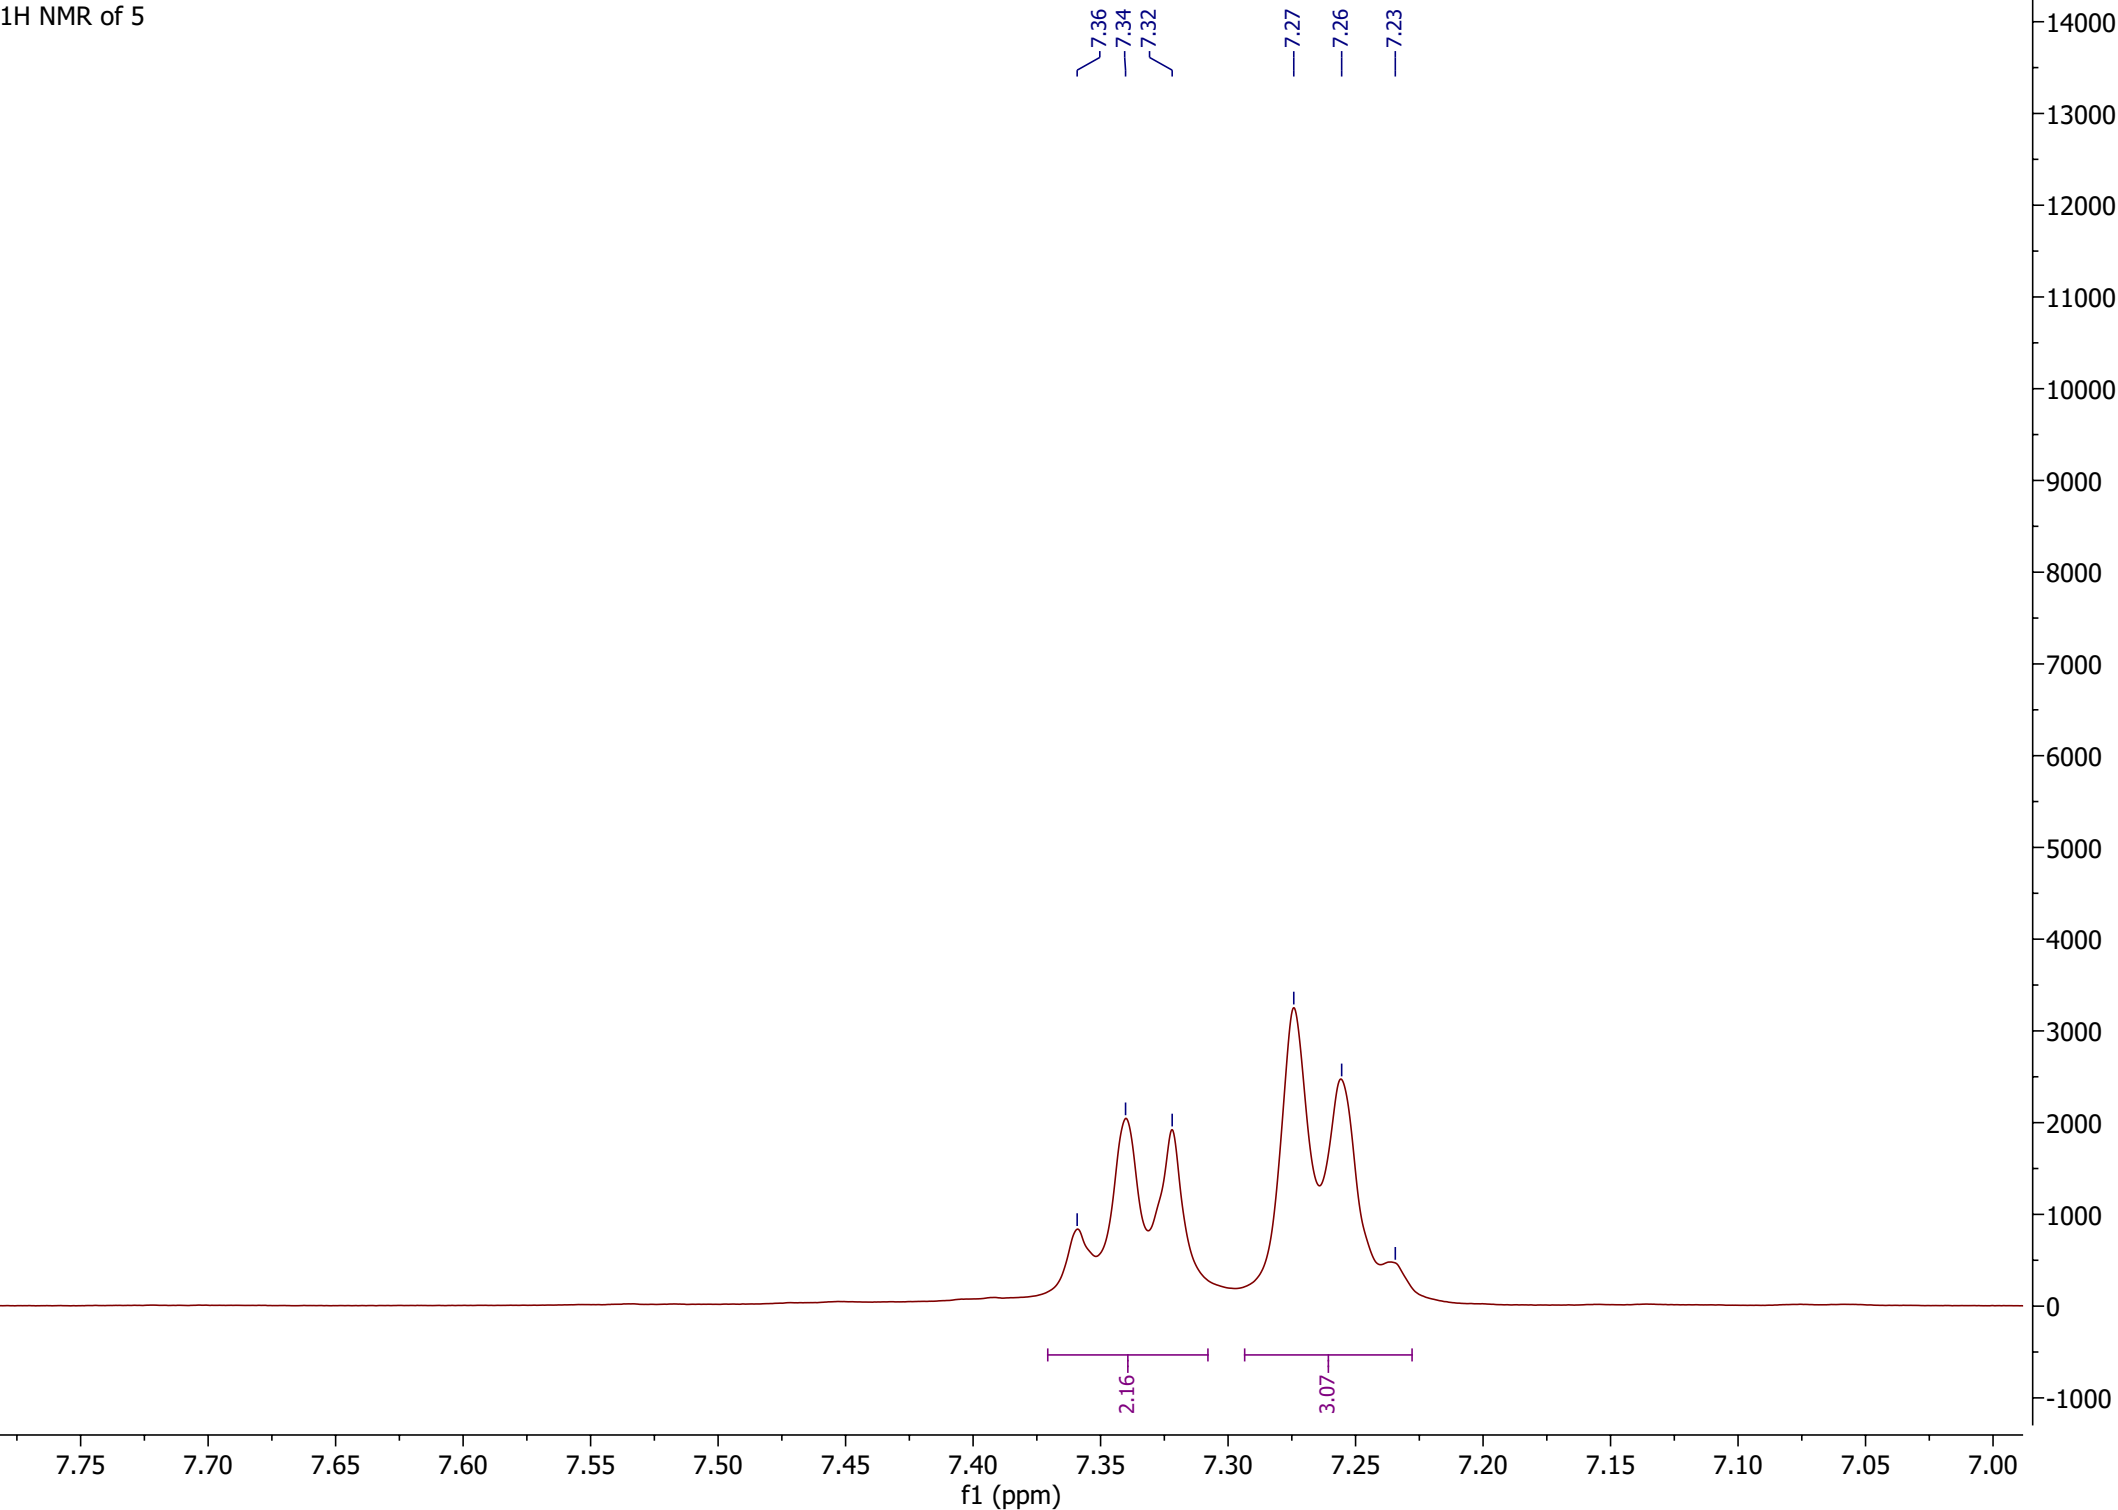



1H NMR of 5

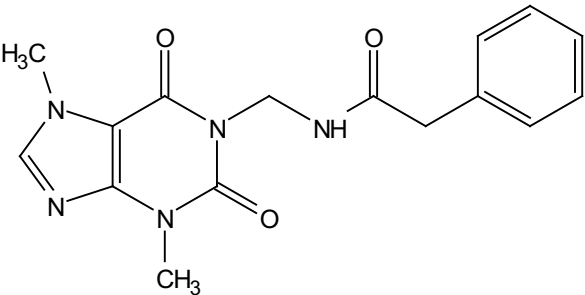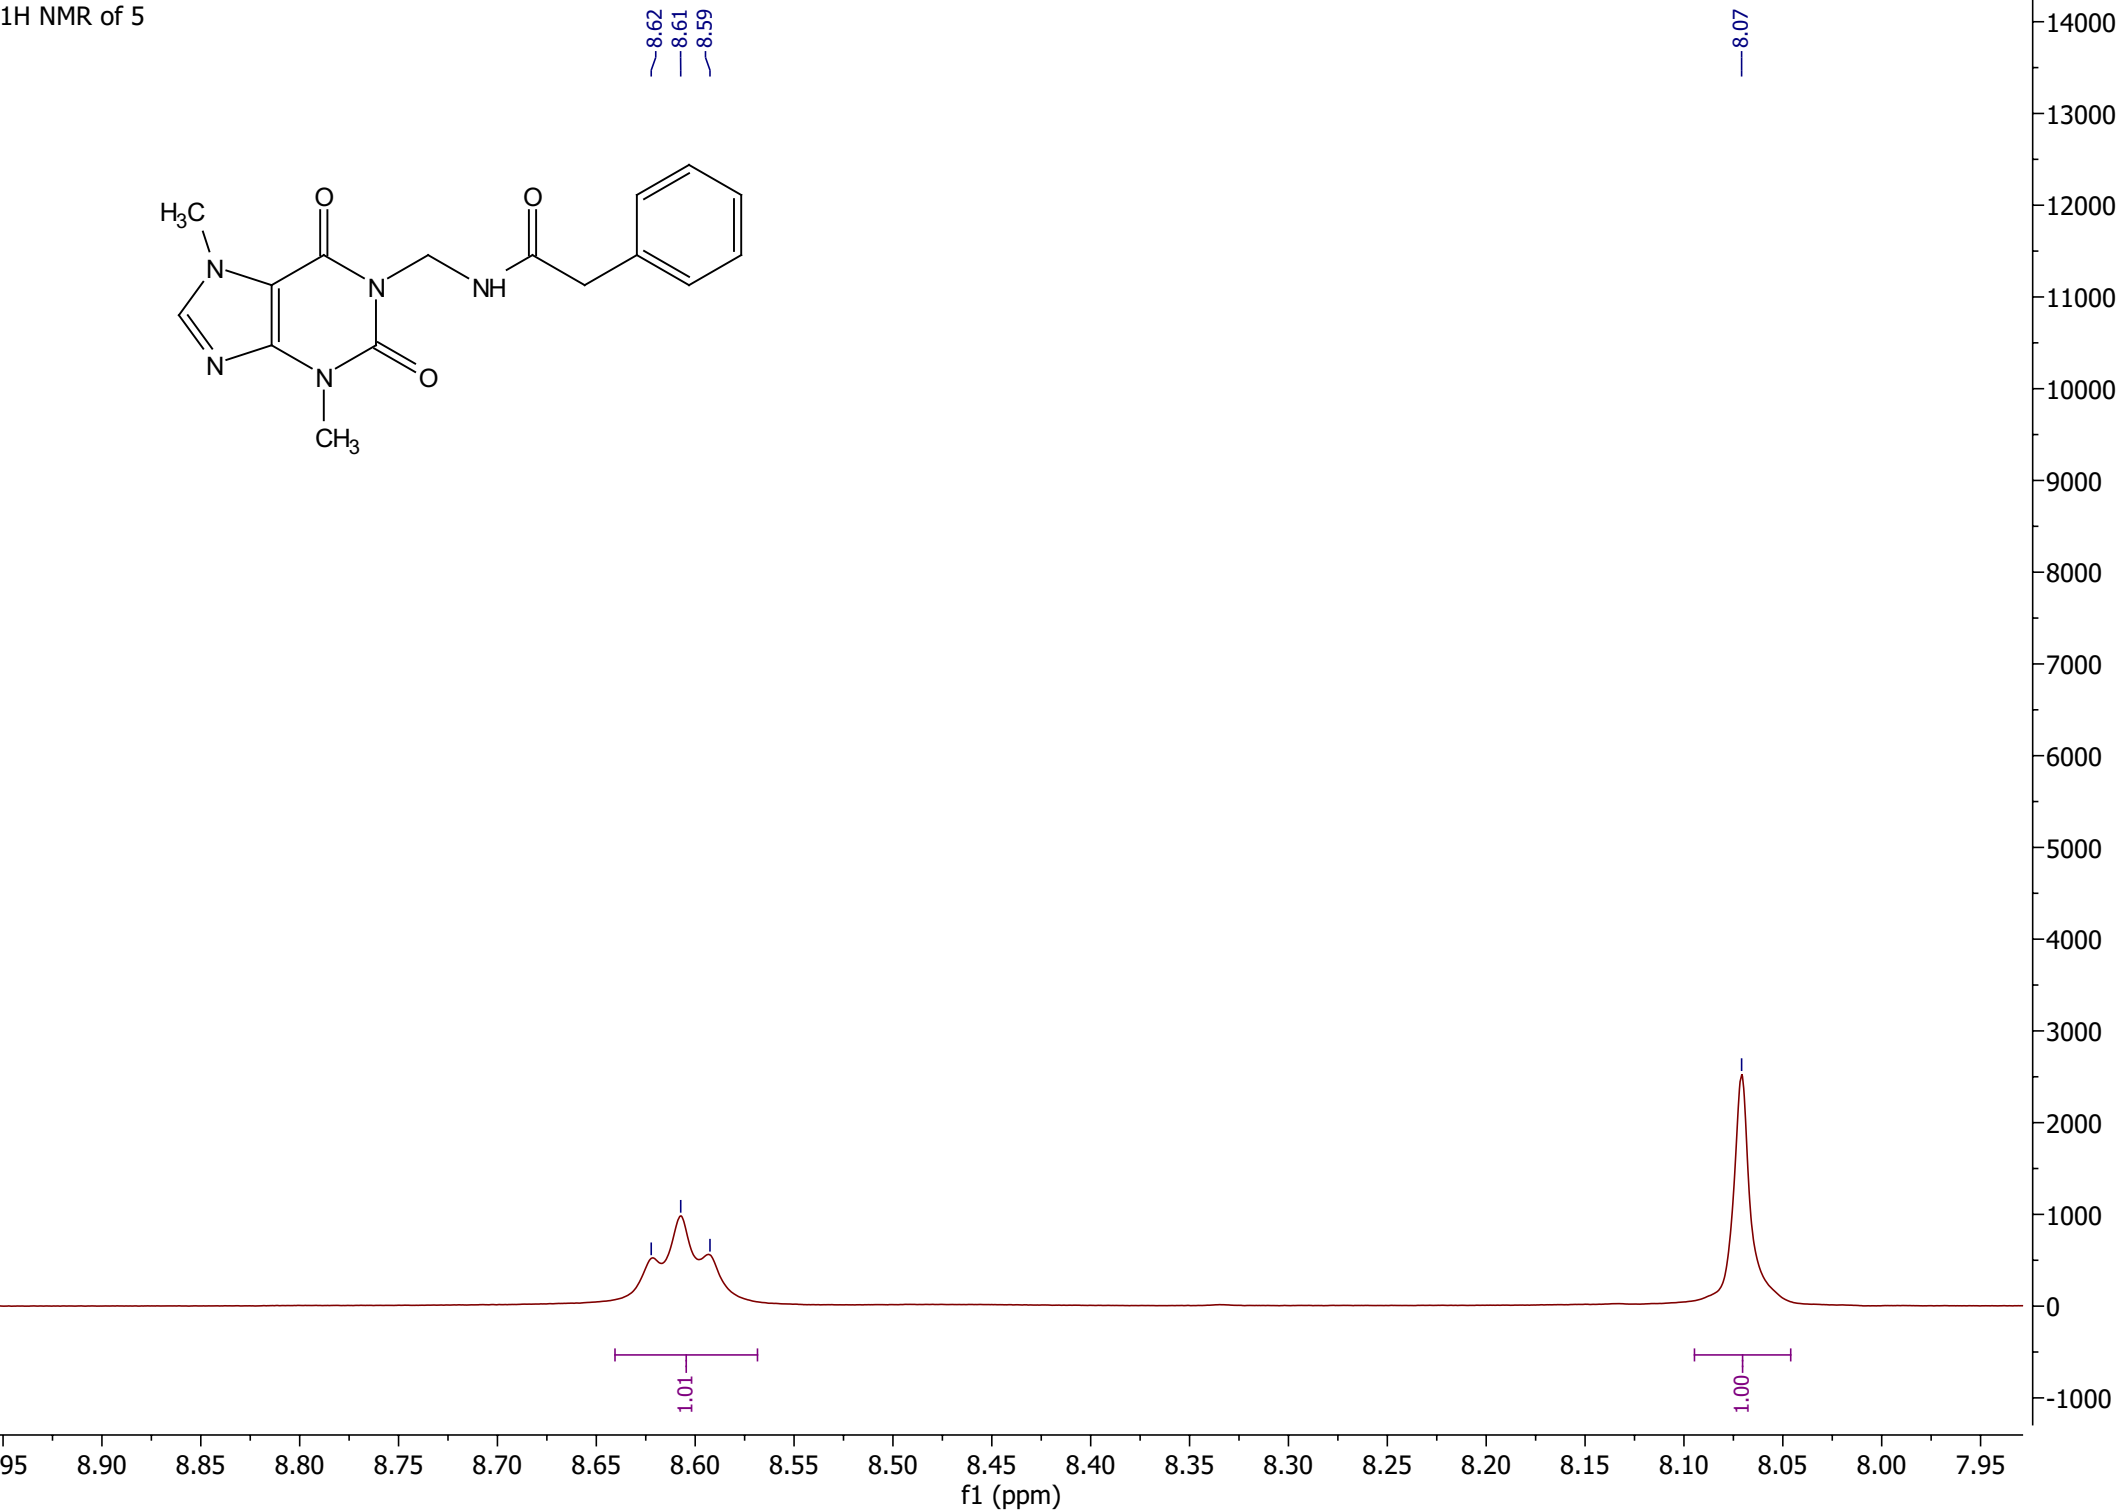

<sup>13</sup>C NMR of 5

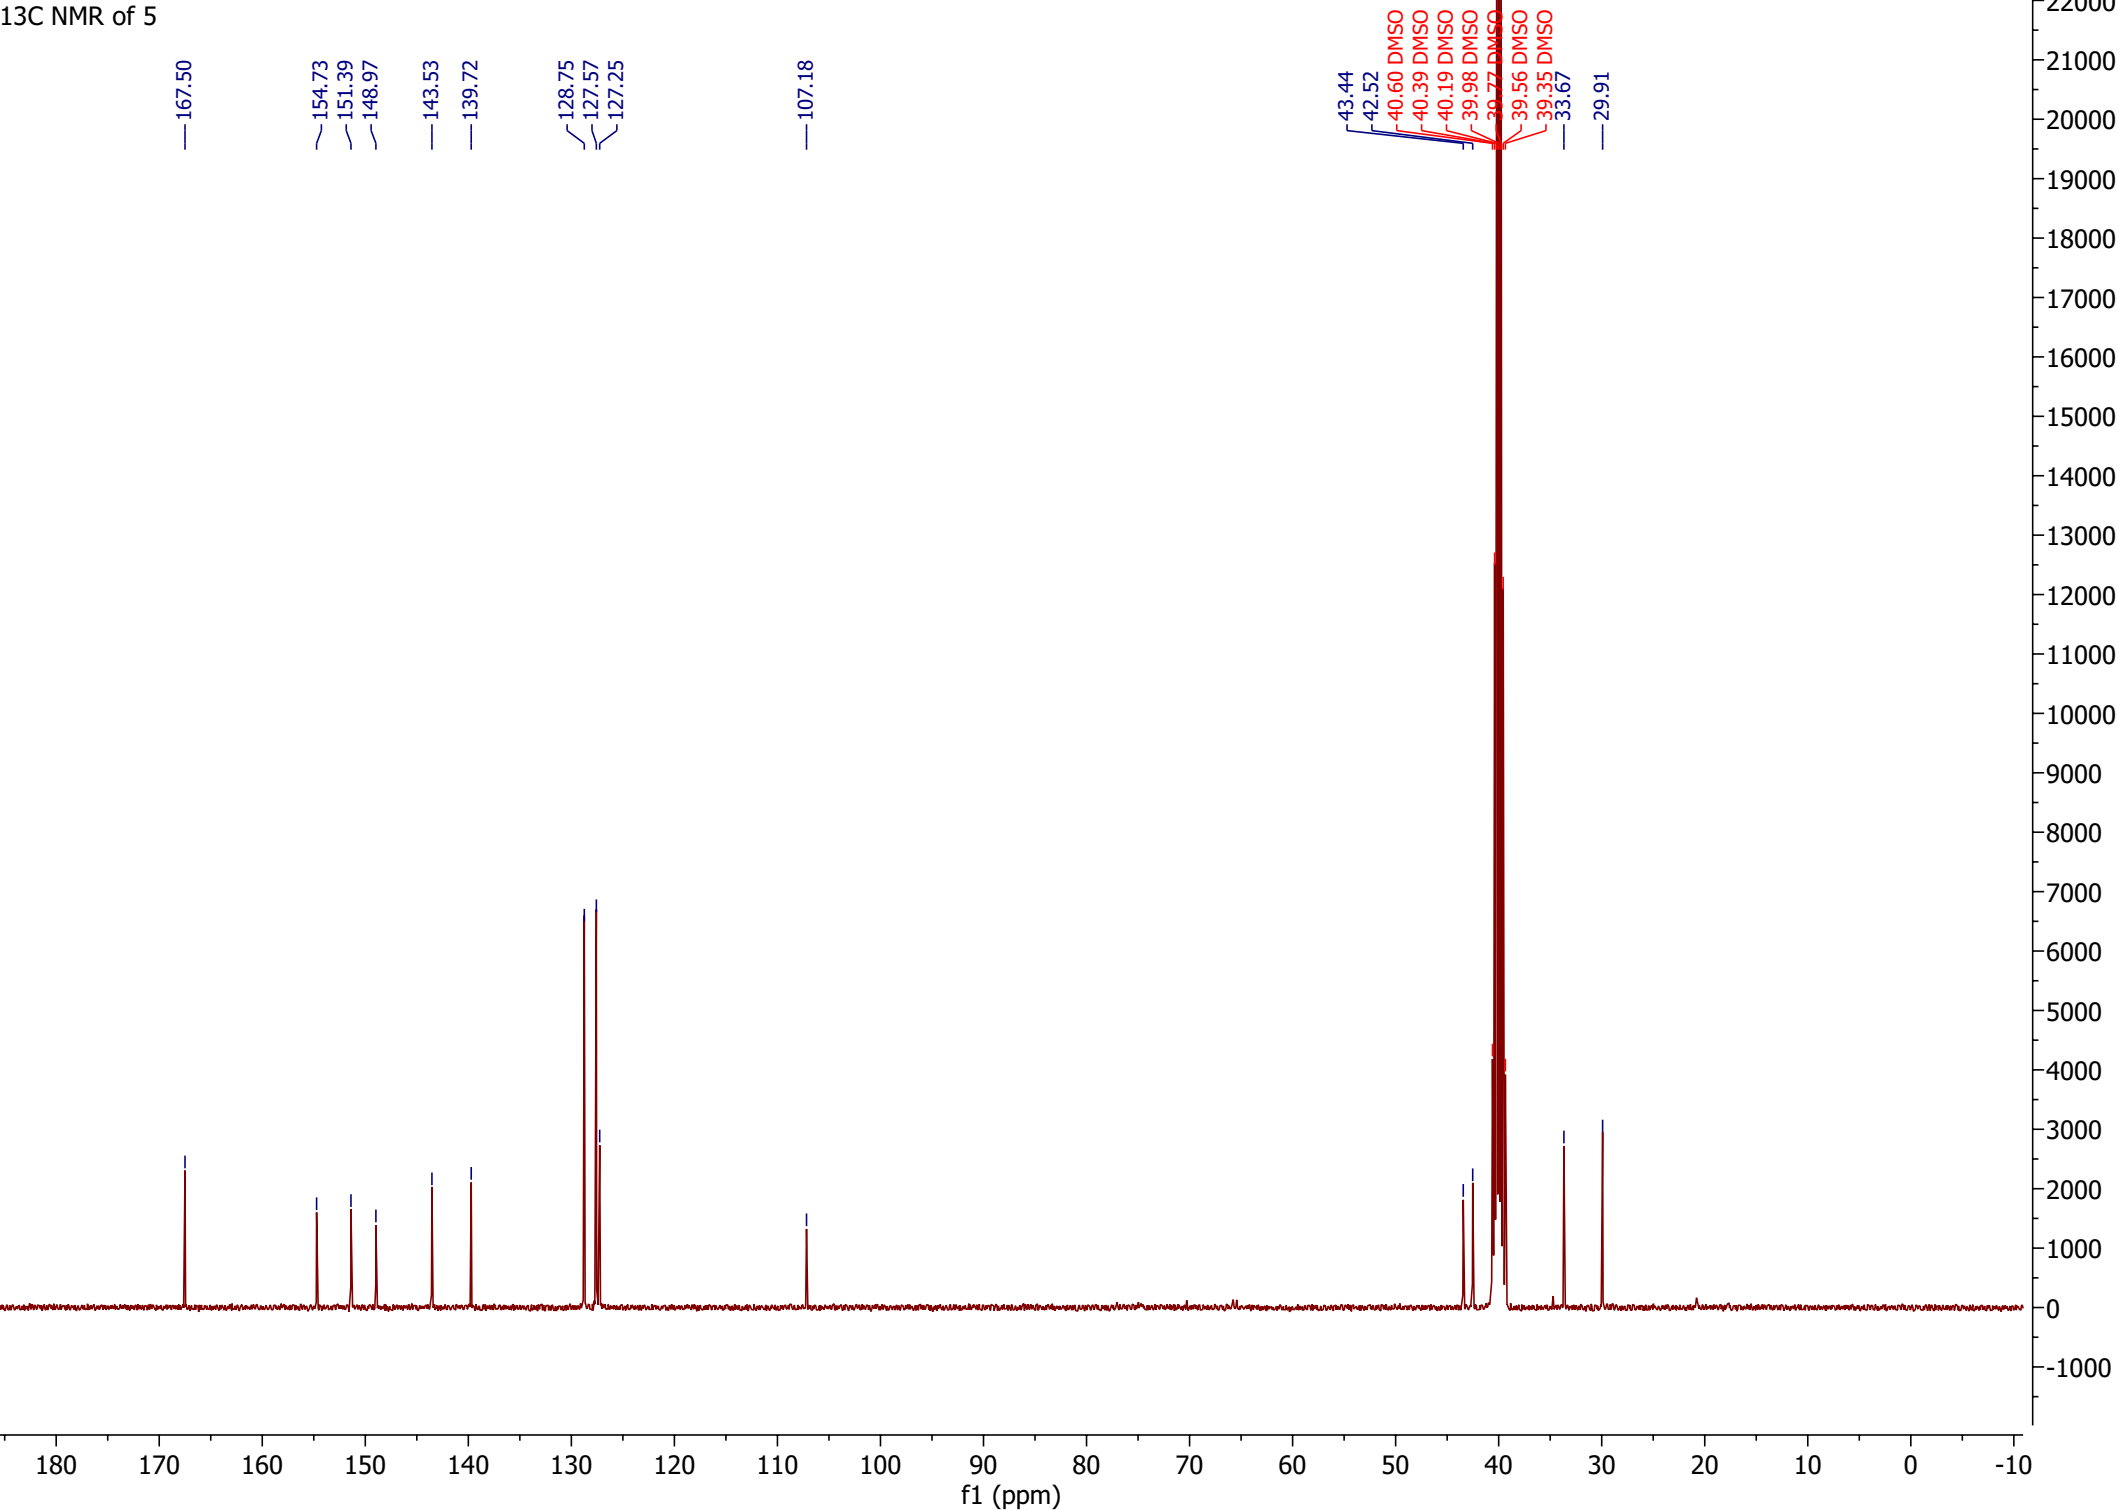

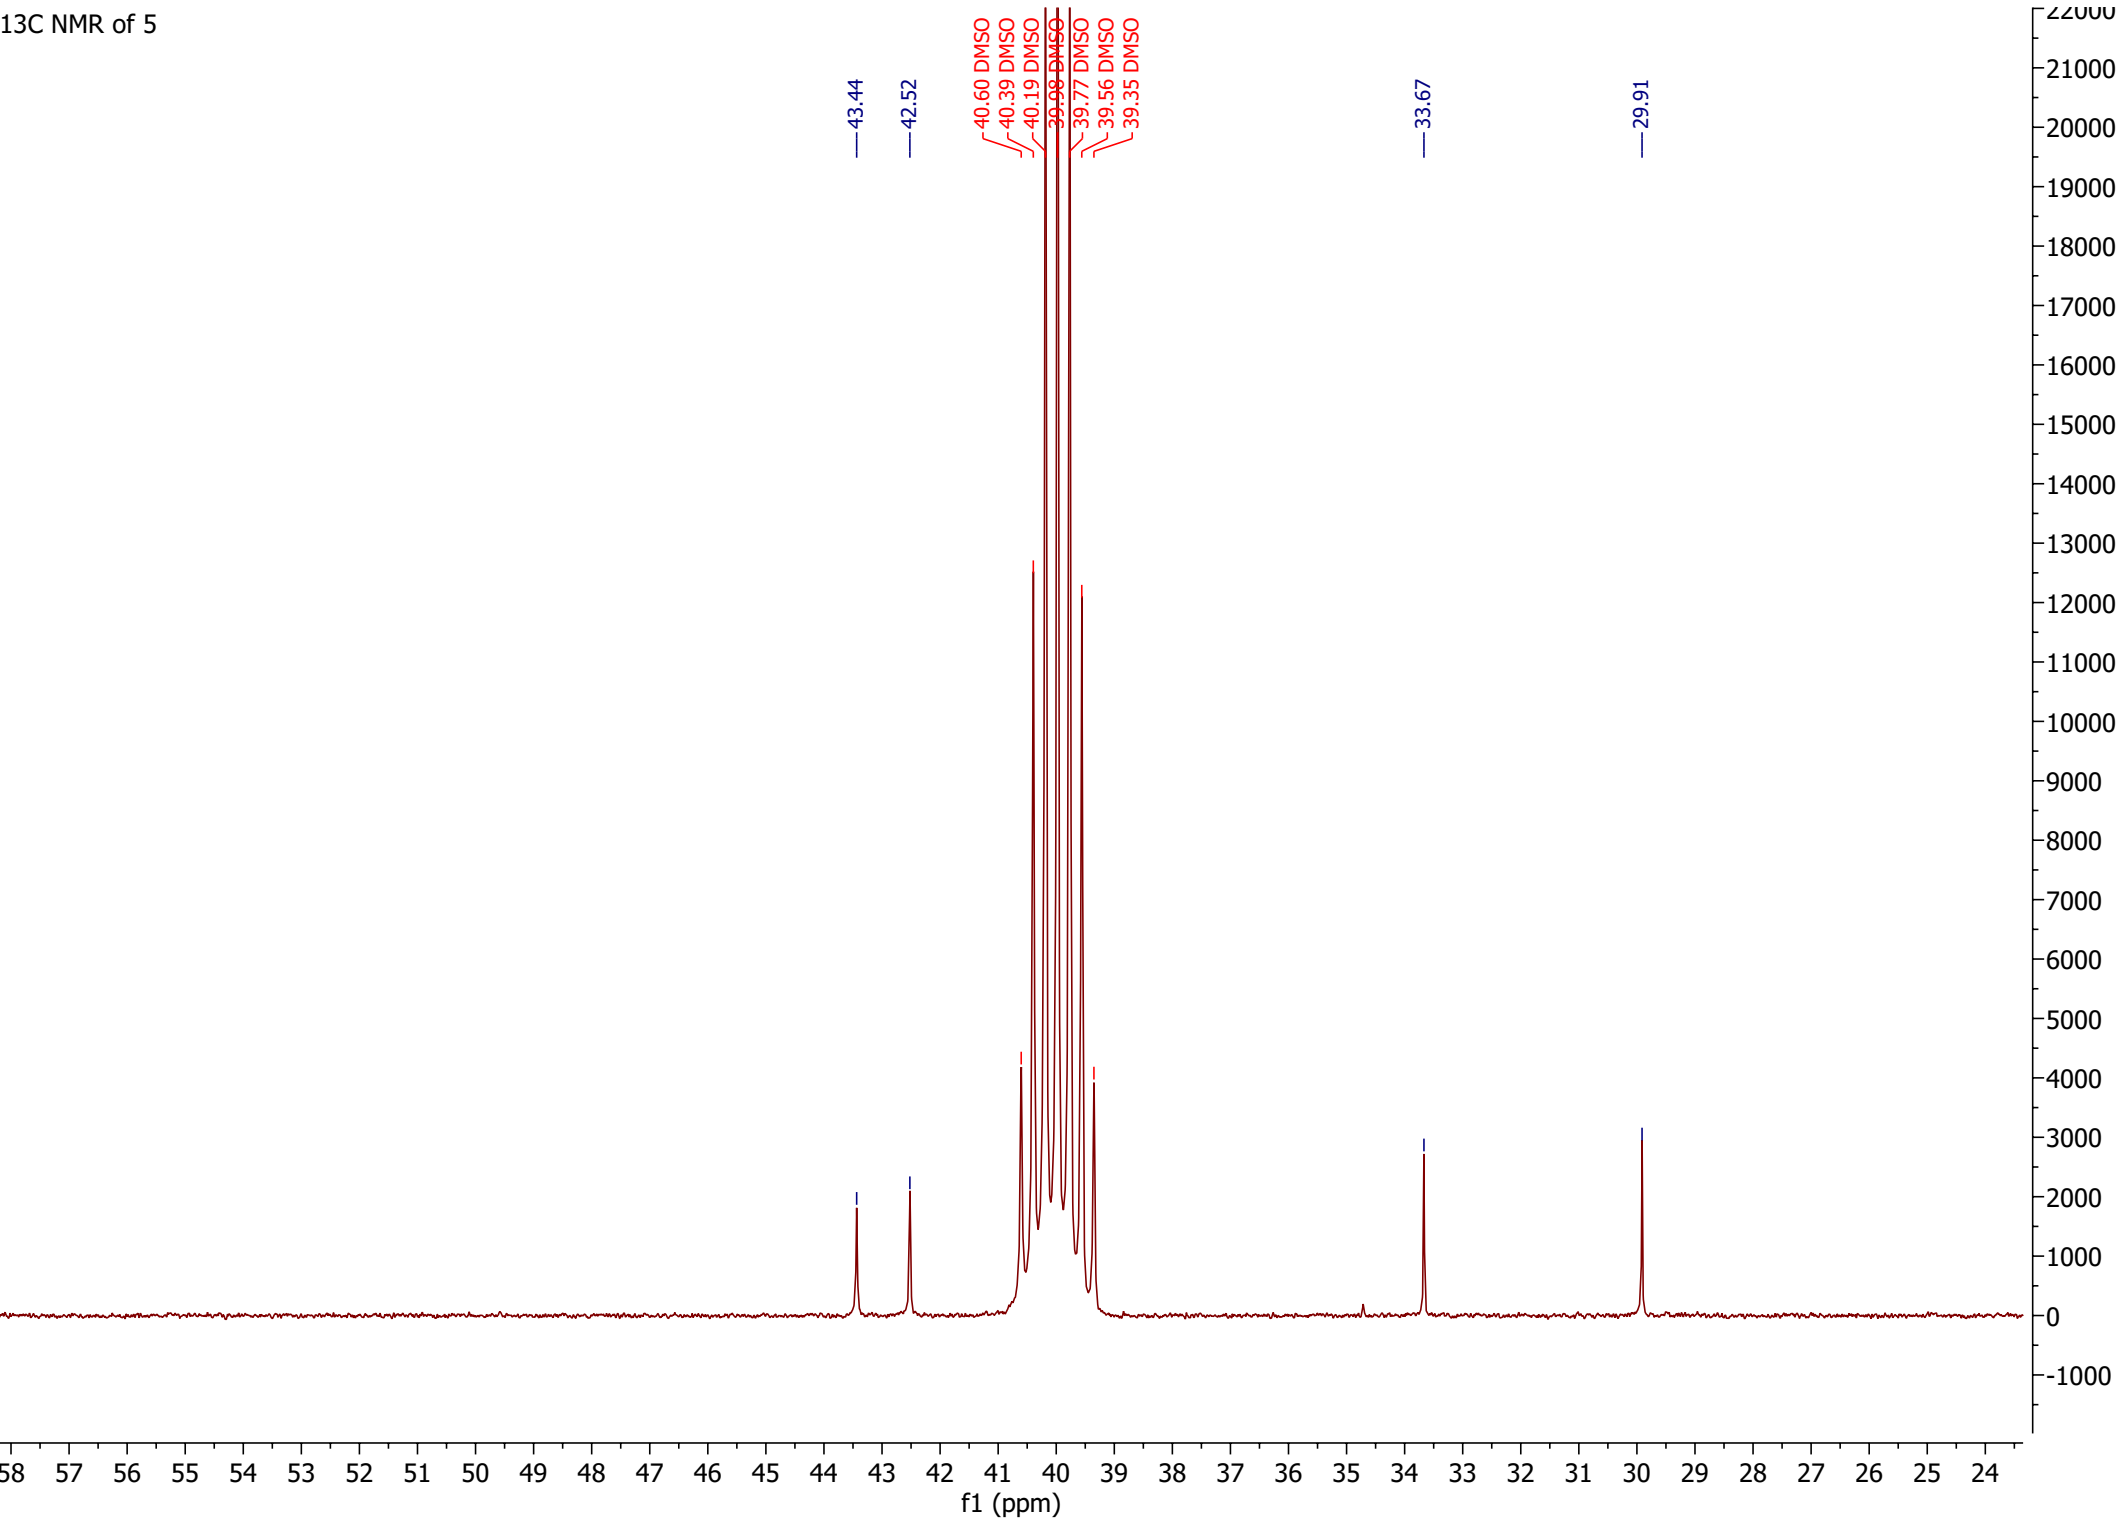

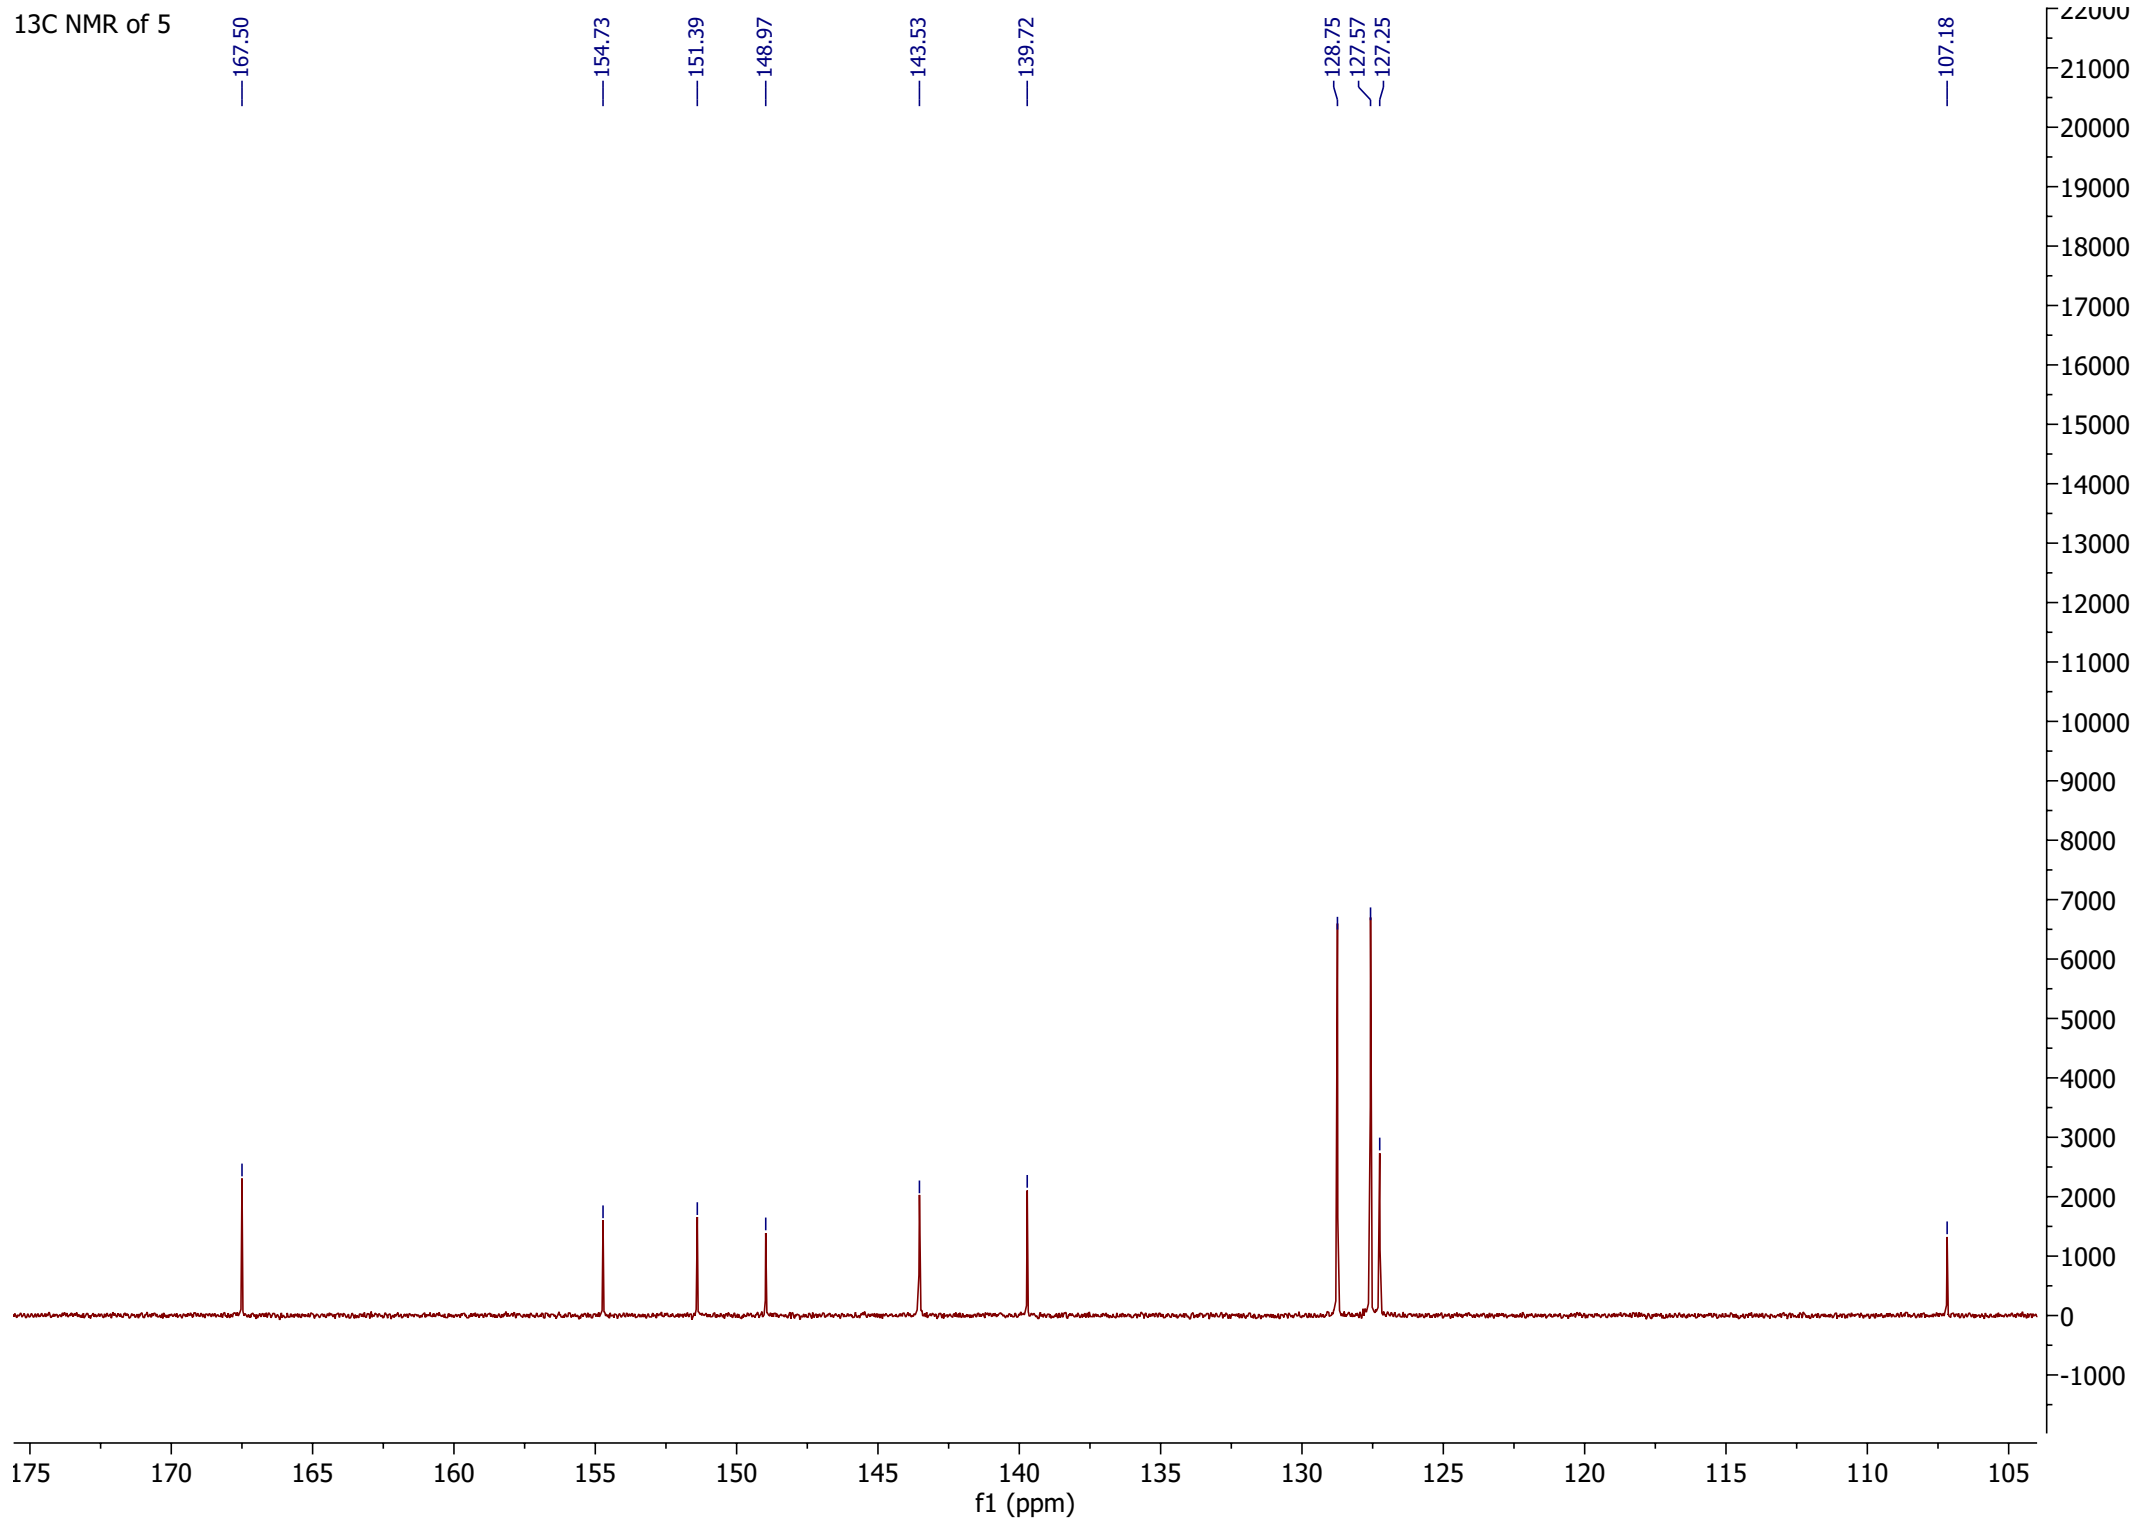

# Toxicity Report

## Compound 5

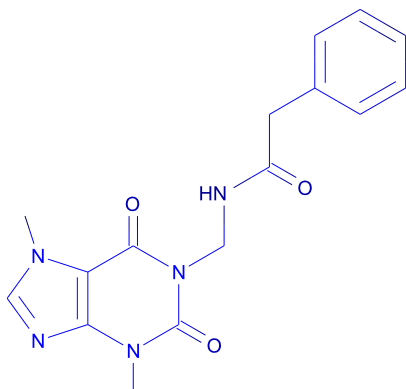

C<sub>16</sub>H<sub>17</sub>N<sub>5</sub>O<sub>3</sub>

Molecular Weight: 327.33788

ALogP: 0.773

Rotatable Bonds: 4

Acceptors: 4

Donors: 1

### Model Prediction

Prediction: Non-Mutagen

Probability: 0.173

Enrichment: 0.31

Bayesian Score: -14.9

Mahalanobis Distance: 12.1

Mahalanobis Distance p-value: 0.000525

Prediction: Positive if the Bayesian score is above the estimated best cutoff value from minimizing the false positive and false negative rate.

Probability: The estimated probability that the sample is in the positive category. This assumes that the Bayesian score follows a normal distribution and is different from the prediction using a cutoff.

Enrichment: An estimate of enrichment, that is, the increased likelihood (versus random) of this sample being in the category.

Bayesian Score: The standard Laplacian-modified Bayesian score.

Mahalanobis Distance: The Mahalanobis distance (MD) is the distance to the center of the training data. The larger the MD, the less trustworthy the prediction.

Mahalanobis Distance p-value: The p-value gives the fraction of training data with an MD greater than or equal to the one for the given sample, assuming normally distributed data. The smaller the p-value, the less trustworthy the prediction. For highly non-normal X properties (e.g., fingerprints), the MD p-value is wildly inaccurate.

## TOPKAT\_Ames\_Mutagenicity

### Structural Similar Compounds

| Name               | 112022-09-0                                      | FLUCONAZOLE  | Scopolamine .HBr .3H2O         |
|--------------------|--------------------------------------------------|--------------|--------------------------------|
| Structure          |                                                  |              |                                |
| Actual Endpoint    | Mutagen                                          | Non-Mutagen  | Non-Mutagen                    |
| Predicted Endpoint | Mutagen                                          | Non-Mutagen  | Non-Mutagen                    |
| Distance           | 0.535                                            | 0.554        | 0.556                          |
| Reference          | Kazius et. al., J. Med. Chem. (2005) 48, 312-320 | NDA # 19-949 | Environ. Mol. Mut. 19(21):1992 |

### Model Applicability

Unknown features are fingerprint features in the query molecule, but not found or appearing too infrequently in the training set.

1. All properties and OPS components are within expected ranges.

### Feature Contribution

#### Top features for positive contribution

| Fingerprint | Bit/Smiles | Feature Structure | Score | Mutagen in training set |
|-------------|------------|-------------------|-------|-------------------------|
| SCFP_12     | 136358998  | <br>[*]:n(:[*])C  | 0.455 | 142 out of 157          |

|                                        |            |                                                                                                                                             |       |                         |
|----------------------------------------|------------|---------------------------------------------------------------------------------------------------------------------------------------------|-------|-------------------------|
| SCFP_12                                | -587777653 | 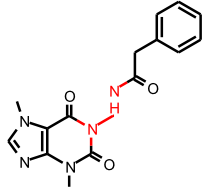<br>[*]NCN([*])[*]                                       | 0.42  | 4 out of 4              |
| SCFP_12                                | -443505090 | <br>[*][c]1:[*]:[*]:[cH]:<br>n:1C                        | 0.343 | 176 out of 218          |
| Top Features for negative contribution |            |                                                                                                                                             |       |                         |
| Fingerprint                            | Bit/Smiles | Feature Structure                                                                                                                           | Score | Mutagen in training set |
| SCFP_12                                | 1205795299 | <br>[*]N([*])[c]1:n:[*]:[*]:[c]:1[*]                     | -1.22 | 2 out of 16             |
| SCFP_12                                | 1445006032 | <br>[*]CN1C(=[*])([*])[c]2:[*]:[*]:n([*]):[c]:2<br>C1=O | -1.19 | 0 out of 4              |
| SCFP_12                                | 1731225349 | <br>[*]N1[*][c]2:[*]:[*]:n:[c]:2N(C)C1=O               | -1.19 | 0 out of 4              |

# Erlotinib

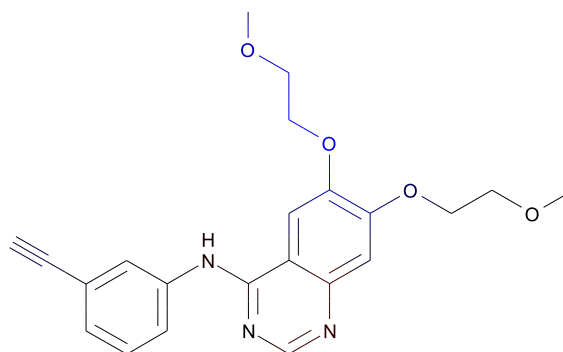

$C_{22}H_{23}N_3O_4$

Molecular Weight: 393.43572

ALogP: 4.309

Rotatable Bonds: 10

Acceptors: 7

Donors: 1

## Model Prediction

Prediction: Non-Mutagen

Probability: 0.6

Enrichment: 1.07

Bayesian Score: -5.04

Mahalanobis Distance: 14.6

Mahalanobis Distance p-value: 6.74e-011

Prediction: Positive if the Bayesian score is above the estimated best cutoff value from minimizing the false positive and false negative rate.

Probability: The estimated probability that the sample is in the positive category. This assumes that the Bayesian score follows a normal distribution and is different from the prediction using a cutoff.

Enrichment: An estimate of enrichment, that is, the increased likelihood (versus random) of this sample being in the category.

Bayesian Score: The standard Laplacian-modified Bayesian score.

Mahalanobis Distance: The Mahalanobis distance (MD) is the distance to the center of the training data. The larger the MD, the less trustworthy the prediction.

Mahalanobis Distance p-value: The p-value gives the fraction of training data with an MD greater than or equal to the one for the given sample, assuming normally distributed data. The smaller the p-value, the less trustworthy the prediction. For highly non-normal X properties (e.g., fingerprints), the MD p-value is wildly inaccurate.

# TOPKAT\_Ames\_Mutagenicity

## Structural Similar Compounds

| Name               | Carvedilol                                                                                                           | 99522-79-9                                       | HYCANTHONE FUROATE |
|--------------------|----------------------------------------------------------------------------------------------------------------------|--------------------------------------------------|--------------------|
| Structure          |                                                                                                                      |                                                  |                    |
| Actual Endpoint    | Non-Mutagen                                                                                                          | Non-Mutagen                                      | Mutagen            |
| Predicted Endpoint | Non-Mutagen                                                                                                          | Non-Mutagen                                      | Mutagen            |
| Distance           | 0.594                                                                                                                | 0.598                                            | 0.606              |
| Reference          | Contrera, J.F., Matthews, E.J., Kruhlak, N.L., and Benz, R.D., Regulatory Toxicology and Pharmacology 2005, 313-323. | Kazius et. al., J. Med. Chem. (2005) 48, 312-320 | EMIC               |

## Model Applicability

Unknown features are fingerprint features in the query molecule, but not found or appearing too infrequently in the training set.

1. All properties and OPS components are within expected ranges.

## Feature Contribution

| Top features for positive contribution |            |                   |       |                         |
|----------------------------------------|------------|-------------------|-------|-------------------------|
| Fingerprint                            | Bit/Smiles | Feature Structure | Score | Mutagen in training set |
| SCFP_12                                | 112346096  |                   | 0.36  | 1035 out of 1263        |



|                                        |             |                                                                                                                                        |        |                         |
|----------------------------------------|-------------|----------------------------------------------------------------------------------------------------------------------------------------|--------|-------------------------|
| SCFP_12                                | 10          | 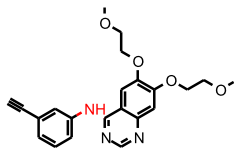<br><chem>[*]N[*]</chem>                            | 0.306  | 1774 out of 2287        |
| SCFP_12                                | -1380909229 | <br><chem>[*]N[c]1:[cH]:[*]:[cH]:[cH]:[cH]:1</chem> | 0.304  | 957 out of 1235         |
| Top Features for negative contribution |             |                                                                                                                                        |        |                         |
| Fingerprint                            | Bit/Smiles  | Feature Structure                                                                                                                      | Score  | Mutagen in training set |
| SCFP_12                                | -1099149596 | <br><chem>[*]OCCO[c](:[*]):[*]</chem>               | -1.12  | 1 out of 9              |
| SCFP_12                                | -677502852  | <br><chem>[*]C#C</chem>                           | -0.863 | 4 out of 19             |
| SCFP_12                                | -417738003  | <br><chem>[*]OCCOC</chem>                         | -0.782 | 12 out of 48            |

## Compound 5

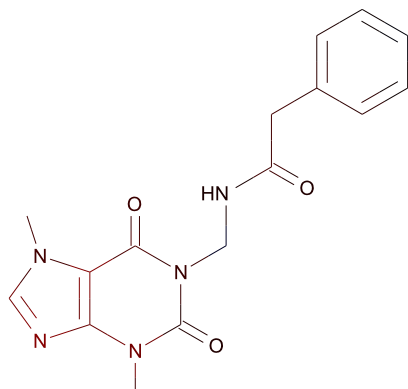

$C_{16}H_{17}N_5O_3$

Molecular Weight: 327.33788

ALogP: 0.773

Rotatable Bonds: 4

Acceptors: 4

Donors: 1

### Model Prediction

**Prediction: Toxic**

Probability: 0.639

Enrichment: 1.21

Bayesian Score: 2.35

Mahalanobis Distance: 8.22

Mahalanobis Distance p-value: 0.498

Prediction: Positive if the Bayesian score is above the estimated best cutoff value from minimizing the false positive and false negative rate.

Probability: The estimated probability that the sample is in the positive category. This assumes that the Bayesian score follows a normal distribution and is different from the prediction using a cutoff.

Enrichment: An estimate of enrichment, that is, the increased likelihood (versus random) of this sample being in the category.

Bayesian Score: The standard Laplacian-modified Bayesian score.

Mahalanobis Distance: The Mahalanobis distance (MD) is the distance to the center of the training data. The larger the MD, the less trustworthy the prediction.

Mahalanobis Distance p-value: The p-value gives the fraction of training data with an MD greater than or equal to the one for the given sample, assuming normally distributed data. The smaller the p-value, the less trustworthy the prediction. For highly non-normal X properties (e.g., fingerprints), the MD p-value is wildly inaccurate.

## TOPKAT\_Developmental\_Toxicity\_Potential

### Structural Similar Compounds

| Name               | Tiaramide .HCl (Free base form)         | Pirenzepine                     | N-(3-Piperidyl)3,4,5-trimethoxybenzamide |
|--------------------|-----------------------------------------|---------------------------------|------------------------------------------|
| Structure          |                                         |                                 |                                          |
| Actual Endpoint    | Toxic                                   | Non-Toxic                       | Toxic                                    |
| Predicted Endpoint | Toxic                                   | Non-Toxic                       | Toxic                                    |
| Distance           | 0.556                                   | 0.601                           | 0.622                                    |
| Reference          | Arzneimittelforschung 23(4):504-8; 1973 | Iyakuin Kenkyu 11:424-436; 1980 | Kiso to Rinsho 18:91-101; 1984           |

### Model Applicability

Unknown features are fingerprint features in the query molecule, but not found or appearing too infrequently in the training set.

1. All properties and OPS components are within expected ranges.

### Feature Contribution

#### Top features for positive contribution

| Fingerprint | Bit/Smiles | Feature Structure                             | Score | Toxic in training set |
|-------------|------------|-----------------------------------------------|-------|-----------------------|
| SCFP_6      | 1100167450 | <br>[*]C(=[*])C[c]1:[cH]:[cH]:[*]:[cH]:[cH]:1 | 0.441 | 3 out of 3            |

| SCFP_6                                 | -394704229  | 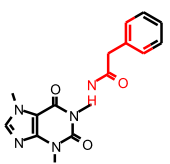<br><chem>[*]NC(=O)C(c)[*]1:[cH]:[*]<br/>[*]1:[cH]:[*]</chem> | 0.381  | 2 out of 2            |
|----------------------------------------|-------------|--------------------------------------------------------------------------------------------------------------------------------------------------|--------|-----------------------|
| SCFP_6                                 | 1394899299  | <br><chem>[*]NC(=O)C(c)1:[cH]:[cH]:[cH]:[cH]:1</chem>         | 0.381  | 2 out of 2            |
| Top Features for negative contribution |             |                                                                                                                                                  |        |                       |
| Fingerprint                            | Bit/Smiles  | Feature Structure                                                                                                                                | Score  | Toxic in training set |
| SCFP_6                                 | 136358998   | <br><chem>[*]:n(:[*])C</chem>                                 | -0.55  | 2 out of 8            |
| SCFP_6                                 | 399659969   | <br><chem>[*]CN(C(=[*])[*])C(=[*])[*])</chem>                | -0.526 | 3 out of 11           |
| SCFP_6                                 | -1379591900 | <br><chem>[*][c]1:[*]:[cH]:[cH]:[cH]:[cH]:1</chem>          | -0.282 | 33 out of 84          |

# Erlotinib

# TOPKAT\_Developmental\_Toxicity\_Potential

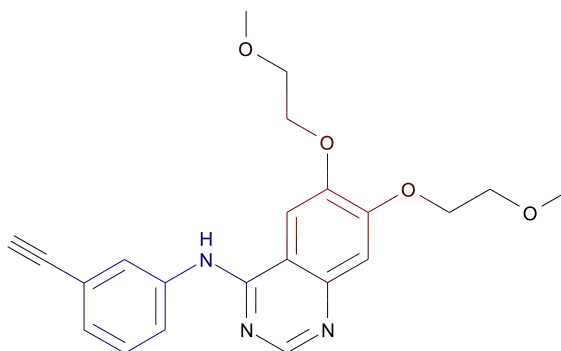

C<sub>22</sub>H<sub>23</sub>N<sub>3</sub>O<sub>4</sub>

Molecular Weight: 393.43572

ALogP: 4.309

Rotatable Bonds: 10

Acceptors: 7

Donors: 1

## Model Prediction

Prediction: Non-Toxic

Probability: 0.504

Enrichment: 0.959

Bayesian Score: -1.17

Mahalanobis Distance: 8.76

Mahalanobis Distance p-value: 0.258

Prediction: Positive if the Bayesian score is above the estimated best cutoff value from minimizing the false positive and false negative rate.

Probability: The estimated probability that the sample is in the positive category. This assumes that the Bayesian score follows a normal distribution and is different from the prediction using a cutoff.

Enrichment: An estimate of enrichment, that is, the increased likelihood (versus random) of this sample being in the category. Bayesian Score: The standard Laplacian-modified Bayesian score.

Mahalanobis Distance: The Mahalanobis distance (MD) is the distance to the center of the training data. The larger the MD, the less trustworthy the prediction.

Mahalanobis Distance p-value: The p-value gives the fraction of training data with an MD greater than or equal to the one for the given sample, assuming normally distributed data. The smaller the p-value, the less trustworthy the prediction. For highly non-normal X properties (e.g., fingerprints), the MD p-value is wildly inaccurate.

## Structural Similar Compounds

| Name               | Nicardipine                       | Suxibuzone                  | Etofenamate                         |
|--------------------|-----------------------------------|-----------------------------|-------------------------------------|
| Structure          |                                   |                             |                                     |
| Actual Endpoint    | Non-Toxic                         | Toxic                       | Non-Toxic                           |
| Predicted Endpoint | Non-Toxic                         | Toxic                       | Non-Toxic                           |
| Distance           | 0.608                             | 0.620                       | 0.635                               |
| Reference          | Kiso to Rinsho 13:1149-1159; 1979 | Oyo Yakuri 20:377-386; 1980 | Iyakuhin Kenkyu 13(4):896-909; 1982 |

## Model Applicability

Unknown features are fingerprint features in the query molecule, but not found or appearing too infrequently in the training set.

1. All properties and OPS components are within expected ranges.

## Feature Contribution

### Top features for positive contribution

| Fingerprint | Bit/Smiles | Feature Structure                                    | Score | Toxic in training set |
|-------------|------------|------------------------------------------------------|-------|-----------------------|
| SCFP_6      | 123285475  | <br>[*]O[c]1:[cH]:[c](:n:[*]):[c](:[*]):[*]:[c]:1[*] | 0.478 | 4 out of 4            |

|                                        |             |                                                                                                                                                     |        |                       |
|----------------------------------------|-------------|-----------------------------------------------------------------------------------------------------------------------------------------------------|--------|-----------------------|
| SCFP_6                                 | -1814968949 | 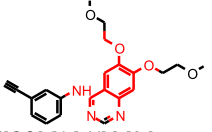<br>[*]CO[c]1:[cH]:[c]2:[c](N[*]):n:[*]:n:[c]:2:[cH]:[c]:1O[*]   | 0.381  | 2 out of 2            |
| SCFP_6                                 | 446954673   | <br>[*]CO[c]1:[cH]:[c]2:n:[cH]:[*]:[c]([*]):[c]:2:[cH]:[c]:1O[*] | 0.381  | 2 out of 2            |
| Top Features for negative contribution |             |                                                                                                                                                     |        |                       |
| Fingerprint                            | Bit/Smiles  | Feature Structure                                                                                                                                   | Score  | Toxic in training set |
| SCFP_6                                 | 2142015375  | <br>[*]:[cH]:[c]1:n:[cH]:n:[*]:[c]:1[*]                          | -0.718 | 0 out of 2            |
| SCFP_6                                 | -2020651081 | <br>[*][c]1:[cH]:[cH]:[cH]:[cH]:[c](N[c](:[*]):[*]):[cH]:1      | -0.718 | 0 out of 2            |
| SCFP_6                                 | -300914917  | <br>[*][c]1:[*]:[cH]:[cH]:[c](N[c](:[*]):[*]):[cH]:1           | -0.718 | 0 out of 2            |

## Compound 5

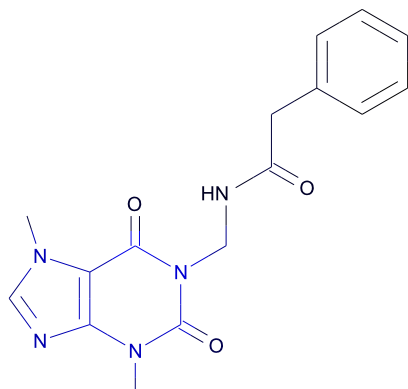

$C_{16}H_{17}N_5O_3$

Molecular Weight: 327.33788

ALogP: 0.773

Rotatable Bonds: 4

Acceptors: 4

Donors: 1

### Model Prediction

Prediction: Non-Carcinogen

Probability: 0.211

Enrichment: 0.657

Bayesian Score: -8.39

Mahalanobis Distance: 12.5

Mahalanobis Distance p-value: 0.00234

Prediction: Positive if the Bayesian score is above the estimated best cutoff value from minimizing the false positive and false negative rate.

Probability: The estimated probability that the sample is in the positive category. This assumes that the Bayesian score follows a normal distribution and is different from the prediction using a cutoff.

Enrichment: An estimate of enrichment, that is, the increased likelihood (versus random) of this sample being in the category.

Bayesian Score: The standard Laplacian-modified Bayesian score.

Mahalanobis Distance: The Mahalanobis distance (MD) is the distance to the center of the training data. The larger the MD, the less trustworthy the prediction.

Mahalanobis Distance p-value: The p-value gives the fraction of training data with an MD greater than or equal to the one for the given sample, assuming normally distributed data. The smaller the p-value, the less trustworthy the prediction. For highly non-normal X properties (e.g., fingerprints), the MD p-value is wildly inaccurate.

## TOPKAT\_Mouse\_Female\_FDA\_None\_vs\_Carcinogen

### Structural Similar Compounds

| Name               | Pentoxifylline                                                      | Scopolamine                                                         | Fluconazole                                                         |
|--------------------|---------------------------------------------------------------------|---------------------------------------------------------------------|---------------------------------------------------------------------|
| Structure          |                                                                     |                                                                     |                                                                     |
| Actual Endpoint    | Non-Carcinogen                                                      | Non-Carcinogen                                                      | Non-Carcinogen                                                      |
| Predicted Endpoint | Non-Carcinogen                                                      | Non-Carcinogen                                                      | Non-Carcinogen                                                      |
| Distance           | 0.458                                                               | 0.557                                                               | 0.576                                                               |
| Reference          | US FDA (Centre for Drug Eval.& Res./Off. Testing & Res.) Sept. 1997 | US FDA (Centre for Drug Eval.& Res./Off. Testing & Res.) Sept. 1997 | US FDA (Centre for Drug Eval.& Res./Off. Testing & Res.) Sept. 1997 |

### Model Applicability

Unknown features are fingerprint features in the query molecule, but not found or appearing too infrequently in the training set.

1. All properties and OPS components are within expected ranges.
2. Unknown ECFP\_2 feature: -39630146: [\*]NCN([\*])[\*]

### Feature Contribution

#### Top features for positive contribution

| Fingerprint | Bit/Smiles | Feature Structure                 | Score | Carcinogen in training set |
|-------------|------------|-----------------------------------|-------|----------------------------|
| ECFP_6      | -407983022 | <br>[*][c]1:[*]:[*]:[cH]:<br>n:1C | 0.442 | 2 out of 3                 |

| ECFP_6                                 | 2106656448  | 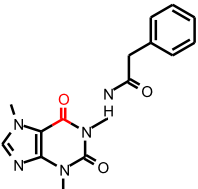<br><chem>[*]C(=O)[*]</chem>                            | 0.254  | 31 out of 77               |
|----------------------------------------|-------------|--------------------------------------------------------------------------------------------------------------------------------------------|--------|----------------------------|
| ECFP_6                                 | 777558239   | <br><chem>[*][c]1:n:[cH]:n(C):[c]:1[*]</chem>           | 0.212  | 1 out of 2                 |
| Top Features for negative contribution |             |                                                                                                                                            |        |                            |
| Fingerprint                            | Bit/Smiles  | Feature Structure                                                                                                                          | Score  | Carcinogen in training set |
| ECFP_6                                 | -661097313  | <br><chem>[*]CN(C(=[*])[*])C(=[*])[*]</chem>            | -1.55  | 0 out of 12                |
| ECFP_6                                 | 1731843802  | <br><chem>[*]CC(=O)N[*]</chem>                         | -0.657 | 0 out of 3                 |
| ECFP_6                                 | -1677427181 | <br><chem>[*]N1[*][c]2:[*]:[*]:n:[c]:2N(C)C1=O</chem> | -0.482 | 0 out of 2                 |

# Erlotinib

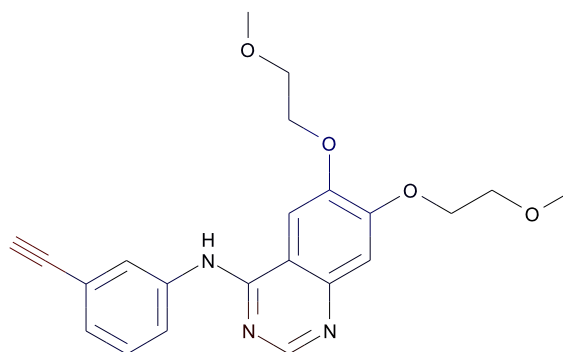

$C_{22}H_{23}N_3O_4$

Molecular Weight: 393.43572

ALogP: 4.309

Rotatable Bonds: 10

Acceptors: 7

Donors: 1

## Model Prediction

Prediction: Non-Carcinogen

Probability: 0.235

Enrichment: 0.733

Bayesian Score: -1.68

Mahalanobis Distance: 15.3

Mahalanobis Distance p-value: 7.99e-008

Prediction: Positive if the Bayesian score is above the estimated best cutoff value from minimizing the false positive and false negative rate.

Probability: The estimated probability that the sample is in the positive category. This assumes that the Bayesian score follows a normal distribution and is different from the prediction using a cutoff.

Enrichment: An estimate of enrichment, that is, the increased likelihood (versus random) of this sample being in the category.

Bayesian Score: The standard Laplacian-modified Bayesian score.

Mahalanobis Distance: The Mahalanobis distance (MD) is the distance to the center of the training data. The larger the MD, the less trustworthy the prediction.

# TOPKAT\_Mouse\_Female\_FDA\_None\_vs\_Carcinogen

## Structural Similar Compounds

| Name               | Mycophenolate                                                       | Nicardipine                                                         | Nimodipine                                                          |
|--------------------|---------------------------------------------------------------------|---------------------------------------------------------------------|---------------------------------------------------------------------|
| Structure          |                                                                     |                                                                     |                                                                     |
| Actual Endpoint    | Non-Carcinogen                                                      | Non-Carcinogen                                                      | Non-Carcinogen                                                      |
| Predicted Endpoint | Non-Carcinogen                                                      | Non-Carcinogen                                                      | Non-Carcinogen                                                      |
| Distance           | 0.632                                                               | 0.664                                                               | 0.675                                                               |
| Reference          | US FDA (Centre for Drug Eval.& Res./Off. Testing & Res.) Sept. 1997 | US FDA (Centre for Drug Eval.& Res./Off. Testing & Res.) Sept. 1997 | US FDA (Centre for Drug Eval.& Res./Off. Testing & Res.) Sept. 1997 |

## Model Applicability

Unknown features are fingerprint features in the query molecule, but not found or appearing too infrequently in the training set.

1. All properties and OPS components are within expected ranges.
2. Unknown ECFP\_2 feature: -182178874: [\*]#C[c](:c:[\*]):c:[\*]
3. Unknown ECFP\_2 feature: 1139738044: [\*]:[c](:[\*])C#C

## Feature Contribution

### Top features for positive contribution

| Fingerprint | Bit/Smiles  | Feature Structure | Score | Carcinogen in training set |
|-------------|-------------|-------------------|-------|----------------------------|
| ECFP_6      | -1939823063 | <br>[*]#C         | 0.866 | 8 out of 9                 |



| ECFP_6                                 | -1545539812 | 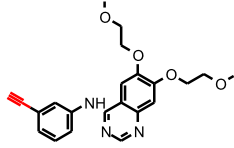<br>[*]C#C                                                   | 0.866  | 8 out of 9                 |
|----------------------------------------|-------------|-------------------------------------------------------------------------------------------------------------------------------------------------|--------|----------------------------|
| ECFP_6                                 | -1114776580 | <br>[*]C#[*]                                                 | 0.755  | 11 out of 15               |
| Top Features for negative contribution |             |                                                                                                                                                 |        |                            |
| Fingerprint                            | Bit/Smiles  | Feature Structure                                                                                                                               | Score  | Carcinogen in training set |
| ECFP_6                                 | 2007300961  | <br>[*][c]1:[*]:[c]([*]):<br>[cH]:[cH]:[cH]:1                | -0.652 | 5 out of 34                |
| ECFP_6                                 | -2063202154 | <br>[*]O[c]1:[cH]:[c](:n:<br>[*]):[c]([*]):[*]:[<br>c]:1[*] | -0.482 | 0 out of 2                 |
| ECFP_6                                 | -1242906247 | <br>[*]:[c]([*])N[c]([*]<br>):[*]                          | -0.482 | 0 out of 2                 |

## Compound 5

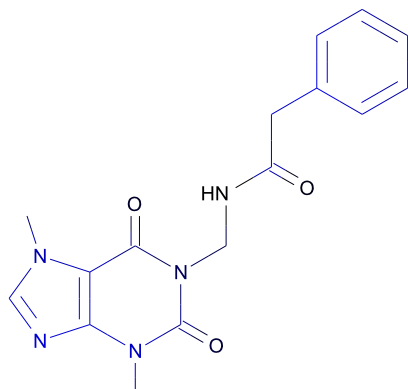

C<sub>16</sub>H<sub>17</sub>N<sub>5</sub>O<sub>3</sub>

Molecular Weight: 327.33788

ALogP: 0.773

Rotatable Bonds: 4

Acceptors: 4

Donors: 1

### Model Prediction

Prediction: Non-Carcinogen

Probability: 0.135

Enrichment: 0.459

Bayesian Score: -10.7

Mahalanobis Distance: 11.8

Mahalanobis Distance p-value: 0.0103

Prediction: Positive if the Bayesian score is above the estimated best cutoff value from minimizing the false positive and false negative rate.

Probability: The estimated probability that the sample is in the positive category. This assumes that the Bayesian score follows a normal distribution and is different from the prediction using a cutoff.

Enrichment: An estimate of enrichment, that is, the increased likelihood (versus random) of this sample being in the category.

Bayesian Score: The standard Laplacian-modified Bayesian score.

Mahalanobis Distance: The Mahalanobis distance (MD) is the distance to the center of the training data. The larger the MD, the less trustworthy the prediction.

Mahalanobis Distance p-value: The p-value gives the fraction of training data with an MD greater than or equal to the one for the given sample, assuming normally distributed data. The smaller the p-value, the less trustworthy the prediction. For highly non-normal X properties (e.g., fingerprints), the MD p-value is wildly inaccurate.

## TOPKAT\_Mouse\_Male\_FDA\_None\_vs\_Carcinogen

### Structural Similar Compounds

| Name               | Pentoxifylline                                                      | Fluconazole                                                         | Scopolamine                                                         |
|--------------------|---------------------------------------------------------------------|---------------------------------------------------------------------|---------------------------------------------------------------------|
| Structure          |                                                                     |                                                                     |                                                                     |
| Actual Endpoint    | Non-Carcinogen                                                      | Non-Carcinogen                                                      | Non-Carcinogen                                                      |
| Predicted Endpoint | Non-Carcinogen                                                      | Non-Carcinogen                                                      | Non-Carcinogen                                                      |
| Distance           | 0.472                                                               | 0.559                                                               | 0.561                                                               |
| Reference          | US FDA (Centre for Drug Eval.& Res./Off. Testing & Res.) Sept. 1997 | US FDA (Centre for Drug Eval.& Res./Off. Testing & Res.) Sept. 1997 | US FDA (Centre for Drug Eval.& Res./Off. Testing & Res.) Sept. 1997 |

### Model Applicability

Unknown features are fingerprint features in the query molecule, but not found or appearing too infrequently in the training set.

1. All properties and OPS components are within expected ranges.

### Feature Contribution

#### Top features for positive contribution

| Fingerprint | Bit/Smiles | Feature Structure  | Score | Carcinogen in training set |
|-------------|------------|--------------------|-------|----------------------------|
| FCFP_6      | 470101049  | <br>[*]NCN([*])[*] | 0.46  | 1 out of 1                 |

| FCFP_6                                 | 566058135   | 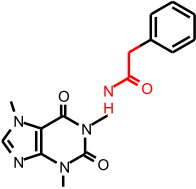<br><chem>[*]CC(=O)N[*]</chem>                          | 0.447  | 17 out of 40               |
|----------------------------------------|-------------|--------------------------------------------------------------------------------------------------------------------------------------------|--------|----------------------------|
| FCFP_6                                 | -1539132615 | <br><chem>[*]n1:[*]:[*]:[c]([*]):[c]:1C(=[*])[*]</chem> | 0.328  | 19 out of 51               |
| Top Features for negative contribution |             |                                                                                                                                            |        |                            |
| Fingerprint                            | Bit/Smiles  | Feature Structure                                                                                                                          | Score  | Carcinogen in training set |
| FCFP_6                                 | 1981711554  | <br><chem>[*]C(=[*])C[c]1:[cH]:[cH]:[cH]:[cH]:1</chem>  | -1.42  | 0 out of 12                |
| FCFP_6                                 | -497728148  | <br><chem>[*]C(=[*])C[c]1:[cH]:[cH]:[*]:[cH]:1</chem>  | -0.96  | 2 out of 26                |
| FCFP_6                                 | -124685461  | <br><chem>[*]n1:[*]:[*]:n:[cH]:1</chem>               | -0.731 | 1 out of 12                |

# Erlotinib

# TOPKAT\_Mouse\_Male\_FDA\_None\_vs\_Carcinogen

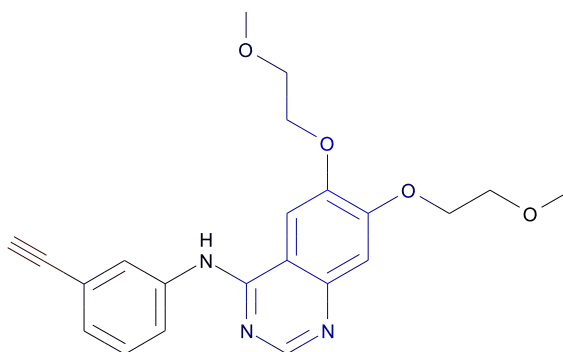

$C_{22}H_{23}N_3O_4$

Molecular Weight: 393.43572

ALogP: 4.309

Rotatable Bonds: 10

Acceptors: 7

Donors: 1

## Model Prediction

Prediction: Non-Carcinogen

Probability: 0.181

Enrichment: 0.614

Bayesian Score: -6.29

Mahalanobis Distance: 16

Mahalanobis Distance p-value: 1.07e-009

Prediction: Positive if the Bayesian score is above the estimated best cutoff value from minimizing the false positive and false negative rate.

Probability: The estimated probability that the sample is in the positive category. This assumes that the Bayesian score follows a normal distribution and is different from the prediction using a cutoff.

Enrichment: An estimate of enrichment, that is, the increased likelihood (versus random) of this sample being in the category.

Bayesian Score: The standard Laplacian-modified Bayesian score.

Mahalanobis Distance: The Mahalanobis distance (MD) is the distance to the center of the training data. The larger the MD, the less trustworthy the prediction.

Mahalanobis Distance p-value: The p-value gives the fraction of training data with an MD greater than or equal to the one for the given sample, assuming normally distributed data. The smaller the p-value, the less trustworthy the prediction. For highly non-normal X properties (e.g., fingerprints), the MD p-value is wildly inaccurate.

## Structural Similar Compounds

| Name               | Mycophenolate                                                       | Nicardipine                                                         | Nimodipine                                                          |
|--------------------|---------------------------------------------------------------------|---------------------------------------------------------------------|---------------------------------------------------------------------|
| Structure          |                                                                     |                                                                     |                                                                     |
| Actual Endpoint    | Non-Carcinogen                                                      | Non-Carcinogen                                                      | Non-Carcinogen                                                      |
| Predicted Endpoint | Non-Carcinogen                                                      | Non-Carcinogen                                                      | Non-Carcinogen                                                      |
| Distance           | 0.615                                                               | 0.655                                                               | 0.668                                                               |
| Reference          | US FDA (Centre for Drug Eval.& Res./Off. Testing & Res.) Sept. 1997 | US FDA (Centre for Drug Eval.& Res./Off. Testing & Res.) Sept. 1997 | US FDA (Centre for Drug Eval.& Res./Off. Testing & Res.) Sept. 1997 |

## Model Applicability

Unknown features are fingerprint features in the query molecule, but not found or appearing too infrequently in the training set.

1. All properties and OPS components are within expected ranges.
2. Unknown FCFP\_2 feature: 902193919: [\*]:[c](:[\*])C#C

## Feature Contribution

### Top features for positive contribution

| Fingerprint | Bit/Smiles | Feature Structure | Score | Carcinogen in training set |
|-------------|------------|-------------------|-------|----------------------------|
| FCFP_6      | 131784192  |                   | 0.983 | 8 out of 9                 |

|                                        |            |                                                                                                                                                    |        |                            |
|----------------------------------------|------------|----------------------------------------------------------------------------------------------------------------------------------------------------|--------|----------------------------|
| FCFP_6                                 | -773983804 | 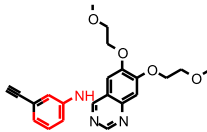<br>[*]N[c]1:[cH]:[*]:[cH]:[cH]:[cH]:1                          | 0.409  | 10 out of 24               |
| FCFP_6                                 | -771557733 | <br>[*]N[c]1:[cH]:[*]:[cH]:[c]:([cH]:1)C#[*]                    | 0.38   | 2 out of 4                 |
| Top Features for negative contribution |            |                                                                                                                                                    |        |                            |
| Fingerprint                            | Bit/Smiles | Feature Structure                                                                                                                                  | Score  | Carcinogen in training set |
| FCFP_6                                 | -124685461 | <br>[*]n1:[*]:[*]:n:[cH]:1                                      | -0.731 | 1 out of 12                |
| FCFP_6                                 | 1674955425 | <br>[*]O[c]1:[cH]:[c]:([c]([c]([*]):[*]):[c]:[*]):[*]:[c]:1[*] | -0.719 | 0 out of 4                 |
| FCFP_6                                 | 1293778554 | <br>[*]:[c]:([*])N[c]([*]):[*]                                | -0.719 | 0 out of 4                 |

## Compound 5

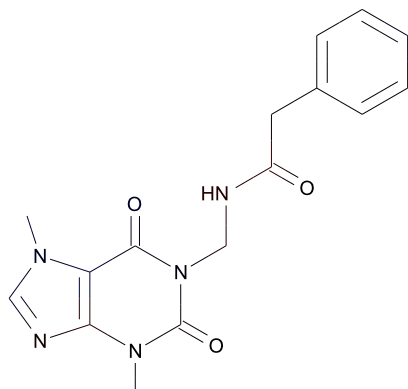

$C_{16}H_{17}N_5O_3$

Molecular Weight: 327.33788

ALogP: 0.773

Rotatable Bonds: 4

Acceptors: 4

Donors: 1

### Model Prediction

Prediction: Mild

Probability: 0.811

Enrichment: 1.18

Bayesian Score: -0.533

Mahalanobis Distance: 10.6

Mahalanobis Distance p-value: 0.018

Prediction: Positive if the Bayesian score is above the estimated best cutoff value from minimizing the false positive and false negative rate.

Probability: The estimated probability that the sample is in the positive category. This assumes that the Bayesian score follows a normal distribution and is different from the prediction using a cutoff.

Enrichment: An estimate of enrichment, that is, the increased likelihood (versus random) of this sample being in the category.

Bayesian Score: The standard Laplacian-modified Bayesian score.

Mahalanobis Distance: The Mahalanobis distance (MD) is the distance to the center of the training data. The larger the MD, the less trustworthy the prediction.

Mahalanobis Distance p-value: The p-value gives the fraction of training data with an MD greater than or equal to the one for the given sample, assuming normally distributed data. The smaller the p-value, the less trustworthy the prediction. For highly non-normal X properties (e.g., fingerprints), the MD p-value is wildly inaccurate.

## TOPKAT\_Ocular\_Irritancy\_Mild\_vs\_Moderate\_Severe

### Structural Similar Compounds

| Name               | 2,5-DICHLORO-4(3'-METHYL-5' PYRAZOLON-1'-YL)BENZENE SULFONIC ACID | 0-ANISIDINE;ACETOACETYL | 3(2H)-Pyridazinone; 5-amino-4-chloro-2-phenyl-                         |
|--------------------|-------------------------------------------------------------------|-------------------------|------------------------------------------------------------------------|
| Structure          |                                                                   |                         |                                                                        |
| Actual Endpoint    | Mild                                                              | Mild                    | Mild                                                                   |
| Predicted Endpoint | Mild                                                              | Mild                    | Mild                                                                   |
| Distance           | 0.665                                                             | 0.683                   | 0.686                                                                  |
| Reference          | 28ZPAK-;186;72                                                    | 28ZPAK-;116;72          | Prehled Prumyslove Toxikologie; Organické Latky; Marhold; J. pp 868;86 |

### Model Applicability

Unknown features are fingerprint features in the query molecule, but not found or appearing too infrequently in the training set.

1. All properties and OPS components are within expected ranges.
2. Unknown FCFP\_2 feature: -124685461: [\*]n1:[\*]:[\*]:n:[cH]:1
3. Unknown FCFP\_2 feature: 136150461: [\*]:n(:[\*])C

### Feature Contribution

#### Top features for positive contribution

| Fingerprint | Bit/Smiles | Feature Structure | Score | Moderate_Severe in training set |
|-------------|------------|-------------------|-------|---------------------------------|
|-------------|------------|-------------------|-------|---------------------------------|

| FCFP_10                                | -497728148  | 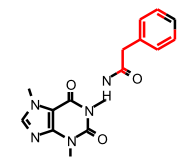<br>[*]C(=[*])C[c]1:[cH]:[cH]:[*]:[cH]:[cH]:1 | 0.356  | 24 out of 25                    |
|----------------------------------------|-------------|----------------------------------------------------------------------------------------------------------------------------------|--------|---------------------------------|
| FCFP_10                                | -1410049896 | <br>[*]N([*])[c]1:n:[*]:[*]:[c]:1[*]          | 0.256  | 2 out of 2                      |
| FCFP_10                                | 470101049   | <br>[*]NCN([*])[*]                            | 0.256  | 2 out of 2                      |
| Top Features for negative contribution |             |                                                                                                                                  |        |                                 |
| Fingerprint                            | Bit/Smiles  | Feature Structure                                                                                                                | Score  | Moderate_Severe in training set |
| FCFP_10                                | -306856457  | <br>[*][c]1:[*]:[*]:[cH]:n:1C                | -0.842 | 0 out of 2                      |
| FCFP_10                                | -1549163031 | <br>[*]N([*])C(=O)[c]([*]):[*]              | -0.657 | 5 out of 16                     |

|         |           |                                                                                                                                                                                                                                                                                                                                                                                        |        |              |
|---------|-----------|----------------------------------------------------------------------------------------------------------------------------------------------------------------------------------------------------------------------------------------------------------------------------------------------------------------------------------------------------------------------------------------|--------|--------------|
| FCFP_10 | 136627117 | 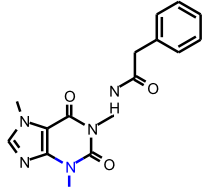 <p>Chemical structure of 1-((benzyloxy)amino)-2-methyl-1H-imidazole-3-carboxamide. The structure features an imidazole ring with a methyl group at position 2, a carboxamide group at position 3, and a benzyloxy group at position 1. The nitrogen atom at position 1 is highlighted in blue.</p> | -0.316 | 46 out of 96 |
|---------|-----------|----------------------------------------------------------------------------------------------------------------------------------------------------------------------------------------------------------------------------------------------------------------------------------------------------------------------------------------------------------------------------------------|--------|--------------|

[\*]N([\*])C



# Erlotinib

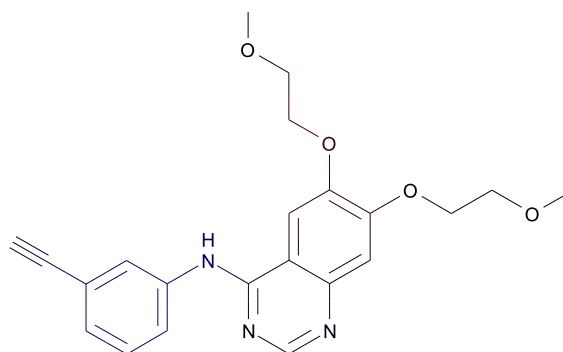

$C_{22}H_{23}N_3O_4$

Molecular Weight: 393.43572

ALogP: 4.309

Rotatable Bonds: 10

Acceptors: 7

Donors: 1

## Model Prediction

Prediction: Mild

Probability: 0.766

Enrichment: 1.11

Bayesian Score: -2.1

Mahalanobis Distance: 10.4

Mahalanobis Distance p-value: 0.0368

Prediction: Positive if the Bayesian score is above the estimated best cutoff value from minimizing the false positive and false negative rate.

Probability: The estimated probability that the sample is in the positive category. This assumes that the Bayesian score follows a normal distribution and is different from the prediction using a cutoff.

Enrichment: An estimate of enrichment, that is, the increased likelihood (versus random) of this sample being in the category.

Bayesian Score: The standard Laplacian-modified Bayesian score.

Mahalanobis Distance: The Mahalanobis distance (MD) is the distance to the center of the training data. The larger the MD, the less trustworthy the prediction.

# TOPKAT\_Ocular\_Irritancy\_Mild\_vs\_Moderate\_Severe

## Structural Similar Compounds

| Name               | Benzoic acid; p-(N-butyl-2-(butylamino)acetamido)-; butyl ester; | COLCHICINE       | Benzoic acid; p-(N-butyl-2-(piperidino)acetamido)-; butyl ester; |
|--------------------|------------------------------------------------------------------|------------------|------------------------------------------------------------------|
| Structure          |                                                                  |                  |                                                                  |
| Actual Endpoint    | Moderate_Severe                                                  | Moderate_Severe  | Moderate_Severe                                                  |
| Predicted Endpoint | Moderate_Severe                                                  | Moderate_Severe  | Moderate_Severe                                                  |
| Distance           | 0.648                                                            | 0.707            | 0.750                                                            |
| Reference          | Arzneimittel-Forschung 8;609;58                                  | AJOPAA 31;837;48 | Arzneimittel-Forschung 8;609;58                                  |

## Model Applicability

Unknown features are fingerprint features in the query molecule, but not found or appearing too infrequently in the training set.

1. All properties and OPS components are within expected ranges.
2. Unknown FCFP\_2 feature: -1151884458: [\*]N[c](:n[\*]):[c](:[\*]):[\*]
3. Unknown FCFP\_2 feature: -124685461: [\*]n1:[\*]:[\*]:n:[cH]:1
4. Unknown FCFP\_2 feature: 902193919: [\*]:[c](:[\*])C#C

## Feature Contribution

| Top features for positive contribution |            |                                       |       |                                 |
|----------------------------------------|------------|---------------------------------------|-------|---------------------------------|
| Fingerprint                            | Bit/Smiles | Feature Structure                     | Score | Moderate_Severe in training set |
| FCFP_10                                | 365650923  | <br><chem>[*]OCCO[c](:[*]):[*]</chem> | 0.386 | 17 out of 17                    |

|                                        |             |                                                                                                                                                       |        |                                    |
|----------------------------------------|-------------|-------------------------------------------------------------------------------------------------------------------------------------------------------|--------|------------------------------------|
| FCFP_10                                | -1059904848 | 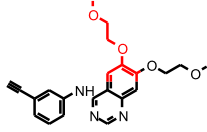<br>[*][c]([*]):[c](OCCO<br>C):[cH]:[*]                            | 0.386  | 17 out of 17                       |
| FCFP_10                                | -1716224640 | <br>[*][c]1:[*]:[cH]:[c]2<br>:[c]([*]):[*]:[cH]:n<br>:[c]:2:[cH]:1 | 0.294  | 3 out of 3                         |
| Top Features for negative contribution |             |                                                                                                                                                       |        |                                    |
| Fingerprint                            | Bit/Smiles  | Feature Structure                                                                                                                                     | Score  | Moderate_Severe<br>in training set |
| FCFP_10                                | -1699003333 | <br>[*]N[c]1:[cH]:[cH]:[c<br>H]:[c](:[cH]:1)C#[*]                  | -1.09  | 2 out of 12                        |
| FCFP_10                                | 1679603620  | <br>[*]O[c]1:[cH]:[c](:n:<br>[*]):[c]([*]):[*]:[<br>c]:1[*]       | -0.507 | 0 out of 1                         |
| FCFP_10                                | 341504799   | <br>[*]CCOC                                                      | -0.425 | 7 out of 17                        |

## Compound 5

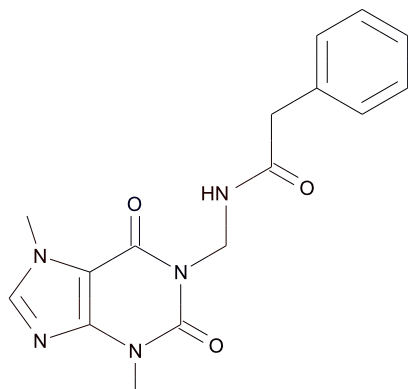

$C_{16}H_{17}N_5O_3$

Molecular Weight: 327.33788

ALogP: 0.773

Rotatable Bonds: 4

Acceptors: 4

Donors: 1

### Model Prediction

Prediction: Irritant

Probability: 1

Enrichment: 1.18

Bayesian Score: 1.1

Mahalanobis Distance: 6.16

Mahalanobis Distance p-value: 1

Prediction: Positive if the Bayesian score is above the estimated best cutoff value from minimizing the false positive and false negative rate.

Probability: The estimated probability that the sample is in the positive category. This assumes that the Bayesian score follows a normal distribution and is different from the prediction using a cutoff.

Enrichment: An estimate of enrichment, that is, the increased likelihood (versus random) of this sample being in the category.

Bayesian Score: The standard Laplacian-modified Bayesian score.

Mahalanobis Distance: The Mahalanobis distance (MD) is the distance to the center of the training data. The larger the MD, the less trustworthy the prediction.

Mahalanobis Distance p-value: The p-value gives the fraction of training data with an MD greater than or equal to the one for the given sample, assuming normally distributed data. The smaller the p-value, the less trustworthy the prediction. For highly non-normal X properties (e.g., fingerprints), the MD p-value is wildly inaccurate.

## TOPKAT\_Ocular\_Irritancy\_None\_vs\_Irritant

### Structural Similar Compounds

| Name               | 2,5-DICHLORO-4(3'-METHYL-5' PYRAZOLON-1'-YL)BENZENE SULFONIC ACID | Ammonium; ((N-anthraquinon-2-yl)aminomethylene)dimethyl-; chloride    | 0-ANISIDINE;ACETOACETYL |
|--------------------|-------------------------------------------------------------------|-----------------------------------------------------------------------|-------------------------|
| Structure          |                                                                   |                                                                       |                         |
| Actual Endpoint    | Irritant                                                          | Irritant                                                              | Irritant                |
| Predicted Endpoint | Irritant                                                          | Irritant                                                              | Irritant                |
| Distance           | 0.657                                                             | 0.674                                                                 | 0.674                   |
| Reference          | 28ZPAK-;186;72                                                    | Prehled Prumyslove Toxikologie; Organické Latky; Marhold; J. -;732;86 | 28ZPAK-;116;72          |

### Model Applicability

Unknown features are fingerprint features in the query molecule, but not found or appearing too infrequently in the training set.

1. All properties and OPS components are within expected ranges.
2. Unknown FCFP\_2 feature: -124685461: [\*]n1:[\*]:[\*]:n:[cH]:1
3. Unknown FCFP\_2 feature: 136150461: [\*]:n(:[\*])C

### Feature Contribution

| Top features for positive contribution |            |                                 |       |                          |
|----------------------------------------|------------|---------------------------------|-------|--------------------------|
| Fingerprint                            | Bit/Smiles | Feature Structure               | Score | Irritant in training set |
| FCFP_12                                | 1747237384 | <p>[*][c]1:[*]:[*]:[cH]:n:1</p> | 0.208 | 44 out of 44             |

| FCFP_12                                | -1539132615 | 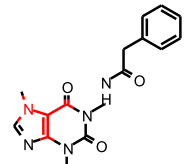<br><chem>[*]n1:[*]:[*]:[c]([*]):[c]:1C(=[*])[*]</chem> | 0.197   | 13 out of 13             |
|----------------------------------------|-------------|--------------------------------------------------------------------------------------------------------------------------------------------|---------|--------------------------|
| FCFP_12                                | 17          | <br><chem>[*]n(:[*]):[*]</chem>                         | 0.189   | 48 out of 49             |
| Top Features for negative contribution |             |                                                                                                                                            |         |                          |
| Fingerprint                            | Bit/Smiles  | Feature Structure                                                                                                                          | Score   | Irritant in training set |
| FCFP_12                                | -1549163031 | <br><chem>[*]N([*])C(=O)[c]([*]):[*]</chem>             | -0.623  | 16 out of 38             |
| FCFP_12                                | 1981711554  | <br><chem>[*]C(=[*])C[c]1:[cH]:[cH]:[cH]:[cH]:1</chem> | -0.103  | 5 out of 7               |
| FCFP_12                                | -1698724694 | <br><chem>[*]C[c]1:[cH]:[cH]:[cH]:[cH]:[cH]:1</chem>  | -0.0964 | 107 out of 146           |

# Erlotinib

# TOPKAT\_Ocular\_Irritancy\_None\_vs\_Irritant

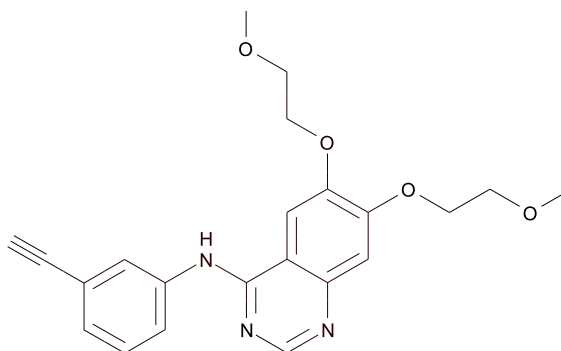

$C_{22}H_{23}N_3O_4$

Molecular Weight: 393.43572

ALogP: 4.309

Rotatable Bonds: 10

Acceptors: 7

Donors: 1

## Model Prediction

**Prediction: Irritant**

Probability: 1

Enrichment: 1.18

Bayesian Score: 2.13

Mahalanobis Distance: 9.75

Mahalanobis Distance p-value: 0.161

Prediction: Positive if the Bayesian score is above the estimated best cutoff value from minimizing the false positive and false negative rate.

Probability: The estimated probability that the sample is in the positive category. This assumes that the Bayesian score follows a normal distribution and is different from the prediction using a cutoff.

Enrichment: An estimate of enrichment, that is, the increased likelihood (versus random) of this sample being in the category.

Bayesian Score: The standard Laplacian-modified Bayesian score.

Mahalanobis Distance: The Mahalanobis distance (MD) is the distance to the center of the training data. The larger the MD, the less trustworthy the prediction.

Mahalanobis Distance p-value: The p-value gives the fraction of training data with an MD greater than or equal to the one for the given sample, assuming normally distributed data. The smaller the p-value, the less trustworthy the prediction. For highly non-normal X properties (e.g., fingerprints), the MD p-value is wildly inaccurate.

## Structural Similar Compounds

| Name               | Benzoic acid; p-(N-butyl-2-(butylamino)acetamido)-; butyl ester; | COLCHICINE       | Cinchoninamide; 2-butoxy-N-(2-(diethylamino)ethyl)-; monohydrochloride |
|--------------------|------------------------------------------------------------------|------------------|------------------------------------------------------------------------|
| Structure          |                                                                  |                  |                                                                        |
| Actual Endpoint    | Irritant                                                         | Irritant         | Irritant                                                               |
| Predicted Endpoint | Non-Irritant                                                     | Irritant         | Irritant                                                               |
| Distance           | 0.637                                                            | 0.682            | 0.747                                                                  |
| Reference          | Arzneimittel-Forschung 8;609;58                                  | AJOPAA 31;837;48 | Arzneimittel-Forschung 8;181;58                                        |

## Model Applicability

Unknown features are fingerprint features in the query molecule, but not found or appearing too infrequently in the training set.

1. All properties and OPS components are within expected ranges.
2. Unknown FCFP\_2 feature: -1151884458: [\*]N[c](:n:[\*]):[c](:[\*]):[\*]
3. Unknown FCFP\_2 feature: -124685461: [\*]n1:[\*]:[\*]:n:[cH]:1
4. Unknown FCFP\_2 feature: 902193919: [\*]:[c](:[\*])C#C

## Feature Contribution

| Top features for positive contribution |            |                              |       |                          |
|----------------------------------------|------------|------------------------------|-------|--------------------------|
| Fingerprint                            | Bit/Smiles | Feature Structure            | Score | Irritant in training set |
| FCFP_12                                | 1747237384 | <br>[*][c]1:[*]:[*]:[cH]:n:1 | 0.208 | 44 out of 44             |

|                                        |            |                                                                                                                                 |       |                          |
|----------------------------------------|------------|---------------------------------------------------------------------------------------------------------------------------------|-------|--------------------------|
| FCFP_12                                | 178336375  | 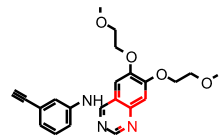<br>[*]:[cH]:[c](:n:[*]):<br>[c](:[*]):[*]   | 0.202 | 19 out of 19             |
| FCFP_12                                | 17         | <br>[*]n(:[*]):[*]                           | 0.189 | 48 out of 49             |
| Top Features for negative contribution |            |                                                                                                                                 |       |                          |
| Fingerprint                            | Bit/Smiles | Feature Structure                                                                                                               | Score | Irritant in training set |
| FCFP_12                                | -453677277 | <br>[*]C[c]1:[cH]:[*]:[cH]<br>:[cH]:[cH]:1   | 0     | 264 out of 323           |
| FCFP_12                                | 991735244  | <br>[*][c]1:[*]:[cH]:[cH]<br>:[cH]:[cH]:1   | 0     | 237 out of 291           |
| FCFP_12                                | -773983804 | <br>[*]N[c]1:[cH]:[*]:[cH]<br>:[cH]:[cH]:1 | 0     | 102 out of 121           |

## Compound 5

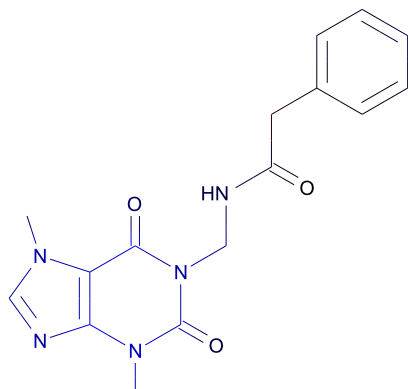

$C_{16}H_{17}N_5O_3$

Molecular Weight: 327.33788

ALogP: 0.773

Rotatable Bonds: 4

Acceptors: 4

Donors: 1

### Model Prediction

Prediction: Non-Carcinogen

Probability: 0.199

Enrichment: 0.618

Bayesian Score: -7.3

Mahalanobis Distance: 12.4

Mahalanobis Distance p-value: 0.0011

Prediction: Positive if the Bayesian score is above the estimated best cutoff value from minimizing the false positive and false negative rate.

Probability: The estimated probability that the sample is in the positive category. This assumes that the Bayesian score follows a normal distribution and is different from the prediction using a cutoff.

Enrichment: An estimate of enrichment, that is, the increased likelihood (versus random) of this sample being in the category.

Bayesian Score: The standard Laplacian-modified Bayesian score.

Mahalanobis Distance: The Mahalanobis distance (MD) is the distance to the center of the training data. The larger the MD, the less trustworthy the prediction.

Mahalanobis Distance p-value: The p-value gives the fraction of training data with an MD greater than or equal to the one for the given sample, assuming normally distributed data. The smaller the p-value, the less trustworthy the prediction. For highly non-normal X properties (e.g., fingerprints), the MD p-value is wildly inaccurate.

## TOPKAT\_Rat\_Female\_FDA\_None\_vs\_Carcinogen

### Structural Similar Compounds

| Name               | Pentoxifylline                                                      | Scopolamine                                                         | Fluconazole                                                         |
|--------------------|---------------------------------------------------------------------|---------------------------------------------------------------------|---------------------------------------------------------------------|
| Structure          |                                                                     |                                                                     |                                                                     |
| Actual Endpoint    | Non-Carcinogen                                                      | Non-Carcinogen                                                      | Non-Carcinogen                                                      |
| Predicted Endpoint | Non-Carcinogen                                                      | Non-Carcinogen                                                      | Non-Carcinogen                                                      |
| Distance           | 0.514                                                               | 0.576                                                               | 0.588                                                               |
| Reference          | US FDA (Centre for Drug Eval.& Res./Off. Testing & Res.) Sept. 1997 | US FDA (Centre for Drug Eval.& Res./Off. Testing & Res.) Sept. 1997 | US FDA (Centre for Drug Eval.& Res./Off. Testing & Res.) Sept. 1997 |

### Model Applicability

Unknown features are fingerprint features in the query molecule, but not found or appearing too infrequently in the training set.

1. All properties and OPS components are within expected ranges.
2. Unknown ECFP\_2 feature: -39630146: [\*]NCN([\*])[\*]

### Feature Contribution

#### Top features for positive contribution

| Fingerprint | Bit/Smiles | Feature Structure                               | Score | Carcinogen in training set |
|-------------|------------|-------------------------------------------------|-------|----------------------------|
| ECFP_12     | 1737023319 | <br>[*]C(=*)C[c]1:[cH]:<br>[cH]:[*]:[cH]:[cH]:1 | 0.613 | 2 out of 2                 |

| ECFP_12                                | -407983022 | 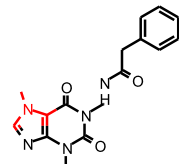<br>[*][c]1:[*]:[*]:[cH]:<br>n:1C                | 0.437  | 2 out of 3                 |
|----------------------------------------|------------|-------------------------------------------------------------------------------------------------------------------------------------|--------|----------------------------|
| ECFP_12                                | 866450950  | <br>[*]:n(:[*])C                                 | 0.33   | 3 out of 6                 |
| Top Features for negative contribution |            |                                                                                                                                     |        |                            |
| Fingerprint                            | Bit/Smiles | Feature Structure                                                                                                                   | Score  | Carcinogen in training set |
| ECFP_12                                | 497523368  | <br>[*]CNC(=[*])[*]                              | -0.989 | 1 out of 14                |
| ECFP_12                                | -281505363 | <br>[*][c]1:[cH]:[cH]:[cH]:[cH]<br>:[cH]:[cH]:1 | -0.56  | 11 out of 64               |
| ECFP_12                                | 1571214559 | <br>[*]1:[cH]:[cH]:[cH]:[cH]:[cH]:[cH]:1       | -0.56  | 11 out of 64               |



# Erlotinib

# TOPKAT\_Rat\_Female\_FDA\_None\_vs\_Carcinogen

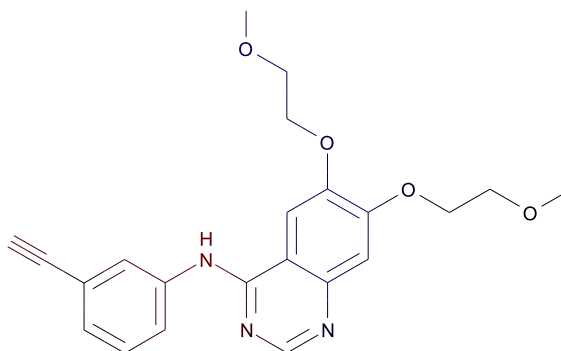

$C_{22}H_{23}N_3O_4$

Molecular Weight: 393.43572

ALogP: 4.309

Rotatable Bonds: 10

Acceptors: 7

Donors: 1

## Model Prediction

Prediction: Carcinogen

Probability: 0.285

Enrichment: 0.885

Bayesian Score: -0.692

Mahalanobis Distance: 16.3

Mahalanobis Distance p-value: 1.65e-011

Prediction: Positive if the Bayesian score is above the estimated best cutoff value from minimizing the false positive and false negative rate.

Probability: The estimated probability that the sample is in the positive category. This assumes that the Bayesian score follows a normal distribution and is different from the prediction using a cutoff.

Enrichment: An estimate of enrichment, that is, the increased likelihood (versus random) of this sample being in the category.

Bayesian Score: The standard Laplacian-modified Bayesian score.

Mahalanobis Distance: The Mahalanobis distance (MD) is the distance to the center of the training data. The larger the MD, the less trustworthy the prediction.

Mahalanobis Distance p-value: The p-value gives the fraction of training data with an MD greater than or equal to the one for the given sample, assuming normally distributed data. The smaller the p-value, the less trustworthy the prediction. For highly non-normal X properties (e.g., fingerprints), the MD p-value is wildly inaccurate.

## Structural Similar Compounds

| Name               | Mycophenolate                                                       | Nicardipine                                                         | Nimodipine                                                          |
|--------------------|---------------------------------------------------------------------|---------------------------------------------------------------------|---------------------------------------------------------------------|
| Structure          |                                                                     |                                                                     |                                                                     |
| Actual Endpoint    | Non-Carcinogen                                                      | Carcinogen                                                          | Non-Carcinogen                                                      |
| Predicted Endpoint | Non-Carcinogen                                                      | Carcinogen                                                          | Non-Carcinogen                                                      |
| Distance           | 0.644                                                               | 0.660                                                               | 0.675                                                               |
| Reference          | US FDA (Centre for Drug Eval.& Res./Off. Testing & Res.) Sept. 1997 | US FDA (Centre for Drug Eval.& Res./Off. Testing & Res.) Sept. 1997 | US FDA (Centre for Drug Eval.& Res./Off. Testing & Res.) Sept. 1997 |

## Model Applicability

Unknown features are fingerprint features in the query molecule, but not found or appearing too infrequently in the training set.

- OPS PC28 out of range. Value: 3.6564. Training min, max, SD, explained variance: -2.8936, 3.5771, 1.028, 0.0111.
- Unknown ECFP\_2 feature: 1139738044: [\*]:[c](:[\*])C#C

## Feature Contribution

| Top features for positive contribution |             |                   |       |                            |
|----------------------------------------|-------------|-------------------|-------|----------------------------|
| Fingerprint                            | Bit/Smiles  | Feature Structure | Score | Carcinogen in training set |
| ECFP_12                                | -1545539812 | <br>[*]C#C        | 0.78  | 8 out of 10                |

| ECFP_12                                | -1939823063 | 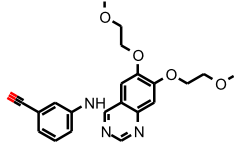<br>[*]#C                                         | 0.78   | 8 out of 10                |
|----------------------------------------|-------------|--------------------------------------------------------------------------------------------------------------------------------------|--------|----------------------------|
| ECFP_12                                | -177077903  | <br>[*]N[c](:[cH]:[*]):[cH]:[*]                   | 0.529  | 6 out of 10                |
| Top Features for negative contribution |             |                                                                                                                                      |        |                            |
| Fingerprint                            | Bit/Smiles  | Feature Structure                                                                                                                    | Score  | Carcinogen in training set |
| ECFP_12                                | -2063600634 | <br>[*]O[c]1:[cH]:[c](:[c]([*]):[*]):[c]([*]):[*] | -0.661 | 0 out of 3                 |
| ECFP_12                                | 301015111   | <br>[*]CCOC                                      | -0.661 | 0 out of 3                 |
| ECFP_12                                | -1253653003 | <br>[*]COC                                      | -0.661 | 0 out of 3                 |

# Erlotinib

# TOPKAT\_Rat\_Female\_FDA\_Single\_vs\_Multiple

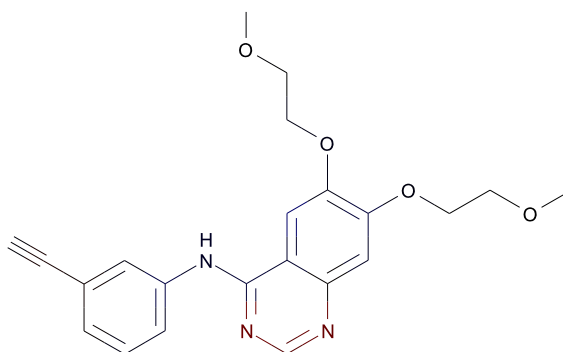

C<sub>22</sub>H<sub>23</sub>N<sub>3</sub>O<sub>4</sub>

Molecular Weight: 393.43572

ALogP: 4.309

Rotatable Bonds: 10

Acceptors: 7

Donors: 1

## Model Prediction

Prediction: Single-Carcinogen

Probability: 0.423

Enrichment: 1.13

Bayesian Score: -2.63

Mahalanobis Distance: 15.2

Mahalanobis Distance p-value: 2.08e-006

Prediction: Positive if the Bayesian score is above the estimated best cutoff value from minimizing the false positive and false negative rate.

Probability: The estimated probability that the sample is in the positive category. This assumes that the Bayesian score follows a normal distribution and is different from the prediction using a cutoff.

Enrichment: An estimate of enrichment, that is, the increased likelihood (versus random) of this sample being in the category.

Bayesian Score: The standard Laplacian-modified Bayesian score.

Mahalanobis Distance: The Mahalanobis distance (MD) is the distance to the center of the training data. The larger the MD, the less trustworthy the prediction.

Mahalanobis Distance p-value: The p-value gives the fraction of training data with an MD greater than or equal to the one for the given sample, assuming normally distributed data. The smaller the p-value, the less trustworthy the prediction. For highly non-normal X properties (e.g., fingerprints), the MD p-value is wildly inaccurate.

## Structural Similar Compounds

| Name               | Nicardipine                                                         | Diltiazem                                                           | Moricizine                                                          |
|--------------------|---------------------------------------------------------------------|---------------------------------------------------------------------|---------------------------------------------------------------------|
| Structure          |                                                                     |                                                                     |                                                                     |
| Actual Endpoint    | Single-Carcinogen                                                   | Multiple-Carcinogen                                                 | Single-Carcinogen                                                   |
| Predicted Endpoint | Single-Carcinogen                                                   | Multiple-Carcinogen                                                 | Single-Carcinogen                                                   |
| Distance           | 0.632                                                               | 0.748                                                               | 0.749                                                               |
| Reference          | US FDA (Centre for Drug Eval.& Res./Off. Testing & Res.) Sept. 1997 | US FDA (Centre for Drug Eval.& Res./Off. Testing & Res.) Sept. 1997 | US FDA (Centre for Drug Eval.& Res./Off. Testing & Res.) Sept. 1997 |

## Model Applicability

Unknown features are fingerprint features in the query molecule, but not found or appearing too infrequently in the training set.

1. All properties and OPS components are within expected ranges.

## Feature Contribution

### Top features for positive contribution

| Fingerprint | Bit/Smiles  | Feature Structure                        | Score | Multiple-Carcinogen in training set |
|-------------|-------------|------------------------------------------|-------|-------------------------------------|
| SCFP_4      | -1065373877 | <br>[*][c]1:[*]:[c](:[*])<br>:n:[cH]:n:1 | 0.721 | 3 out of 3                          |

|                                        |             |                                                                                                                                                       |        |                                     |
|----------------------------------------|-------------|-------------------------------------------------------------------------------------------------------------------------------------------------------|--------|-------------------------------------|
| SCFP_4                                 | -1181430618 | 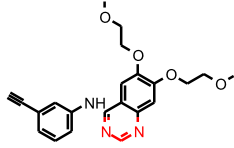<br>[*]:n:[cH]:n:[*]                                               | 0.663  | 4 out of 5                          |
| SCFP_4                                 | 2142015375  | <br>[*]:[cH]:[c]1:n:[cH]:<br>n:[*]:[c]:1:[*]                       | 0.433  | 2 out of 3                          |
| Top Features for negative contribution |             |                                                                                                                                                       |        |                                     |
| Fingerprint                            | Bit/Smiles  | Feature Structure                                                                                                                                     | Score  | Multiple-Carcinogen in training set |
| SCFP_4                                 | 622342378   | <br>[*][c]1:[*]:[cH]:[c]2<br>:[c]([*]):[*]:[cH]:n<br>:[c]:2:[cH]:1 | -0.816 | 0 out of 4                          |
| SCFP_4                                 | 112346096   | <br>[*][c](:[*]):[c](:[cH<br>]:[*]):[c](:[*]):[*]                | -0.73  | 1 out of 10                         |
| SCFP_4                                 | 1242547645  | <br>[*]CO[c]1:[cH]:[c](:[<br>*]):[*]:[cH]:[c]:1O[<br>*]          | -0.489 | 0 out of 2                          |



## Compound 5

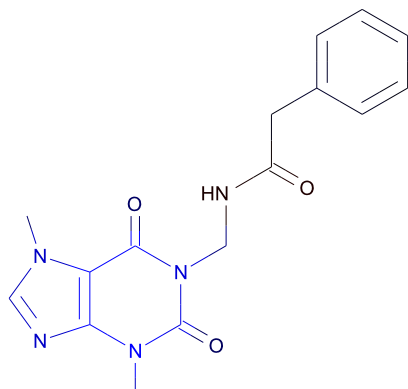

C<sub>16</sub>H<sub>17</sub>N<sub>5</sub>O<sub>3</sub>

Molecular Weight: 327.33788

ALogP: 0.773

Rotatable Bonds: 4

Acceptors: 4

Donors: 1

### Model Prediction

Prediction: Non-Carcinogen

Probability: 0.192

Enrichment: 0.575

Bayesian Score: -7.89

Mahalanobis Distance: 12.5

Mahalanobis Distance p-value: 0.00654

Prediction: Positive if the Bayesian score is above the estimated best cutoff value from minimizing the false positive and false negative rate.

Probability: The estimated probability that the sample is in the positive category. This assumes that the Bayesian score follows a normal distribution and is different from the prediction using a cutoff.

Enrichment: An estimate of enrichment, that is, the increased likelihood (versus random) of this sample being in the category.

Bayesian Score: The standard Laplacian-modified Bayesian score.

Mahalanobis Distance: The Mahalanobis distance (MD) is the distance to the center of the training data. The larger the MD, the less trustworthy the prediction.

Mahalanobis Distance p-value: The p-value gives the fraction of training data with an MD greater than or equal to the one for the given sample, assuming normally distributed data. The smaller the p-value, the less trustworthy the prediction. For highly non-normal X properties (e.g., fingerprints), the MD p-value is wildly inaccurate.

## TOPKAT\_Rat\_Male\_FDA\_None\_vs\_Carcinogen

### Structural Similar Compounds

| Name               | Pentoxifylline                                                      | Scopolamine                                                         | Fluconazole                                                         |
|--------------------|---------------------------------------------------------------------|---------------------------------------------------------------------|---------------------------------------------------------------------|
| Structure          |                                                                     |                                                                     |                                                                     |
| Actual Endpoint    | Non-Carcinogen                                                      | Non-Carcinogen                                                      | Carcinogen                                                          |
| Predicted Endpoint | Non-Carcinogen                                                      | Non-Carcinogen                                                      | Carcinogen                                                          |
| Distance           | 0.464                                                               | 0.565                                                               | 0.568                                                               |
| Reference          | US FDA (Centre for Drug Eval.& Res./Off. Testing & Res.) Sept. 1997 | US FDA (Centre for Drug Eval.& Res./Off. Testing & Res.) Sept. 1997 | US FDA (Centre for Drug Eval.& Res./Off. Testing & Res.) Sept. 1997 |

### Model Applicability

Unknown features are fingerprint features in the query molecule, but not found or appearing too infrequently in the training set.

1. All properties and OPS components are within expected ranges.

### Feature Contribution

| Top features for positive contribution |            |                                             |       |                            |
|----------------------------------------|------------|---------------------------------------------|-------|----------------------------|
| Fingerprint                            | Bit/Smiles | Feature Structure                           | Score | Carcinogen in training set |
| SCFP_6                                 | 1394899299 | <br>[*]NC(=O)C(c)[c]1:[cH]:[cH]:[cH]:[cH]:1 | 0.415 | 1 out of 1                 |

| SCFP_6                                 | 136358998  | 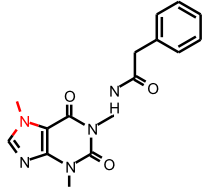<br>[*]:n(:[*])C                                    | 0.313  | 3 out of 6                 |
|----------------------------------------|------------|----------------------------------------------------------------------------------------------------------------------------------------|--------|----------------------------|
| SCFP_6                                 | 8          | <br>[*]n(:[*]):[*]                                  | 0.24   | 39 out of 95               |
| Top Features for negative contribution |            |                                                                                                                                        |        |                            |
| Fingerprint                            | Bit/Smiles | Feature Structure                                                                                                                      | Score  | Carcinogen in training set |
| SCFP_6                                 | 399659969  | <br>[*]CN(C(=[*])[*])C(=[*])[*]                     | -0.578 | 1 out of 8                 |
| SCFP_6                                 | 1653911926 | <br>[*][c]1:[cH]:[cH]:[cH]:[cH]:[cH]:[cH]:1        | -0.504 | 12 out of 64               |
| SCFP_6                                 | 1445006032 | <br>[*]CN1C(=[*])[*][c]2:[*]:[*]:n([*]):[c]:2C1=O | -0.496 | 0 out of 2                 |

# Erlotinib

# TOPKAT\_Rat\_Male\_FDA\_None\_vs\_Carcinogen

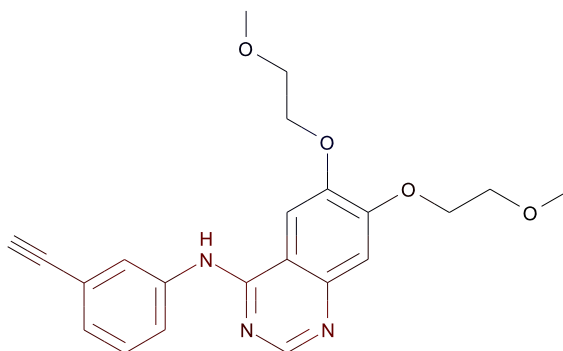

$C_{22}H_{23}N_3O_4$

Molecular Weight: 393.43572

ALogP: 4.309

Rotatable Bonds: 10

Acceptors: 7

Donors: 1

## Model Prediction

**Prediction: Carcinogen**

Probability: 0.52

Enrichment: 1.56

Bayesian Score: 4.91

Mahalanobis Distance: 17.4

Mahalanobis Distance p-value: 2.91e-012

Prediction: Positive if the Bayesian score is above the estimated best cutoff value from minimizing the false positive and false negative rate.

Probability: The estimated probability that the sample is in the positive category. This assumes that the Bayesian score follows a normal distribution and is different from the prediction using a cutoff.

Enrichment: An estimate of enrichment, that is, the increased likelihood (versus random) of this sample being in the category. Bayesian Score: The standard Laplacian-modified Bayesian score.

Mahalanobis Distance: The Mahalanobis distance (MD) is the distance to the center of the training data. The larger the MD, the less trustworthy the prediction.

Mahalanobis Distance p-value: The p-value gives the fraction of training data with an MD greater than or equal to the one for the given sample, assuming normally distributed data. The smaller the p-value, the less trustworthy the prediction. For highly non-normal X properties (e.g., fingerprints), the MD p-value is wildly inaccurate.

## Structural Similar Compounds

| Name               | Mycophenolate                                                       | Nicardipine                                                         | Nimodipine                                                          |
|--------------------|---------------------------------------------------------------------|---------------------------------------------------------------------|---------------------------------------------------------------------|
| Structure          |                                                                     |                                                                     |                                                                     |
| Actual Endpoint    | Non-Carcinogen                                                      | Carcinogen                                                          | Carcinogen                                                          |
| Predicted Endpoint | Non-Carcinogen                                                      | Carcinogen                                                          | Carcinogen                                                          |
| Distance           | 0.624                                                               | 0.667                                                               | 0.676                                                               |
| Reference          | US FDA (Centre for Drug Eval.& Res./Off. Testing & Res.) Sept. 1997 | US FDA (Centre for Drug Eval.& Res./Off. Testing & Res.) Sept. 1997 | US FDA (Centre for Drug Eval.& Res./Off. Testing & Res.) Sept. 1997 |

## Model Applicability

Unknown features are fingerprint features in the query molecule, but not found or appearing too infrequently in the training set.

1. All properties and OPS components are within expected ranges.

## Feature Contribution

### Top features for positive contribution

| Fingerprint | Bit/Smiles | Feature Structure                                       | Score | Carcinogen in training set |
|-------------|------------|---------------------------------------------------------|-------|----------------------------|
| SCFP_6      | 123285475  | <p>[*]O[c]1:[cH]:[c](:n:[*]):[c](:[*]):[*]:[c]:1[*]</p> | 0.429 | 3 out of 5                 |



|                                        |             |                                                                                                                                                                                                |        |                            |
|----------------------------------------|-------------|------------------------------------------------------------------------------------------------------------------------------------------------------------------------------------------------|--------|----------------------------|
| SCFP_6                                 | -1065373877 | 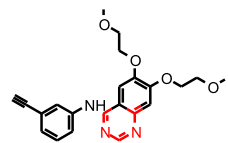<br><chem>[*][c]1:[*]:[c](:[*])</chem><br><chem>:n:[cH]:n:1</chem>                                          | 0.429  | 3 out of 5                 |
| SCFP_6                                 | -2020651081 | <br><chem>[*][c]1:[cH]:[cH]:[cH]:[cH]</chem><br><chem>]:[c](N[c](:[*]):[*])</chem><br><chem>):[cH]:1</chem> | 0.415  | 1 out of 1                 |
| Top Features for negative contribution |             |                                                                                                                                                                                                |        |                            |
| Fingerprint                            | Bit/Smiles  | Feature Structure                                                                                                                                                                              | Score  | Carcinogen in training set |
| SCFP_6                                 | 125474664   | <br><chem>[*]O[c]1:[cH]:[c](:[c</chem><br><chem>]([*]):[*]):[c](:[*])</chem><br><chem>):[*]:[c]:1[*]</chem> | -0.484 | 1 out of 7                 |
| SCFP_6                                 | -417738003  | <br><chem>[*]OCCOC</chem>                                                                                 | -0.264 | 1 out of 5                 |
| SCFP_6                                 | 951581613   | <br><chem>[*]:[c](:[*])N[c](:[*</chem><br><chem>]):[*]</chem>                                             | -0.132 | 1 out of 4                 |

# Erlotinib

# TOPKAT\_Rat\_Male\_FDA\_Single\_vs\_Multiple

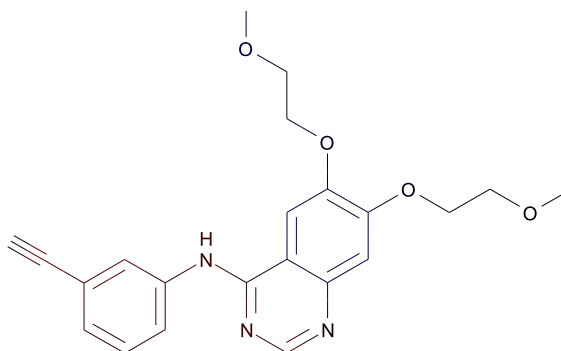

$C_{22}H_{23}N_3O_4$

Molecular Weight: 393.43572

ALogP: 4.309

Rotatable Bonds: 10

Acceptors: 7

Donors: 1

## Model Prediction

Prediction: Multiple-Carcinogen

Probability: 0.568

Enrichment: 1.37

Bayesian Score: 0.821

Mahalanobis Distance: 16.5

Mahalanobis Distance p-value: 4.64e-007

Prediction: Positive if the Bayesian score is above the estimated best cutoff value from minimizing the false positive and false negative rate.

Probability: The estimated probability that the sample is in the positive category. This assumes that the Bayesian score follows a normal distribution and is different from the prediction using a cutoff.

Enrichment: An estimate of enrichment, that is, the increased likelihood (versus random) of this sample being in the category.

Bayesian Score: The standard Laplacian-modified Bayesian score.

Mahalanobis Distance: The Mahalanobis distance (MD) is the distance to the center of the training data. The larger the MD, the less trustworthy the prediction.

Mahalanobis Distance p-value: The p-value gives the fraction of training data with an MD greater than or equal to the one for the given sample, assuming normally distributed data. The smaller the p-value, the less trustworthy the prediction. For highly non-normal X properties (e.g., fingerprints), the MD p-value is wildly inaccurate.

## Structural Similar Compounds

| Name               | Nicardipine                                                         | Nimodipine                                                          | Felodipine                                                          |
|--------------------|---------------------------------------------------------------------|---------------------------------------------------------------------|---------------------------------------------------------------------|
| Structure          |                                                                     |                                                                     |                                                                     |
| Actual Endpoint    | Single-Carcinogen                                                   | Single-Carcinogen                                                   | Single-Carcinogen                                                   |
| Predicted Endpoint | Single-Carcinogen                                                   | Single-Carcinogen                                                   | Single-Carcinogen                                                   |
| Distance           | 0.685                                                               | 0.700                                                               | 0.721                                                               |
| Reference          | US FDA (Centre for Drug Eval.& Res./Off. Testing & Res.) Sept. 1997 | US FDA (Centre for Drug Eval.& Res./Off. Testing & Res.) Sept. 1997 | US FDA (Centre for Drug Eval.& Res./Off. Testing & Res.) Sept. 1997 |

## Model Applicability

Unknown features are fingerprint features in the query molecule, but not found or appearing too infrequently in the training set.

1. All properties and OPS components are within expected ranges.

## Feature Contribution

### Top features for positive contribution

| Fingerprint | Bit/Smiles  | Feature Structure                       | Score | Multiple-Carcinogen in training set |
|-------------|-------------|-----------------------------------------|-------|-------------------------------------|
| SCFP_8      | -1065373877 | <br>[*][c]1:[*]:[c]([*])<br>:n:[cH]:n:1 | 0.649 | 3 out of 3                          |

|                                        |             |                                                                                                                                                                      |        |                                     |
|----------------------------------------|-------------|----------------------------------------------------------------------------------------------------------------------------------------------------------------------|--------|-------------------------------------|
| SCFP_8                                 | 2           | 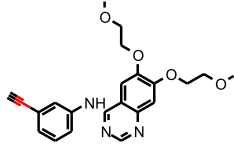<br><chem>[*]C#[*]</chem>                                                         | 0.584  | 6 out of 8                          |
| SCFP_8                                 | -1181430618 | <br><chem>[*]:n:[cH]:n:[*]</chem>                                                 | 0.453  | 4 out of 6                          |
| Top Features for negative contribution |             |                                                                                                                                                                      |        |                                     |
| Fingerprint                            | Bit/Smiles  | Feature Structure                                                                                                                                                    | Score  | Multiple-Carcinogen in training set |
| SCFP_8                                 | 136239834   | <br><chem>[*]OC</chem>                                                            | -0.358 | 3 out of 13                         |
| SCFP_8                                 | 129215346   | <br><chem>[*]N[c]1:n:[*]:n:[c]2<br/>:[cH]:[*]:[c]([*]):[<br/>cH]:[c]:1:2</chem> | -0.31  | 0 out of 1                          |
| SCFP_8                                 | -417738003  | <br><chem>[*]OCCOC</chem>                                                       | -0.31  | 0 out of 1                          |



## Compound 5

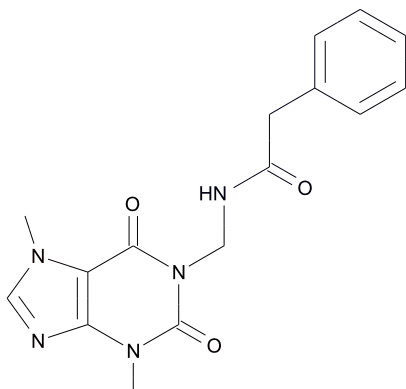

$C_{16}H_{17}N_5O_3$

Molecular Weight: 327.33788

ALogP: 0.773

Rotatable Bonds: 4

Acceptors: 4

Donors: 1

### Model Prediction

Prediction: Non-Irritant

Probability: 0.971

Enrichment: 1.05

Bayesian Score: -0.948

Mahalanobis Distance: 10.8

Mahalanobis Distance p-value: 0.00577

Prediction: Positive if the Bayesian score is above the estimated best cutoff value from minimizing the false positive and false negative rate.

Probability: The estimated probability that the sample is in the positive category. This assumes that the Bayesian score follows a normal distribution and is different from the prediction using a cutoff.

Enrichment: An estimate of enrichment, that is, the increased likelihood (versus random) of this sample being in the category. Bayesian Score: The standard Laplacian-modified Bayesian score.

Mahalanobis Distance: The Mahalanobis distance (MD) is the distance to the center of the training data. The larger the MD, the less trustworthy the prediction.

Mahalanobis Distance p-value: The p-value gives the fraction of training data with an MD greater than or equal to the one for the given sample, assuming normally distributed data. The smaller the p-value, the less trustworthy the prediction. For highly non-normal X properties (e.g., fingerprints), the MD p-value is wildly inaccurate.

## TOPKAT\_Skin\_Irritancy\_None\_vs\_Irritant

### Structural Similar Compounds

| Name               | 1-(Butylsulfonyl)-4-pipecoline | Benzothiazolesulfonamide, N-(1-methylethyl)-                                                                                                                                   | Benzenesulfonic acid, 3-(diethylamino)-, sodium salt                                                                                               |
|--------------------|--------------------------------|--------------------------------------------------------------------------------------------------------------------------------------------------------------------------------|----------------------------------------------------------------------------------------------------------------------------------------------------|
| Structure          |                                |                                                                                                                                                                                |                                                                                                                                                    |
| Actual Endpoint    | Irritant                       | Irritant                                                                                                                                                                       | Irritant                                                                                                                                           |
| Predicted Endpoint | Non-Irritant                   | Non-Irritant                                                                                                                                                                   | Non-Irritant                                                                                                                                       |
| Distance           | 0.678                          | 0.710                                                                                                                                                                          | 0.711                                                                                                                                              |
| Reference          | US ARMY                        | AMIHBC AMA Archives of Industrial Hygiene and Occupational Medicine. (Chicago, IL) V.2-10, 1950-54. For publisher information, see AEHLAU. Volume(issue)/page/year: 5,311,1952 | 85JCAE "Prehled Prumyslove Toxikologie; Organické Latky," Marhold, J., Prague, Czechoslovakia, Avicenum, 1986 Volume(issue)/page/year: -,1056,1986 |

### Model Applicability

Unknown features are fingerprint features in the query molecule, but not found or appearing too infrequently in the training set.

1. All properties and OPS components are within expected ranges.
2. Unknown FCFP\_2 feature: 136150461: [\*]:n(:[\*])C

### Feature Contribution

#### Top features for positive contribution

| Fingerprint | Bit/Smiles | Feature Structure | Score | Irritant in training set |
|-------------|------------|-------------------|-------|--------------------------|
|-------------|------------|-------------------|-------|--------------------------|

|                                        |             |                                                                                                                                            |        |                          |
|----------------------------------------|-------------|--------------------------------------------------------------------------------------------------------------------------------------------|--------|--------------------------|
| FCFP_12                                | -1986158408 | 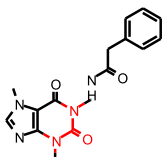<br><chem>[*]N([*])C(=O)N([*])[*]</chem>                | 0.0821 | 13 out of 13             |
| FCFP_12                                | -1539132615 | <br><chem>[*]n1:[*]:[*]:[c]([*]):[c]:1C(=[*])[*]</chem> | 0.0795 | 9 out of 9               |
| FCFP_12                                | -1410049896 | <br><chem>[*]N([*])[c]1:n:[*]:[*]:[c]:1[*]</chem>       | 0.0734 | 5 out of 5               |
| Top Features for negative contribution |             |                                                                                                                                            |        |                          |
| Fingerprint                            | Bit/Smiles  | Feature Structure                                                                                                                          | Score  | Irritant in training set |
| FCFP_12                                | 566058135   | <br><chem>[*]CC(=O)N[*]</chem>                         | -0.367 | 13 out of 21             |
| FCFP_12                                | 675769755   | <br><chem>[*]C(=[*])N(C)[c]([*]):[*]</chem>           | -0.088 | 15 out of 18             |

|         |            |                                                                                                                                |         |                |
|---------|------------|--------------------------------------------------------------------------------------------------------------------------------|---------|----------------|
| FCFP_12 | 1618154665 | 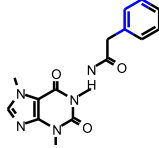<br><chem>[*][c](:[*]):[cH]:[cH] [*]</chem> | -0.0845 | 412 out of 490 |
|---------|------------|--------------------------------------------------------------------------------------------------------------------------------|---------|----------------|

# Erlotinib

# TOPKAT\_Skin\_Irritancy\_None\_vs\_Irritant

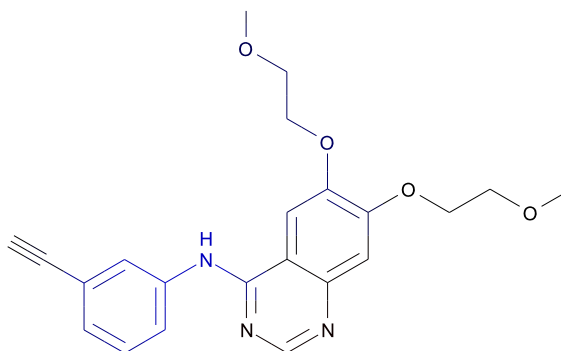

C<sub>22</sub>H<sub>23</sub>N<sub>3</sub>O<sub>4</sub>

Molecular Weight: 393.43572

ALogP: 4.309

Rotatable Bonds: 10

Acceptors: 7

Donors: 1

## Model Prediction

Prediction: Non-Irritant

Probability: 0.119

Enrichment: 0.13

Bayesian Score: -5.76

Mahalanobis Distance: 10.2

Mahalanobis Distance p-value: 0.0333

Prediction: Positive if the Bayesian score is above the estimated best cutoff value from minimizing the false positive and false negative rate.

Probability: The estimated probability that the sample is in the positive category. This assumes that the Bayesian score follows a normal distribution and is different from the prediction using a cutoff.

Enrichment: An estimate of enrichment, that is, the increased likelihood (versus random) of this sample being in the category.

Bayesian Score: The standard Laplacian-modified Bayesian score.

Mahalanobis Distance: The Mahalanobis distance (MD) is the distance to the center of the training data. The larger the MD, the less trustworthy the prediction.

Mahalanobis Distance p-value: The p-value gives the fraction of training data with an MD greater than or equal to the one for the given sample, assuming normally distributed data. The smaller the p-value, the less trustworthy the prediction. For highly non-normal X properties (e.g., fingerprints), the MD p-value is wildly inaccurate.

## Structural Similar Compounds

| Name               | Propanoic acid, 2-(4-((5-(trifluoromethyl)-2-pyridinyl)oxy)phenoxy)-, butyl ester                                                                                                                         | Carbamic acid, ((dibutylamino)thio)methyl-, 2,2-dimethyl-2,3-dihydro-7-benzofuranyl ester                                                                                      | 1,4-Pentadien-3-one, 1,5-bis(p-azidophenyl)-                                                                                                      |
|--------------------|-----------------------------------------------------------------------------------------------------------------------------------------------------------------------------------------------------------|--------------------------------------------------------------------------------------------------------------------------------------------------------------------------------|---------------------------------------------------------------------------------------------------------------------------------------------------|
| Structure          |                                                                                                                                                                                                           |                                                                                                                                                                                |                                                                                                                                                   |
| Actual Endpoint    | Irritant                                                                                                                                                                                                  | Irritant                                                                                                                                                                       | Irritant                                                                                                                                          |
| Predicted Endpoint | Irritant                                                                                                                                                                                                  | Irritant                                                                                                                                                                       | Irritant                                                                                                                                          |
| Distance           | 0.776                                                                                                                                                                                                     | 0.777                                                                                                                                                                          | 0.803                                                                                                                                             |
| Reference          | NNGADV Nippon Noyaku Gakkaishi. Journal of the Pesticide Science Society of Japan. (Nippon Noyaku Gakkai, 1-43-11, Komagome, Toshima-ku, Tokyo 170, Japan) V.1-1976- Volume(issue)/page/year: 15,305,1990 | NTIS** National Technical Information Service. (Springfield, VA 22161) Formerly U.S. Clearinghouse for Scientific & Technical Information. Volume(issue)/page/year: OTS0539690 | 85JCAE "Prehled Prumyslove Toxikologie; Organické Latky," Marhold, J., Prague, Czechoslovakia, Avicenum, 1986 Volume(issue)/page/year: -,733,1986 |

## Model Applicability

Unknown features are fingerprint features in the query molecule, but not found or appearing too infrequently in the training set.

1. All properties and OPS components are within expected ranges.
2. Unknown FCFP\_2 feature: 902193919: [\*]:[c](:[\*])C#C

## Feature Contribution

### Top features for positive contribution

| Fingerprint | Bit/Smiles | Feature Structure | Score | Irritant in training set |
|-------------|------------|-------------------|-------|--------------------------|
|-------------|------------|-------------------|-------|--------------------------|



|                                        |             |                                                                                                                                                                                                 |        |                          |
|----------------------------------------|-------------|-------------------------------------------------------------------------------------------------------------------------------------------------------------------------------------------------|--------|--------------------------|
| FCFP_12                                | -124685461  | 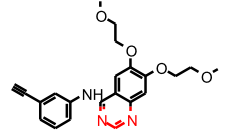<br><chem>[*]n1:[*]:[*]:n:[cH]:</chem>                                                                       | 0.0734 | 5 out of 5               |
| FCFP_12                                | -475316933  | <br><chem>[*][c]1:[*]:[c](:[*])</chem><br><chem>:n:[cH]:n:1</chem>                                           | 0.0703 | 4 out of 4               |
| FCFP_12                                | -1385265413 | <br><chem>[*]:[cH]:[c]1:n:[cH]:</chem><br><chem>n:[*]:[c]:1:[*]</chem>                                       | 0.0658 | 3 out of 3               |
| Top Features for negative contribution |             |                                                                                                                                                                                                 |        |                          |
| Fingerprint                            | Bit/Smiles  | Feature Structure                                                                                                                                                                               | Score  | Irritant in training set |
| FCFP_12                                | 411414971   | <br><chem>[*][c]1:[cH]:[cH]:[cH]:[cH]</chem><br><chem>]:[c](N[c](:[*]):[*])</chem><br><chem>):[cH]:1</chem> | -1.31  | 1 out of 7               |
| FCFP_12                                | -1059904848 | <br><chem>[*][c](:[*]):[c](OCCO</chem><br><chem>C):[cH]:[*]</chem>                                         | -1.04  | 0 out of 2               |

FCFP\_12

839741273

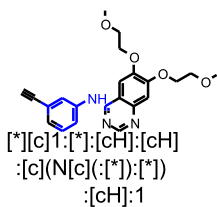

-0.708

4 out of 10

## Compound 5

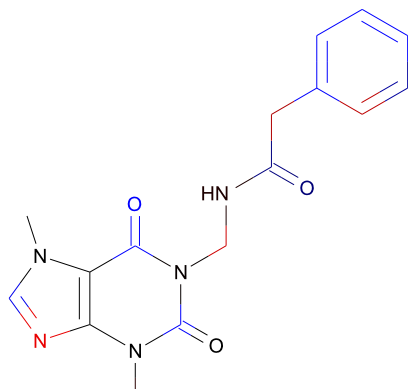

$C_{16}H_{17}N_5O_3$

Molecular Weight: 327.33788

ALogP: 0.773

Rotatable Bonds: 4

Acceptors: 4

Donors: 1

### Model Prediction

Prediction: 70.9

Unit: mg/kg\_body\_weight/day

Mahalanobis Distance: 11

Mahalanobis Distance p-value: 0.00169

Mahalanobis Distance: The Mahalanobis distance (MD) is a generalization of the Euclidean distance that accounts for correlations among the X properties. It is calculated as the distance to the center of the training data. The larger the MD, the less trustworthy the prediction.

Mahalanobis Distance p-value: The p-value gives the fraction of training data with an MD greater than or equal to the one for the given sample, assuming normally distributed data. The smaller the p-value, the less trustworthy the prediction. For highly non-normal X properties (e.g., fingerprints), the MD p-value is wildly inaccurate.

## TOPKAT\_Carcinogenic\_Potency\_TD50\_Mouse

### Structural Similar Compounds

| Name                        | 3-Benzylsydnone-4-acetamide | Ripazepam | 422     |
|-----------------------------|-----------------------------|-----------|---------|
| Structure                   |                             |           |         |
| Actual Endpoint (-log C)    | 4.35917                     | 3.37174   | 3.99565 |
| Predicted Endpoint (-log C) | 3.78539                     | 3.42826   | 3.22211 |
| Distance                    | 0.615                       | 0.628     | 0.654   |
| Reference                   | CPDB                        | CPDB      | CPDB    |

### Model Applicability

Unknown features are fingerprint features in the query molecule, but not found or appearing too infrequently in the training set.

1. All properties and OPS components are within expected ranges.
2. Unknown ECFP\_2 feature: 1135573248: [\*]N([\*])C(=O)N([\*])[\*]
3. Unknown ECFP\_2 feature: -661097313: [\*]CN(C(=[\*])([\*])C(=[\*])[\*])
4. Unknown ECFP\_2 feature: -960717516: [\*]C(=[\*])N(C)[c]([\*]):[\*]
5. Unknown ECFP\_2 feature: -39630146: [\*]NCN([\*])[\*]

### Feature Contribution

#### Top features for positive contribution

| Fingerprint | Bit/Smiles | Feature Structure | Score |
|-------------|------------|-------------------|-------|
| ECFP_6      | 655739385  | <br>[*]:n:[*]     | 0.229 |

|                                        |             |                                                                                                                                  |        |
|----------------------------------------|-------------|----------------------------------------------------------------------------------------------------------------------------------|--------|
| ECFP_6                                 | 1559650422  | 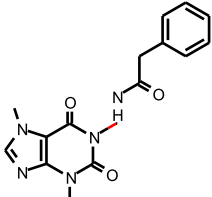<br><chem>[*]C[*]</chem>                      | 0.203  |
| ECFP_6                                 | -2024255407 | <br><chem>[*]C[c](:[cH]:[*]):[cH]:[*]</chem>  | 0.172  |
| Top Features for negative contribution |             |                                                                                                                                  |        |
| Fingerprint                            | Bit/Smiles  | Feature Structure                                                                                                                | Score  |
| ECFP_6                                 | 2106656448  | <br><chem>[*]C(=O)[*]</chem>                  | -0.275 |
| ECFP_6                                 | 1996767644  | <br><chem>[*][c](:[*]):[cH]:[cH]:[*]</chem> | -0.251 |
| ECFP_6                                 | 642810091   | <br><chem>[*]C(=[*])[*]</chem>              | -0.247 |



# Erlotinib

# TOPKAT\_Carcinogenic\_Potency\_TD50\_Mouse

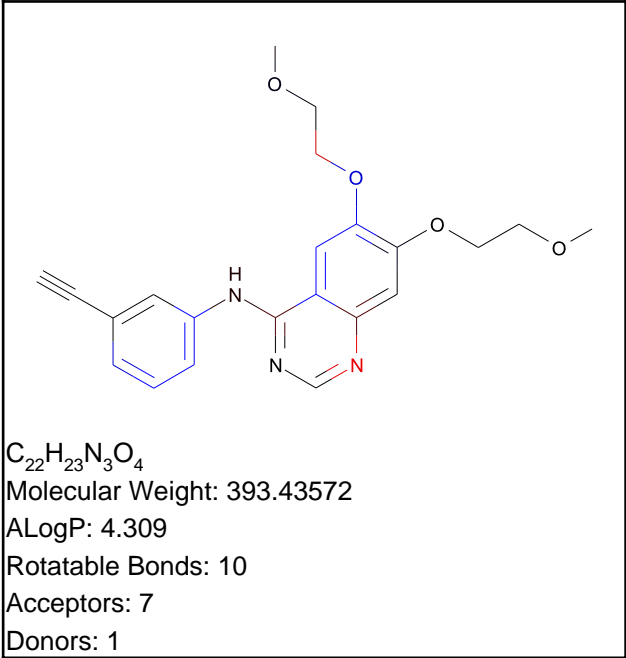

**Model Prediction**  
Prediction: 39.8  
Unit: mg/kg\_body\_weight/day  
Mahalanobis Distance: 16.1  
Mahalanobis Distance p-value: 1.15e-016

Mahalanobis Distance: The Mahalanobis distance (MD) is a generalization of the Euclidean distance that accounts for correlations among the X properties. It is calculated as the distance to the center of the training data. The larger the MD, the less trustworthy the prediction.  
Mahalanobis Distance p-value: The p-value gives the fraction of training data with an MD greater than or equal to the one for the given sample, assuming normally distributed data. The smaller the p-value, the less trustworthy the prediction. For highly non-normal X properties (e.g., fingerprints), the MD p-value is wildly inaccurate.

| Structural Similar Compounds |                   |         |                                                                    |
|------------------------------|-------------------|---------|--------------------------------------------------------------------|
| Name                         | Compound LY171883 | 832     | 5,5'-(1,1'-Biphenyl)-2,5-dyl-bis (oxy)(2,2-dimethylpentanoic acid) |
| Structure                    |                   |         |                                                                    |
| Actual Endpoint (-log C)     | 3.45372           | 3.45372 | 3.90166                                                            |
| Predicted Endpoint (-log C)  | 2.84749           | 2.80429 | 2.75893                                                            |
| Distance                     | 0.772             | 0.782   | 0.796                                                              |
| Reference                    | CPDB              | CPDB    | CPDB                                                               |

**Model Applicability**  
Unknown features are fingerprint features in the query molecule, but not found or appearing too infrequently in the training set.

- 1. OPS PC13 out of range. Value: -3.2209. Training min, max, SD, explained variance: -3.068, 3.6909, 1.329, 0.0220.
- 2. Unknown ECFP\_2 feature: -1253653003: [\*]COC
- 3. Unknown ECFP\_2 feature: -182178874: [\*]#C[c](:c:[\*]):c:[\*]
- 4. Unknown ECFP\_2 feature: 1139738044: [\*]:c(:[\*])C#C

| Feature Contribution                   |            |                   |       |
|----------------------------------------|------------|-------------------|-------|
| Top features for positive contribution |            |                   |       |
| Fingerprint                            | Bit/Smiles | Feature Structure | Score |
| ECFP_6                                 | 655739385  | <br>[*]:n:[*]     | 0.229 |

|                                        |            |                                                                                                                                               |        |
|----------------------------------------|------------|-----------------------------------------------------------------------------------------------------------------------------------------------|--------|
| ECFP_6                                 | 1559650422 | 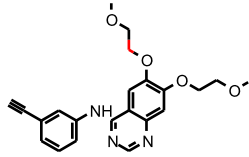<br><chem>[*]C[*]</chem>                                   | 0.203  |
| ECFP_6                                 | 1333660716 | <br><chem>[*][c](:[*]):[c](:[cH]:[*]):[c](:[*]):[*]</chem> | 0.0746 |
| Top Features for negative contribution |            |                                                                                                                                               |        |
| Fingerprint                            | Bit/Smiles | Feature Structure                                                                                                                             | Score  |
| ECFP_6                                 | 1996767644 | <br><chem>[*][c](:[*]):[cH]:[cH]:[*]</chem>                | -0.251 |
| ECFP_6                                 | 642810091  | <br><chem>[*]C(=[*])[*]</chem>                           | -0.247 |
| ECFP_6                                 | 182236392  | <br><chem>[*]:[cH]:[*]</chem>                            | -0.232 |





## Compound 5

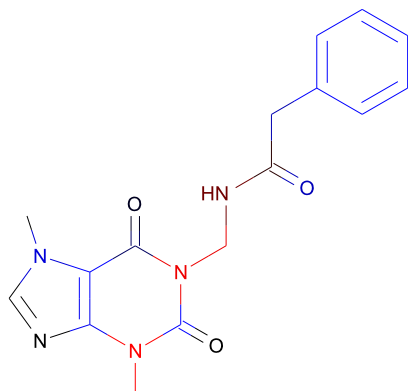

$C_{16}H_{17}N_5O_3$

Molecular Weight: 327.33788

ALogP: 0.773

Rotatable Bonds: 4

Acceptors: 4

Donors: 1

### Model Prediction

Prediction: 55.7

Unit: mg/kg\_body\_weight/day

Mahalanobis Distance: 14.7

Mahalanobis Distance p-value: 2.33e-010

Mahalanobis Distance: The Mahalanobis distance (MD) is a generalization of the Euclidean distance that accounts for correlations among the X properties. It is calculated as the distance to the center of the training data. The larger the MD, the less trustworthy the prediction.

Mahalanobis Distance p-value: The p-value gives the fraction of training data with an MD greater than or equal to the one for the given sample, assuming normally distributed data. The smaller the p-value, the less trustworthy the prediction. For highly non-normal X properties (e.g., fingerprints), the MD p-value is wildly inaccurate.

## TOPKAT\_Carcinogenic\_Potency\_TD50\_Rat

### Structural Similar Compounds

| Name                        | Fluconazole | 4,4'-Sulfonylbisacetanilide | 3-Benzylsydnone-4-acetamide |
|-----------------------------|-------------|-----------------------------|-----------------------------|
| Structure                   |             |                             |                             |
| Actual Endpoint (-log C)    | 3.57923     | 3.77655                     | 4.74041                     |
| Predicted Endpoint (-log C) | 4.1264      | 3.55337                     | 2.85943                     |
| Distance                    | 0.604       | 0.632                       | 0.636                       |
| Reference                   | CPDB        | CPDB                        | CPDB                        |

### Model Applicability

Unknown features are fingerprint features in the query molecule, but not found or appearing too infrequently in the training set.

1. All properties and OPS components are within expected ranges.

### Feature Contribution

| Top features for positive contribution |            |                                |       |
|----------------------------------------|------------|--------------------------------|-------|
| Fingerprint                            | Bit/Smiles | Feature Structure              | Score |
| FCFP_6                                 | 136627117  | <p><chem>[*]N([*])C</chem></p> | 0.69  |

|                                        |             |                                                                                                                                          |        |
|----------------------------------------|-------------|------------------------------------------------------------------------------------------------------------------------------------------|--------|
| FCFP_6                                 | 1           | 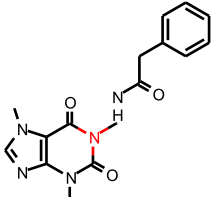<br><chem>[*]N([*])[*]</chem>                         | 0.234  |
| FCFP_6                                 | -885550502  | <br><chem>[*]CNC(=[*])[*]</chem>                      | 0.229  |
| Top Features for negative contribution |             |                                                                                                                                          |        |
| Fingerprint                            | Bit/Smiles  | Feature Structure                                                                                                                        | Score  |
| FCFP_6                                 | 991735244   | <br><chem>[*][c]1:[*]:[cH]:[cH]:[cH]:[cH]:1</chem>    | -0.422 |
| FCFP_6                                 | -2093839777 | <br><chem>[*][c]1:[cH]:[cH]:[cH]:[cH]:[cH]:1</chem> | -0.378 |
| FCFP_6                                 | 16          | <br><chem>[*][c](:[*]):[*]</chem>                   | -0.354 |



# Erlotinib

# TOPKAT\_Carcinogenic\_Potency\_TD50\_Rat

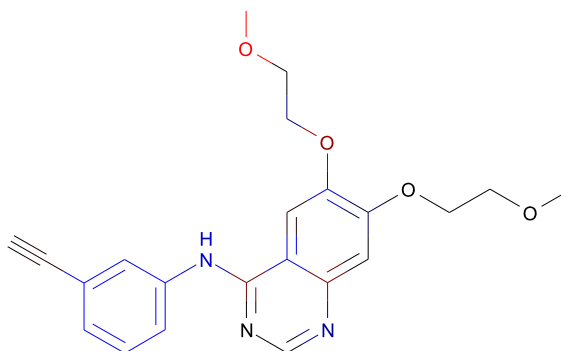

C<sub>22</sub>H<sub>23</sub>N<sub>3</sub>O<sub>4</sub>

Molecular Weight: 393.43572

ALogP: 4.309

Rotatable Bonds: 10

Acceptors: 7

Donors: 1

## Model Prediction

Prediction: 8.06

Unit: mg/kg\_body\_weight/day

Mahalanobis Distance: 17.7

Mahalanobis Distance p-value: 3.99e-020

Mahalanobis Distance: The Mahalanobis distance (MD) is a generalization of the Euclidean distance that accounts for correlations among the X properties. It is calculated as the distance to the center of the training data. The larger the MD, the less trustworthy the prediction.

Mahalanobis Distance p-value: The p-value gives the fraction of training data with an MD greater than or equal to the one for the given sample, assuming normally distributed data. The smaller the p-value, the less trustworthy the prediction. For highly non-normal X properties (e.g., fingerprints), the MD p-value is wildly inaccurate.

## Structural Similar Compounds

| Name                        | Loxidine | C.I. direct brown 95 | Omeprazole |
|-----------------------------|----------|----------------------|------------|
| Structure                   |          |                      |            |
| Actual Endpoint (-log C)    | 2.87532  | 5.31387              | 3.4628     |
| Predicted Endpoint (-log C) | 3.63996  | 4.30266              | 4.7324     |
| Distance                    | 0.685    | 0.715                | 0.741      |
| Reference                   | CPDB     | CPDB                 | CPDB       |

## Model Applicability

Unknown features are fingerprint features in the query molecule, but not found or appearing too infrequently in the training set.

1. All properties and OPS components are within expected ranges.
2. Unknown FCFP\_2 feature: 902193919: [\*]:[c](:[\*])C#C

## Feature Contribution

| Top features for positive contribution |            |                   |       |
|----------------------------------------|------------|-------------------|-------|
| Fingerprint                            | Bit/Smiles | Feature Structure | Score |
| FCFP_6                                 | 136627117  | <p>[*]N([*])C</p> | 0.69  |

|                                        |            |                                                                                                                                       |        |
|----------------------------------------|------------|---------------------------------------------------------------------------------------------------------------------------------------|--------|
| FCFP_6                                 | 1          | 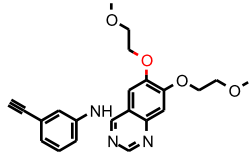<br><chem>[*]N([*])([*])</chem>                    | 0.234  |
| FCFP_6                                 | 203677720  | <br><chem>[*]C[c](:[cH]:[*]):[cH]:[*]</chem>       | 0.137  |
| Top Features for negative contribution |            |                                                                                                                                       |        |
| Fingerprint                            | Bit/Smiles | Feature Structure                                                                                                                     | Score  |
| FCFP_6                                 | 991735244  | <br><chem>[*][c]1:[*]:[cH]:[cH]:[cH]:[cH]:1</chem> | -0.422 |
| FCFP_6                                 | 16         | <br><chem>[*][c](:[*]):[*]</chem>                | -0.354 |
| FCFP_6                                 | 590925877  | <br><chem>[*]N[c](:[cH]:[*]):[cH]:[*]</chem>     | -0.323 |



## Compound 5

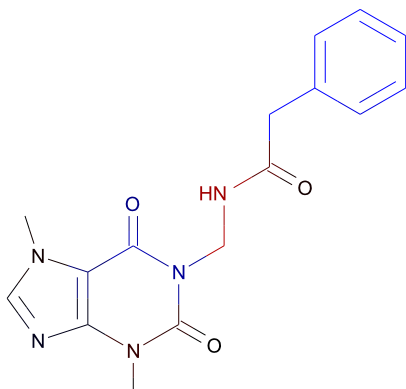

$C_{16}H_{17}N_5O_3$

Molecular Weight: 327.33788

ALogP: 0.773

Rotatable Bonds: 4

Acceptors: 4

Donors: 1

### Model Prediction

Prediction: 0.0392

Unit: g/kg\_body\_weight

Mahalanobis Distance: 30.7

Mahalanobis Distance p-value: 6.86e-026

Mahalanobis Distance: The Mahalanobis distance (MD) is a generalization of the Euclidean distance that accounts for correlations among the X properties. It is calculated as the distance to the center of the training data. The larger the MD, the less trustworthy the prediction.

Mahalanobis Distance p-value: The p-value gives the fraction of training data with an MD greater than or equal to the one for the given sample, assuming normally distributed data. The smaller the p-value, the less trustworthy the prediction. For highly non-normal X properties (e.g., fingerprints), the MD p-value is wildly inaccurate.

## TOPKAT\_Chronic\_LOAEL

### Structural Similar Compounds

| Name                        | PENTOXIFYLLINE | TRIAMPHOS                    | DANTROLENE.NA |
|-----------------------------|----------------|------------------------------|---------------|
| Structure                   |                |                              |               |
| Actual Endpoint (-log C)    | 3.26844        | 6.99166                      | 4.19625       |
| Predicted Endpoint (-log C) | 3.43031        | 4.6967                       | 4.62637       |
| Distance                    | 0.468          | 0.478                        | 0.562         |
| Reference                   | NDA-18534      | RQTOX ECAO CIN R525;8801;(4) | NDA-17443     |

### Model Applicability

Unknown features are fingerprint features in the query molecule, but not found or appearing too infrequently in the training set.

1. All properties and OPS components are within expected ranges.
2. Unknown FCFP\_2 feature: 470101049: [\*]NCN([\*])[\*]
3. Unknown ECFP\_6 feature: 672362763: [\*]n(:[\*]):[\*]
4. Unknown ECFP\_6 feature: 1135573248: [\*]N([\*])C(=O)N([\*])[\*]
5. Unknown ECFP\_6 feature: -661097313: [\*]CN(C(=[\*])([\*])C(=[\*])[\*])
6. Unknown ECFP\_6 feature: 1945129186: [\*]N([\*])C(=O)[c](:[\*]):[\*]
7. Unknown ECFP\_6 feature: -813242890: [\*]n1:[\*]:[\*]:[c]([\*]):[c]:1C(=[\*])[\*]
8. Unknown ECFP\_6 feature: -509950643: [\*]N([\*])[c]1:n:[\*]:[\*]:[c]:1[\*]
9. Unknown ECFP\_6 feature: -960717516: [\*]C(=[\*])N(C)[c]([\*]):[\*]
10. Unknown ECFP\_6 feature: -407983022: [\*][c]1:[\*]:[\*]:[cH]:n:1C
11. Unknown ECFP\_6 feature: -708878603: [\*]n1:[\*]:[\*]:n:[cH]:1
12. Unknown ECFP\_6 feature: -677309799: [\*][c]1:[\*]:[\*]:[cH]:n:1
13. Unknown ECFP\_6 feature: 866343404: [\*]N([\*])C
14. Unknown ECFP\_6 feature: 866450950: [\*]:n(:[\*])C
15. Unknown ECFP\_6 feature: -39630146: [\*]NCN([\*])[\*]
16. Unknown ECFP\_6 feature: 497523368: [\*]CNC(=[\*])[\*]
17. Unknown ECFP\_6 feature: 1731843802: [\*]CC(=O)N[\*]
18. Unknown ECFP\_6 feature: 771857573: [\*]C(=[\*])C[c]([\*]):[\*]
19. Unknown ECFP\_6 feature: 1997021792: [\*]:[cH]:[cH]:[cH]:[\*]

## Feature Contribution

| Top features for positive contribution |             |                                                                                                                                         |        |
|----------------------------------------|-------------|-----------------------------------------------------------------------------------------------------------------------------------------|--------|
| Fingerprint                            | Bit/Smiles  | Feature Structure                                                                                                                       | Score  |
| ECFP_6                                 | 1559650422  | 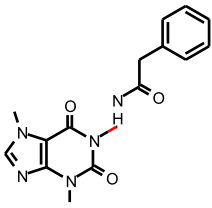<br><chem>[*]C[*]</chem>                             | 0.129  |
| FCFP_6                                 | 3           | <br><chem>[*]N[*]</chem>                             | 0.0924 |
| FCFP_6                                 | -2093839777 | <br><chem>[*][c]1:[cH]:[cH]:[cH]:[cH]:[cH]:1</chem>  | 0.078  |
| Top Features for negative contribution |             |                                                                                                                                         |        |
| Fingerprint                            | Bit/Smiles  | Feature Structure                                                                                                                       | Score  |
| FCFP_6                                 | 991735244   | <br><chem>[*][c]1:[*]:[cH]:[cH]:[cH]:[cH]:1</chem> | -0.134 |
|                                        |             |                                                                                                                                         |        |



|        |            |                                                                                                                              |        |
|--------|------------|------------------------------------------------------------------------------------------------------------------------------|--------|
| ECFP_6 | 1564392544 | 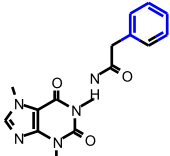<br>[*][c]1:[*]:[cH]:[cH]<br>:[cH]:[cH]:1 | -0.133 |
| ECFP_6 | 2106656448 | <br>[*]C(=O)[*]                           | -0.11  |

# Erlotinib

# TOPKAT\_Chronic\_LOAEL

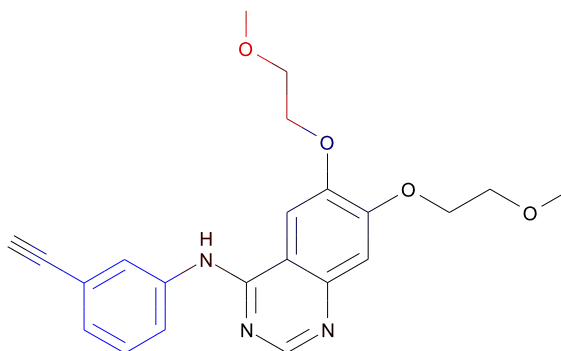

$C_{22}H_{23}N_3O_4$   
 Molecular Weight: 393.43572  
 ALogP: 4.309  
 Rotatable Bonds: 10  
 Acceptors: 7  
 Donors: 1

## Model Prediction

Prediction: 0.0359  
 Unit: g/kg\_body\_weight  
 Mahalanobis Distance: 34.8  
 Mahalanobis Distance p-value: 2.91e-033

Mahalanobis Distance: The Mahalanobis distance (MD) is a generalization of the Euclidean distance that accounts for correlations among the X properties. It is calculated as the distance to the center of the training data. The larger the MD, the less trustworthy the prediction.  
 Mahalanobis Distance p-value: The p-value gives the fraction of training data with an MD greater than or equal to the one for the given sample, assuming normally distributed data. The smaller the p-value, the less trustworthy the prediction. For highly non-normal X properties (e.g., fingerprints), the MD p-value is wildly inaccurate.

## Structural Similar Compounds

| Name                        | ASSURE                          | DILTIAZEM | RHODAMINE 6G |
|-----------------------------|---------------------------------|-----------|--------------|
| Structure                   |                                 |           |              |
| Actual Endpoint (-log C)    | 5.00328                         | 4.21961   | 4.54906      |
| Predicted Endpoint (-log C) | 4.27671                         | 4.005     | 4.6787       |
| Distance                    | 0.611                           | 0.676     | 0.689        |
| Reference                   | EPA COVER SHEET 0335;891001;(1) | NDA-18602 | NTP 364 39   |

## Model Applicability

Unknown features are fingerprint features in the query molecule, but not found or appearing too infrequently in the training set.

1. All properties and OPS components are within expected ranges.
2. Unknown FCFP\_2 feature: 902193919: [\*]:[c]([\*])C#C
3. Unknown FCFP\_2 feature: 131784192: [\*]C#C
4. Unknown ECFP\_6 feature: -1114776580: [\*]C#[\*]
5. Unknown ECFP\_6 feature: -1939823063: [\*]#C
6. Unknown ECFP\_6 feature: -1255706725: [\*]CO[c]([\*]):[\*]
7. Unknown ECFP\_6 feature: -1253653003: [\*]COC
8. Unknown ECFP\_6 feature: -1242906247: [\*]:[c]([\*])N[c]([\*]):[\*]
9. Unknown ECFP\_6 feature: -677309799: [\*][c]1:[\*]:[\*]:[cH]:n:1
10. Unknown ECFP\_6 feature: 1333660716: [\*][c]([\*]):[c]([\*]):[cH]:[\*]:[c]([\*]):[\*]
11. Unknown ECFP\_6 feature: 1410041175: [\*]:[cH]:[c]([\*]):[c]([\*]):[\*]
12. Unknown ECFP\_6 feature: 1049768340: [\*]N[c]([\*]):[c]([\*]):[\*]
13. Unknown ECFP\_6 feature: -1790412586: [\*]CCO[\*]
14. Unknown ECFP\_6 feature: -177077903: [\*]N[c]([\*]):[cH]:[\*]:[cH]:[\*]
15. Unknown ECFP\_6 feature: -710237522: [\*]:n:[cH]:n:[\*]
16. Unknown ECFP\_6 feature: -182178874: [\*]#C[c]([\*]):[cH]:[\*]:[cH]:[\*]
17. Unknown ECFP\_6 feature: 1997021792: [\*]:[cH]:[cH]:[cH]:[\*]
18. Unknown ECFP\_6 feature: 1139738044: [\*]:[c]([\*])C#C
19. Unknown ECFP\_6 feature: -1545539812: [\*]C#C

## Feature Contribution

| Top features for positive contribution |            |                                                                                                                                |        |
|----------------------------------------|------------|--------------------------------------------------------------------------------------------------------------------------------|--------|
| Fingerprint                            | Bit/Smiles | Feature Structure                                                                                                              | Score  |
| FCFP_6                                 | 1143715940 | 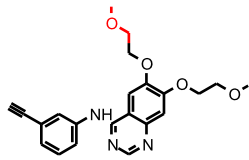<br>[*]COC                                  | 0.13   |
| ECFP_6                                 | 1559650422 | <br>[*]C[*]                                 | 0.129  |
| FCFP_6                                 | 3          | <br>[*]N[*]                                 | 0.0924 |
| Top Features for negative contribution |            |                                                                                                                                |        |
| Fingerprint                            | Bit/Smiles | Feature Structure                                                                                                              | Score  |
| FCFP_6                                 | 991735244  | <br>[*][c]1:[*]:[cH]:[cH]<br>:[cH]:[cH]:1 | -0.134 |
|                                        |            |                                                                                                                                |        |

|        |            |                                                                                                                           |         |
|--------|------------|---------------------------------------------------------------------------------------------------------------------------|---------|
| FCFP_6 | 1          | 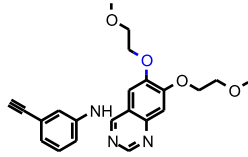<br>[*]N([*])[*]                       | -0.102  |
| FCFP_6 | -453677277 | <br>[*]C[c]1:[cH]:[*]:[cH]:[cH]:[cH]:1 | -0.0906 |

## Compound 5

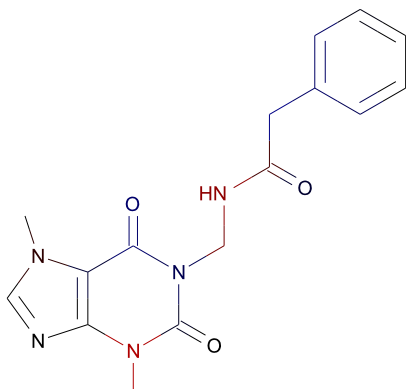

$C_{16}H_{17}N_5O_3$

Molecular Weight: 327.33788

ALogP: 0.773

Rotatable Bonds: 4

Acceptors: 4

Donors: 1

### Model Prediction

Prediction: 0.0245

Unit: g/kg\_body\_weight

Mahalanobis Distance: 7.87

Mahalanobis Distance p-value: 0.0332

Mahalanobis Distance: The Mahalanobis distance (MD) is a generalization of the Euclidean distance that accounts for correlations among the X properties. It is calculated as the distance to the center of the training data. The larger the MD, the less trustworthy the prediction.

Mahalanobis Distance p-value: The p-value gives the fraction of training data with an MD greater than or equal to the one for the given sample, assuming normally distributed data. The smaller the p-value, the less trustworthy the prediction. For highly non-normal X properties (e.g., fingerprints), the MD p-value is wildly inaccurate.

## TOPKAT\_Rat\_Maximum\_Tolerated\_Dose\_Feed

### Structural Similar Compounds

| Name                        | BENZIDINE,3,3'-DIMETHOXY-    | NALIXIC ACID   | 3-NITRO-P-ACETOPHENETIDE |
|-----------------------------|------------------------------|----------------|--------------------------|
| Structure                   |                              |                |                          |
| Actual Endpoint (-log C)    | 4.06569                      | 3.15109        | 3.11767                  |
| Predicted Endpoint (-log C) | 3.57405                      | 2.99623        | 3.42808                  |
| Distance                    | 0.633                        | 0.638          | 0.641                    |
| Reference                   | NCI/NTP Report 10, Nov. 1987 | NCI/NTP TR-368 | NCI/NTP TR-133           |

### Model Applicability

Unknown features are fingerprint features in the query molecule, but not found or appearing too infrequently in the training set.

1. All properties and OPS components are within expected ranges.
2. Unknown FCFP\_2 feature: -306856457: [\*][c]1:[\*]:[\*]:[cH]:n:1C
3. Unknown FCFP\_2 feature: -124685461: [\*]n1:[\*]:[\*]:n:[cH]:1
4. Unknown FCFP\_2 feature: 136150461: [\*]:n(:[\*])C
5. Unknown FCFP\_2 feature: 470101049: [\*]NCN([\*])[\*]

### Feature Contribution

| Top features for positive contribution |            |                   |       |
|----------------------------------------|------------|-------------------|-------|
| Fingerprint                            | Bit/Smiles | Feature Structure | Score |
| FCFP_2                                 | 136627117  | <br>[*]N([*])C    | 0.173 |

|                                        |            |                                                                                                                                   |         |
|----------------------------------------|------------|-----------------------------------------------------------------------------------------------------------------------------------|---------|
| FCFP_2                                 | -885550502 | 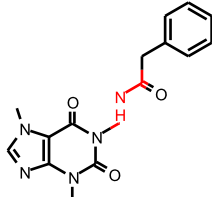<br><chem>[*]CNC(=[*])[*]</chem>               | 0.115   |
| FCFP_2                                 | 3          | <br><chem>[*]N[*]</chem>                       | 0.0737  |
| Top Features for negative contribution |            |                                                                                                                                   |         |
| Fingerprint                            | Bit/Smiles | Feature Structure                                                                                                                 | Score   |
| FCFP_2                                 | 1872154524 | <br><chem>[*]C(=O)[*]</chem>                   | -0.105  |
| FCFP_2                                 | 203677720  | <br><chem>[*]C[c](:[cH]:[*]):[cH]:[*]</chem> | -0.0829 |
| FCFP_2                                 | 1          | <br><chem>[*]N([*])[*]</chem>                | -0.0796 |



# Erlotinib

# TOPKAT\_Rat\_Maximum\_Tolerated\_Dose\_Feed

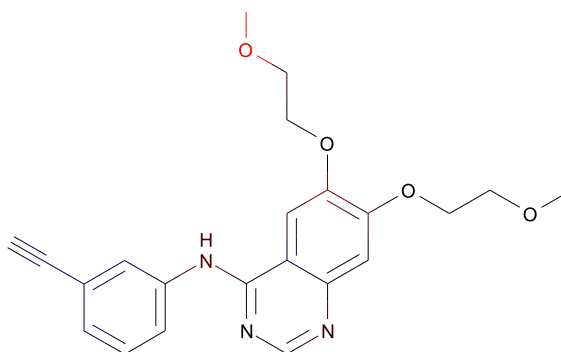

$C_{22}H_{23}N_3O_4$

Molecular Weight: 393.43572

ALogP: 4.309

Rotatable Bonds: 10

Acceptors: 7

Donors: 1

## Model Prediction

Prediction: 0.0828

Unit: g/kg\_body\_weight

Mahalanobis Distance: 9.37

Mahalanobis Distance p-value: 0.000417

Mahalanobis Distance: The Mahalanobis distance (MD) is a generalization of the Euclidean distance that accounts for correlations among the X properties. It is calculated as the distance to the center of the training data. The larger the MD, the less trustworthy the prediction.

Mahalanobis Distance p-value: The p-value gives the fraction of training data with an MD greater than or equal to the one for the given sample, assuming normally distributed data. The smaller the p-value, the less trustworthy the prediction. For highly non-normal X properties (e.g., fingerprints), the MD p-value is wildly inaccurate.

## Structural Similar Compounds

| Name                        | BUTYL BENZYL PHTHALATE | 3,3'-DIMETHOXYBENZIDINE-4,4'-DIISOCYANATE | PYRILAMINE                   |
|-----------------------------|------------------------|-------------------------------------------|------------------------------|
| Structure                   |                        |                                           |                              |
| Actual Endpoint (-log C)    | 2.79569                | 2.17504                                   | 3.32511                      |
| Predicted Endpoint (-log C) | 3.18498                | 3.78717                                   | 3.65163                      |
| Distance                    | 0.758                  | 0.795                                     | 0.820                        |
| Reference                   | NCI/NTP TR-458         | NCI/NTP TR-128                            | NCI/NTP Report 10, Nov. 1987 |

## Model Applicability

Unknown features are fingerprint features in the query molecule, but not found or appearing too infrequently in the training set.

1. All properties and OPS components are within expected ranges.
2. Unknown FCFP\_2 feature: -124685461: [\*]n1:[\*]:[\*]:n:[cH]:1
3. Unknown FCFP\_2 feature: 902193919: [\*]:[c](:[\*])C#C
4. Unknown FCFP\_2 feature: 131784192: [\*]C#C

## Feature Contribution

| Top features for positive contribution |            |                   |       |
|----------------------------------------|------------|-------------------|-------|
| Fingerprint                            | Bit/Smiles | Feature Structure | Score |
| FCFP_2                                 | 136627117  | <br>[*]N([*])C    | 0.173 |



|                                        |             |                                                                                                                        |         |
|----------------------------------------|-------------|------------------------------------------------------------------------------------------------------------------------|---------|
| FCFP_2                                 | -1143715940 | 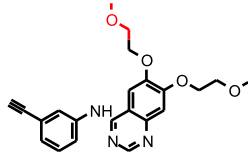<br>[*]COC                          | 0.095   |
| FCFP_2                                 | 1036089772  | <br>[*]CO[c](:[*]):[*]              | 0.0749  |
| Top Features for negative contribution |             |                                                                                                                        |         |
| Fingerprint                            | Bit/Smiles  | Feature Structure                                                                                                      | Score   |
| FCFP_2                                 | 203677720   | <br>[*]C[c](:[cH]:[*]):[c<br>H]:[*] | -0.0829 |
| FCFP_2                                 | 1           | <br>[*]N([*])[*]                  | -0.0796 |
| FCFP_2                                 | 16          | <br>[*][c](:[*]):[*]              | -0.0512 |



## Compound 5

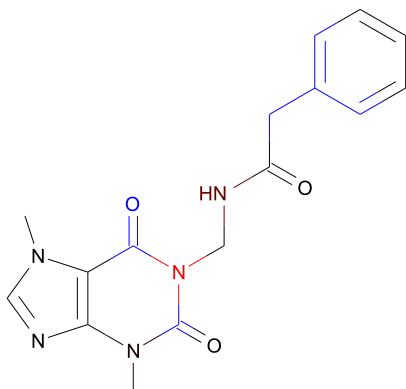

C<sub>16</sub>H<sub>17</sub>N<sub>5</sub>O<sub>3</sub>

Molecular Weight: 327.33788

ALogP: 0.773

Rotatable Bonds: 4

Acceptors: 4

Donors: 1

### Model Prediction

Prediction: 0.2

Unit: g/kg\_body\_weight

Mahalanobis Distance: 8

Mahalanobis Distance p-value: 0.00209

Mahalanobis Distance: The Mahalanobis distance (MD) is a generalization of the Euclidean distance that accounts for correlations among the X properties. It is calculated as the distance to the center of the training data. The larger the MD, the less trustworthy the prediction.

Mahalanobis Distance p-value: The p-value gives the fraction of training data with an MD greater than or equal to the one for the given sample, assuming normally distributed data. The smaller the p-value, the less trustworthy the prediction. For highly non-normal X properties (e.g., fingerprints), the MD p-value is wildly inaccurate.

## TOPKAT\_Rat\_Maximum\_Tolerated\_Dose\_Gavage

### Structural Similar Compounds

| Name                        | SULFISOOXAZOLE | PROBENECID     | PENICILLIN VK  |
|-----------------------------|----------------|----------------|----------------|
| Structure                   |                |                |                |
| Actual Endpoint (-log C)    | 2.82494        | 2.85333        | 2.54455        |
| Predicted Endpoint (-log C) | 3.0705         | 2.4258         | 3.9702         |
| Distance                    | 0.672          | 0.780          | 0.846          |
| Reference                   | NCI/NTP TR-138 | NCI/NTP TR-395 | NCI/NTP TR-336 |

### Model Applicability

Unknown features are fingerprint features in the query molecule, but not found or appearing too infrequently in the training set.

1. All properties and OPS components are within expected ranges.
2. Unknown FCFP\_2 feature: -1986158408: [\*]N([\*])C(=O)N([\*])[\*]
3. Unknown FCFP\_2 feature: -1410049896: [\*]N([\*])[c]1:n:[\*]:[\*]:[c]:1[\*]
4. Unknown FCFP\_2 feature: -306856457: [\*][c]1:[\*]:[\*]:[cH]:n:1C
5. Unknown FCFP\_2 feature: -124685461: [\*]n1:[\*]:[\*]:n:[cH]:1
6. Unknown FCFP\_2 feature: 136150461: [\*]:n(:[\*])C
7. Unknown FCFP\_2 feature: 470101049: [\*]NCN([\*])[\*]

### Feature Contribution

#### Top features for positive contribution

| Fingerprint | Bit/Smiles | Feature Structure | Score |
|-------------|------------|-------------------|-------|
|             |            |                   |       |

|                                        |            |                                                                                                                      |        |
|----------------------------------------|------------|----------------------------------------------------------------------------------------------------------------------|--------|
| FCFP_2                                 | 1          | 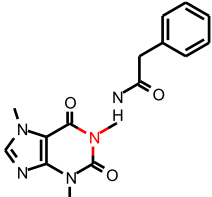<br>[*]N([*])[*]                  | 0.511  |
| FCFP_2                                 | 3          | <br>[*]N[*]                       | 0.104  |
| FCFP_2                                 | 136627117  | <br>[*]N([*])C                    | 0.0304 |
| Top Features for negative contribution |            |                                                                                                                      |        |
| Fingerprint                            | Bit/Smiles | Feature Structure                                                                                                    | Score  |
| FCFP_2                                 | 203677720  | <br>[*]C[c](:[cH]:[*]):[cH]:[*] | -0.406 |
| FCFP_2                                 | 1872154524 | <br>[*]C(=O)[*]                 | -0.307 |

|        |   |                                                                                                                                                                                                                                                                                                                                                                                                                                                                                                                 |       |
|--------|---|-----------------------------------------------------------------------------------------------------------------------------------------------------------------------------------------------------------------------------------------------------------------------------------------------------------------------------------------------------------------------------------------------------------------------------------------------------------------------------------------------------------------|-------|
| FCFP_2 | 0 | 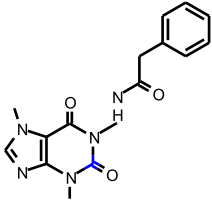 <p>Chemical structure of 1-methyl-3-oxo-1,2,3,4-tetrahydro-1H-imidazo[4,5-b]pyridine-5-carboxamide N-phenyl-L-alanine. The structure features a fused imidazopyridine ring system with a methyl group on the nitrogen at position 1, a carbonyl group at position 3, and a carboxamide group at position 5. The carboxamide group is further substituted with a phenyl ring and a chiral center (L-alanine derivative).</p> | -0.29 |
|--------|---|-----------------------------------------------------------------------------------------------------------------------------------------------------------------------------------------------------------------------------------------------------------------------------------------------------------------------------------------------------------------------------------------------------------------------------------------------------------------------------------------------------------------|-------|

[\*]C(=[\*])[\*]

# Erlotinib

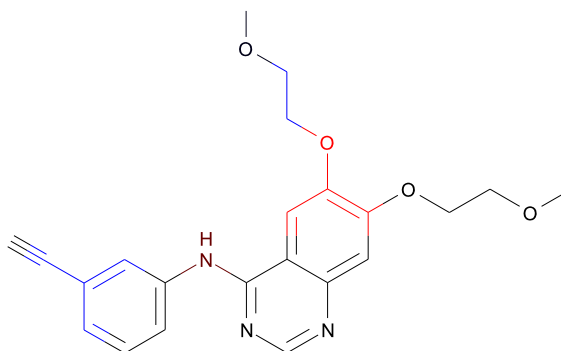
$$\text{C}_{22}\text{H}_{23}\text{N}_3\text{O}_4$$

Molecular Weight: 393.43572

|ALogP: 4.309

Rotatable Bonds: 10

Acceptors: 7

Donors: 1

## Model Prediction

Prediction: 0.000344

Unit: g/kg\_body\_weight

Mahalanobis Distance: 11.7

Mahalanobis Distance p-value: 2.74e-008

**Mahalanobis Distance:** The Mahalanobis distance (MD) is a generalization of the Euclidean distance that accounts for correlations among the X properties. It is calculated as the distance to the center of the training data. The larger the MD, the less trustworthy the prediction.

Mahalanobis Distance p-value: The p-value gives the fraction of training data with an MD greater than or equal to the one for the given sample, assuming normally distributed data. The smaller the p-value, the less trustworthy the prediction. For highly non-normal X properties (e.g., fingerprints), the MD p-value is wildly inaccurate.

## TOPKAT\_Rat\_Maximum\_Tolerated\_Dose\_Gavage

## Structural Similar Compounds

| Name                        | Diallyl PHTHALATE                                                                   | OCHRATOXIN                                                                          | PROBENECID                                                                          |
|-----------------------------|-------------------------------------------------------------------------------------|-------------------------------------------------------------------------------------|-------------------------------------------------------------------------------------|
| Structure                   | 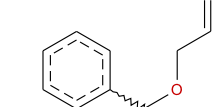 |  |  |
| Actual Endpoint (-log C)    | 3.3914                                                                              | 6.28396                                                                             | 2.85333                                                                             |
| Predicted Endpoint (-log C) | 3.50093                                                                             | 5.12358                                                                             | 2.4258                                                                              |
| Distance                    | 1.113                                                                               | 1.136                                                                               | 1.152                                                                               |
| Reference                   | NCI/NTP TR-284                                                                      | NCI/NTP TR-358                                                                      | NCI/NTP TR-395                                                                      |

## Model Applicability

Unknown features are fingerprint features in the query molecule, but not found or appearing too infrequently in the training set.

1. Num\_H\_Acceptors out of range. Value: 7. Training min, max, mean, SD: 0, 6, 1.6146, 1.644.
2. Num\_AromaticRings out of range. Value: 3. Training min, max, mean, SD: 0, 2, 0.5625, 0.693.
3. OPS\_PC6 out of range. Value: -3.0997. Training min, max, SD, explained variance: -2.4321, 2.9885, 1.256, 0.0488.
4. Unknown FCFP\_2 feature: 1293778554: [\*]:[c](:[\*])N[c](:[\*]):[\*]
5. Unknown FCFP\_2 feature: -124685461: [\*]n1:[\*]:[\*]:n:[cH]:1
6. Unknown FCFP\_2 feature: 902193919: [\*]:[c](:[\*])C#C
7. Unknown FCFP\_2 feature: 131784192: [\*]C#C

## Feature Contribution

## Top features for positive contribution

| Fingerprint | Bit/Smiles | Feature Structure | Score |
|-------------|------------|-------------------|-------|
|             |            |                   |       |

|                                        |            |                                                                                                                                     |        |
|----------------------------------------|------------|-------------------------------------------------------------------------------------------------------------------------------------|--------|
| FCFP_2                                 | 332760439  | 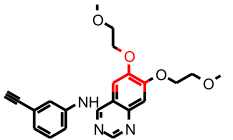<br><chem>[*]O[c](-[cH]:[*]):[c]([*]):[*]</chem> | 0.672  |
| FCFP_2                                 | 1          | <br><chem>[*]N([*])[*]</chem>                    | 0.511  |
| FCFP_2                                 | 3          | <br><chem>[*]N[*]</chem>                         | 0.104  |
| Top Features for negative contribution |            |                                                                                                                                     |        |
| Fingerprint                            | Bit/Smiles | Feature Structure                                                                                                                   | Score  |
| FCFP_2                                 | 203677720  | <br><chem>[*]C[c](-[cH]:[*]):[c]H:[*]</chem>   | -0.406 |
| FCFP_2                                 | 0          | <br><chem>[*]C(=[*])[*]</chem>                 | -0.29  |

|        |             |                                                                                                               |        |
|--------|-------------|---------------------------------------------------------------------------------------------------------------|--------|
| FCFP_2 | -1272768868 | 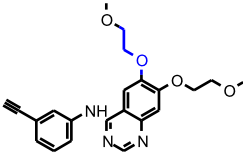<br><chem>[*]CCO[*]</chem> | -0.271 |
|--------|-------------|---------------------------------------------------------------------------------------------------------------|--------|



# Compound 5

TOPKAT\_Rat\_Oral\_LD50

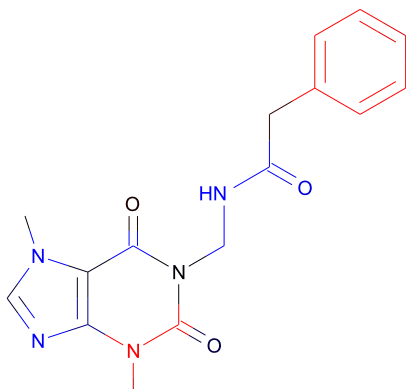

C<sub>16</sub>H<sub>17</sub>N<sub>5</sub>O<sub>3</sub>

Molecular Weight: 327.33788

ALogP: 0.773

Rotatable Bonds: 4

Acceptors: 4

Donors: 1

## Model Prediction

Prediction: 1.58

Unit: g/kg\_body\_weight

Mahalanobis Distance: 21.8

Mahalanobis Distance p-value: 1.21e-015

Mahalanobis Distance: The Mahalanobis distance (MD) is a generalization of the Euclidean distance that accounts for correlations among the X properties. It is calculated as the distance to the center of the training data. The larger the MD, the less trustworthy the prediction.

Mahalanobis Distance p-value: The p-value gives the fraction of training data with an MD greater than or equal to the one for the given sample, assuming normally distributed data. The smaller the p-value, the less trustworthy the prediction. For highly non-normal X properties (e.g., fingerprints), the MD p-value is wildly inaccurate.

## Structural Similar Compounds

| Name                        | PENTOXIFYLLINE | NITRAZEPAM       | PROXYPHYLLINE    |
|-----------------------------|----------------|------------------|------------------|
| Structure                   |                |                  |                  |
| Actual Endpoint (-log C)    | 2.376          | 2.533            | 2.714            |
| Predicted Endpoint (-log C) | 2.23193        | 1.97908          | 2.38533          |
| Distance                    | 0.527          | 0.571            | 0.576            |
| Reference                   | YACHDS 9;13;81 | TXAPA9 18;185;71 | OYYAA2 19;845;80 |

## Model Applicability

Unknown features are fingerprint features in the query molecule, but not found or appearing too infrequently in the training set.

1. All properties and OPS components are within expected ranges.
2. Unknown ECFP\_2 feature: -39630146: [\*]NCN([\*])[\*]
3. Unknown FCFP\_6 feature: 16: [\*][c](:[\*]):[\*]
4. Unknown FCFP\_6 feature: -1410049896: [\*]N([\*])[c]1:n:[\*]:[\*]:[c]:1[\*]
5. Unknown FCFP\_6 feature: -306856457: [\*][c]1:[\*]:[\*]:[cH]:n:1C
6. Unknown FCFP\_6 feature: -124685461: [\*]n1:[\*]:[\*]:n:[cH]:1
7. Unknown FCFP\_6 feature: 1747237384: [\*][c]1:[\*]:[\*]:[cH]:n:1
8. Unknown FCFP\_6 feature: 136150461: [\*]:n(:[\*])C
9. Unknown FCFP\_6 feature: 470101049: [\*]NCN([\*])[\*]
10. Unknown FCFP\_6 feature: 1618154665: [\*][c](:[\*]):[cH]:[cH]:[\*]

## Feature Contribution

### Top features for positive contribution

| Fingerprint | Bit/Smiles | Feature Structure | Score |
|-------------|------------|-------------------|-------|
|             |            |                   |       |

| ECFP_6                                 | 642810091   | 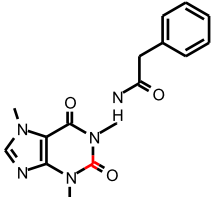<br><chem>[*]C(=[*])[*]</chem>                   | 0.281  |
|----------------------------------------|-------------|-------------------------------------------------------------------------------------------------------------------------------------|--------|
| ECFP_6                                 | -1897341097 | <br><chem>[*]N[*]</chem>                         | 0.216  |
| ECFP_6                                 | 1571214559  | <br><chem>[*]1:[cH]:[cH]:[cH]:[cH]:[cH]:1</chem> | 0.19   |
| Top Features for negative contribution |             |                                                                                                                                     |        |
| Fingerprint                            | Bit/Smiles  | Feature Structure                                                                                                                   | Score  |
| ECFP_6                                 | 2106656448  | <br><chem>[*]C(=O)[*]</chem>                    | -0.352 |
| ECFP_6                                 | 497523368   | <br><chem>[*]CNC(=[*])[*]</chem>               | -0.301 |

|        |           |                                                                                                                                                                  |        |
|--------|-----------|------------------------------------------------------------------------------------------------------------------------------------------------------------------|--------|
| ECFP_6 | 655739385 | 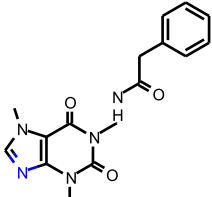<br><chem>CN1C=NC2=C1C(=O)N(C)C(=O)N2C(=O)NC(=O)Cc3ccccc3</chem><br>[*]:n:[*] | -0.239 |
|--------|-----------|------------------------------------------------------------------------------------------------------------------------------------------------------------------|--------|

# Erlotinib

TOPKAT\_Rat\_Oral\_LD50

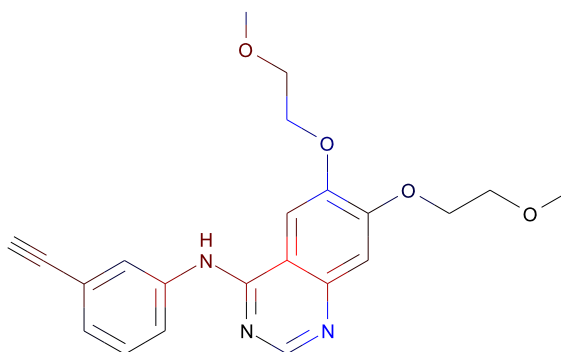

$C_{22}H_{23}N_3O_4$

Molecular Weight: 393.43572

ALogP: 4.309

Rotatable Bonds: 10

Acceptors: 7

Donors: 1

## Model Prediction

Prediction: 0.662

Unit: g/kg\_body\_weight

Mahalanobis Distance: 20.8

Mahalanobis Distance p-value: 9.57e-012

Mahalanobis Distance: The Mahalanobis distance (MD) is a generalization of the Euclidean distance that accounts for correlations among the X properties. It is calculated as the distance to the center of the training data. The larger the MD, the less trustworthy the prediction.

Mahalanobis Distance p-value: The p-value gives the fraction of training data with an MD greater than or equal to the one for the given sample, assuming normally distributed data. The smaller the p-value, the less trustworthy the prediction. For highly non-normal X properties (e.g., fingerprints), the MD p-value is wildly inaccurate.

## Structural Similar Compounds

| Name                        | TALNIFLUMATE     | 3-QUINOLINECARBOXYLIC ACID; 6;7-bis-(CYCLOPROPYLMETHOXY)-4-HYDROXY-; ETHYL ESTER | DIXYRAZINE .HCl (HCl STRIPPED) |
|-----------------------------|------------------|----------------------------------------------------------------------------------|--------------------------------|
| Structure                   |                  |                                                                                  |                                |
| Actual Endpoint (-log C)    | 1.538            | 2.076                                                                            | 3.029                          |
| Predicted Endpoint (-log C) | 2.82541          | 2.50101                                                                          | 2.47585                        |
| Distance                    | 0.615            | 0.615                                                                            | 0.654                          |
| Reference                   | FRPSAX 36;372;81 | TXAPA9 18;185;71                                                                 | ANPBAZ 61;669;61               |

## Model Applicability

Unknown features are fingerprint features in the query molecule, but not found or appearing too infrequently in the training set.

1. All properties and OPS components are within expected ranges.
2. Unknown ECFP\_2 feature: 1139738044: [\*]:[c](:[\*])C#C
3. Unknown FCFP\_6 feature: 16: [\*][c](:[\*]):[\*]
4. Unknown FCFP\_6 feature: 1293778554: [\*]:[c](:[\*])N[c](:[\*]):[\*]
5. Unknown FCFP\_6 feature: 1747237384: [\*][c]1:[\*]:[\*]:[cH]:n:1
6. Unknown FCFP\_6 feature: 1618154665: [\*][c](:[\*]):[cH]:[cH]:[\*]
7. Unknown FCFP\_6 feature: -1151884458: [\*]N[c](:n:[\*]):[c](:[\*]):[\*]
8. Unknown FCFP\_6 feature: -124685461: [\*]n1:[\*]:[\*]:n:[cH]:1
9. Unknown FCFP\_6 feature: 902193919: [\*]:[c](:[\*])C#C
10. Unknown FCFP\_6 feature: 131784192: [\*]C#C

## Feature Contribution

### Top features for positive contribution

| Fingerprint | Bit/Smiles | Feature Structure | Score |
|-------------|------------|-------------------|-------|
|             |            |                   |       |

|                                        |             |                                                                                                                   |        |
|----------------------------------------|-------------|-------------------------------------------------------------------------------------------------------------------|--------|
| ECFP_6                                 | 642810091   | 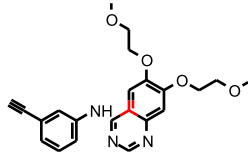<br><chem>[*]C(=[*])[*]</chem> | 0.281  |
| ECFP_6                                 | -1897341097 | <br><chem>[*]N[*]</chem>       | 0.216  |
| FCFP_6                                 | 136627117   | <br><chem>[*]N([*])C</chem>    | 0.17   |
| Top Features for negative contribution |             |                                                                                                                   |        |
| Fingerprint                            | Bit/Smiles  | Feature Structure                                                                                                 | Score  |
| ECFP_6                                 | 655739385   | <br><chem>[*]:n:[*]</chem>   | -0.239 |
| ECFP_6                                 | 734603939   | <br><chem>[*]C</chem>        | -0.201 |

FCFP\_6

1036089772

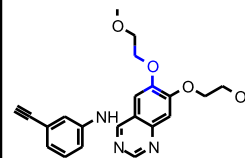

[\*]CO[c](:[\*]):[\*]

-0.136
